# Supplementary material for: Functional status analysis of RNH1 in bladder cancer for predicting immunotherapy response
Source: Sci Rep. 2023 Aug 3;13:12625. doi: 10.1038/s41598-023-39827-7 (PMC10400633; doi:10.1038/s41598-023-39827-7)
Supplement: Supplementary file 2 — Supplementary Tables. [file 41598_2023_39827_MOESM2_ESM.xlsx]

## Sheet: Table S1
Table S1. Abbreviations of cancers in TCGA
Abbreviation	Cancer type
ACC	Adrenocortical carcinoma
BLCA	Bladder urothelial carcinoma
BRCA	Breast invasive carcinoma
CESC	Cervical squamous cell carcinoma and endocervical adenocarcinoma
CHOL	Cholangiocarcinoma
COAD	Colon adenocarcinoma
DLBC	Lymphoid neoplasm diffuse large B-cell lymphoma
ESCA	Esophageal carcinoma
GBM	Glioblastoma multiforme
HNSC	Head and neck squamous cell carcinoma
KICH	Kidney chromophobe
KIRC	Kidney renal clear cell carcinoma
KIRP	Kidney renal papillary cell carcinoma
LAML	Acute myeloid leukemia
LGG	Brain lower grade glioma
LIHC	Liver hepatocellular carcinoma
LUAD	Lung adenocarcinoma
LUSC	Lung squamous cell carcinoma
MESO	Mesothelioma
OV	Ovarian serous cystadenocarcinoma
PAAD	Pancreatic adenocarcinoma
PCPG	Pheochromocytoma and paraganglioma
PRAD	Prostate adenocarcinoma
READ	Rectum adenocarcinoma
SARC	Sarcoma
SKCM	Skin cutaneous melanoma
STAD	Stomach adenocarcinoma
TGCT	Testicular germ cell tumors
THCA	Thyroid carcinoma
THYM	Thymoma
UCS	Uterine carcinosarcoma
UVM	Uveal melanoma

## Sheet: Table S2
Table S2. GEO dataset information
GEO accession	Experiment type	Contributor(s)	PMID	Citation(s)
GSE31684	Expression profiling by array	Riester M, Taylor JM, Feifer A, Koppie T,Riester M, Werner L, Bellmunt J, Selvarajah S et al.	PMID: 22228636	Riester M, Taylor JM, Feifer A, Koppie T et al. Combination of a novel gene expression signature with a clinical nomogram improves the prediction of survival in high-risk bladder cancer. Clin Cancer Res 2012 Mar 1;18(5):1323-33. PMID: 22228636 Riester M, Werner L, Bellmunt J, Selvarajah S et al. Integrative analysis of 1q23.3 copy-number gain in metastatic urothelial carcinoma. Clin Cancer Res 20…
GSE5287	Expression profiling by array	Als AB, Dyrskjøt L, von der Maase H, Koed K et al.	PMID: 17671123	Als AB, Dyrskjøt L, von der Maase H, Koed K et al. Emmprin and survivin predict response and survival following cisplatin-containing chemotherapy in patients with advanced bladder cancer. Clin Cancer Res 2007 Aug 1;13(15 Pt 1):4407-14. PMID: 17671123
GSE48057	Expression profiling by array	Cray JJ Jr	NA	NA
GSE48277	Expression profiling by array	Choi W, Porten S, Kim S, Willis D, Guo CC, Bondaruk J, Yao H, Wang Z et al.	PMID: 24525232 PMID: 32546765	Choi W, Porten S, Kim S, Willis D et al. Identification of distinct basal and luminal subtypes of muscle-invasive bladder cancer with different sensitivities to frontline chemotherapy. Cancer Cell 2014 Feb 10;25(2):152-65. PMID: 24525232 Guo CC, Bondaruk J, Yao H, Wang Z et al. Assessment of Luminal and Basal Phenotypes in Bladder Cancer. Sci Rep 2020 Jun 16;10(1):9743. PMID: 32546765
GSE13507	Expression profiling by array	Leem S, Chu I, Kim Y, Kim S, Kim W	PMID: 20059769 PMID: 20421545	Kim WJ, Kim EJ, Kim SK, Kim YJ et al. Predictive value of progression-related gene classifier in primary non-muscle invasive bladder cancer. Mol Cancer 2010 Jan 8;9:3. PMID: 20059769 Lee JS, Leem SH, Lee SY, Kim SC et al. Expression signature of E2F1 and its associated genes predict superficial to invasive progression of bladder tumors. J Clin Oncol 2010 Jun 1;28(16):2660-7. PMID: 20421545
GSE69795	Expression profiling by array	Choi W, Lee I, Siefker-Radtke A, McConkey D	PMID: 26343003	McConkey DJ, Choi W, Shen Y, Lee IL et al. A Prognostic Gene Expression Signature in the Molecular Classification of Chemotherapy-naïve Urothelial Cancer is Predictive of Clinical Outcomes from Neoadjuvant Chemotherapy: A Phase 2 Trial of Dose-dense Methotrexate, Vinblastine, Doxorubicin, and Cisplatin with Bevacizumab in Urothelial Cancer. Eur Urol 2016 May;69(5):855-62. PMID: 26343003

## Sheet: Table S3
Table S3. 17 functional gene signatures (FUNGs)
Angiogenesis	Angiogenesis ensures that cancer cells receive continuous supplies of oxygen and other nutrients.	ACVRL1	JAG1	ANGPT1	ANGPT2	CD34	CDC42	MAPK14	TYMP	EDN1	EFNB2	EGR3	EPHB4	PTK2B	FGF2	FGFR1	VEGFD	FOXC2	FLT1	FLT4	FN1	GPLD1	NR4A1	ID1	ITGA5	ITGAV	ITGB1	KDR	LOXL2	MMP14	NOTCH1	PDGFA	PDGFRB	PGF	PIK3CA	PTGS2	PTK2	ROBO1	SHC1	SRF	TAL1	TDGF1	TEK	VAV2	VEGFA	VEGFC	FGF18	NRP1	SEMA5A
Apoptosis	The inactivation of apoptosis in cancer cells lead to the persistence of such grossly abnormal cells in the tissues.	APAF1	ATF4	ATM	BAK1	BID	BOK	BRCA2	CASP2	CASP4	CASP9	DAPK3	DDIT3	E2F2	EP300	GSN	IFI16	INHBA	KRT8	LGALS9	NFATC4	P2RX7	PMAIP1	POLB	PPP2R1B	PPP2R5C	SORT1	SKIL	STK3	STK4	TIMP3	TNFRSF1A	TNFRSF1B	TP53BP2	DYRK2	CRADD	BCL10	AIFM1	BCL2L11	DNM1L	BCAP31	SIVA1	MLLT11	RIPK3	SNW1	PPP1R13B	PHLDA3	NUPR1	BBC3
Cell Cycle	Cell cycle,a critical process to ensure correct cell division,lies at the heart of cancer.	ANLN	ANP32E	ATAD2	AURKA	BRIP1	CASP8AP2	CBX5	CCNA2	CCNB2	CCND1	CCNE1	CCNE2	CDC25C	CDC45	CDC6	CDCA2	CDCA3	CDCA8	CENPA	CENPE	CHAF1B	CKAP2L	CKAP5	CKS1B	CKS2	CLSPN	DHFR	DLGAP5	DSCC1	DTL	ECT2	EXO1	FEN1	GAS2L3	GINS2	GTSE1	HELLS	HJURP	HMMR	KIF11	KIF23	KIF2C	LBR	MCM4	MCM5	MCM6	MKI67	NASP
Differentiation	The degree of cell differentiation can be used to measure the progress of cancer,and dedifferentiated cells can lead to the formation of cancer.	ABL1	ACVR1	ADA	AGT	AKT1	ANXA1	ATOH1	ATP2B2	ATP7A	AXL	BCL2	BCL3	PRDM1	BMP2	BMP6	BRAF	CASP8	CAV3	RUNX2	RUNX1	CCNB1	CD86	CDK1	CDC42	CDH2	CEBPA	CEBPB	CREB1	MAPK14	CSF1	CSF1R	CSF2	DRD1	EDN3	EDNRB	EPHA2	EMX1	EP300	ERBB4	ERCC2	FGF8	FGFR1	FGFR2	FOXC2	FLT3LG	MTOR	GATA1	GATA4
DNA damage	DNA damage is an alteration in the chemical structure of DNA,and un-repaired DNA damages accumulate in replicating cells possibly contribute to progression to cancer	BRCA1	MRE11	FOXN3	HIPK2	SP100	PSME4	RPS6KA6	TP63	GTSE1	PPP2R5C	TP73	CNOT4	DNAJA1	BAX	UIMC1	AURKA	CNOT3	PCBP4	TFAP4	E2F1	RGCC	RBL2	NBN	GML	BABAM1	CASP2	CDK5RAP3	CCND1	FOXM1	CDKN1B	CNOT2	ING4	CNOT6	TFDP2	NEK11	PSMD14	ARID3A	MAD2L2	GADD45A	SYF2	RPA2	PLAGL1	RBBP6	CDK2	CDKN1A	SOX4	CNOT1	PRMT1
DNA repair	DNA repair plays a fundamental role in the maintenance of genomic integrity,it's deficits may lead to carcinogenesis.	RAD52	POLR2J	LIG3	REV3L	BRCA1	ERCC1	MNAT1	MRE11	RFC1	TDP1	RRM2B	ERCC8	RFC2	POLD1	NTHL1	TP53BP1	POLB	XRCC1	XAB2	POLD3	XRCC5	RIF1	PALB2	SIRT1	POLR2E	POLR2F	POLE2	APEX1	POLI	POLA1	POLR2C	MPG	NBN	ERCC2	POLR2I	LIG1	RPA3	POLD2	RAD51C	GTF2H1	RAD51AP1	GTF2H3	RFC5	FANCE	RAD50	OGG1	FANCL	MAD2L2
EMT	EMT has been indicated to be involved in the initiation of metastasis in cancer progression and in acquiring drug resistance.	BGN	CDH11	CDH2	COL1A2	COL3A1	COL5A2	CTGF	DDR2	ECM1	FAP	FBLN5	FBN1	FOXC2	FSTL1	GSC	HAS2	IGFBP4	MMP1	MMP2	MYL9	NR2F1	PCOLCE	POSTN	PRRX1	PTX3	RGS4	SNAI1	SPOCK1	TAGLN	TUBA1A	TWIST1	VIM	WNT5A	ACTA2	BRCA1	SERPINH1	CENPA	COL1A1	COL4A1	COL6A2	VCAN	CTSB	DAB2	DCK	FBLN2	FN1	GAS1	HIF1A
Hypoxia	Tumor-hypoxia contributes to cell mobility,metastasis and therapy resistance.	PLIN2	ADM	ADORA2B	AK4	ALDOC	ANG	ATF3	BNIP3	BNIP3L	CA9	CA12	CAV1	CCNG2	KLF6	DUSP1	EFNA1	ENO2	F3	FOS	NR3C1	GYS1	HIF1A	HK1	HK2	HMOX1	IGFBP3	IL6	JUN	LDHA	LOX	MIF	MXI1	NFIL3	P4HA1	SERPINE1	PAM	PDGFB	PDK1	PFKFB3	PFKFB4	PFKP	PGF	PGK1	PGM1	PLAUR	PLOD2	PPP1R3C	RNASE4
Inflammation	Chronic inflammation can cause about 15% to 25% of human cancers.	BMP2	CD6	CEBPB	CCR7	CSF1	F3	F12	FCER1G	B4GALT1	FFAR2	CXCL1	CXCL2	CXCL3	ICAM1	IL1A	IL1B	IL6	CXCL8	IL12B	TNFRSF9	IL18	CXCL10	IRAK2	KLKB1	NFKB1	NFKB2	OLR1	OSM	SERPINE1	MAP2K3	PTGS2	PTX3	REL	RELA	RELB	S100A8	CCL2	CCL3	CCL4	CCL5	CCL7	CCL8	CCL18	CCL20	CCL23	CXCL6	CXCL11	THBS1
Invasion	Invasion is a critical carcinogenic event in which cancer cells escape from their primary sites and spread to blood or lymphatic vessels.	AEBP1	AKR1B1	AMD1	SLC25A5	ATP5PB	BAG1	BGN	C1QB	CALD1	CAPG	CCNE1	CDH11	CKS1B	CKS2	COL1A1	COL1A2	COL3A1	COL5A1	COL5A2	COL6A2	COL6A3	COL10A1	COL11A1	COMP	CSE1L	VCAN	CTSK	DAB2	DDX5	EDNRA	FAP	FBN1	FN1	GNAS	H2AFZ	HMGB2	HNRNPU	HSD17B4	CYR61	INHBA	LAMB1	LAMC1	LGALS1	LOX	LOXL2	LUM	MMP2	MMP11
Metastasis	Metastasis promotes the malignant transformation of cancer and causes most cancer deaths.	ACKR3	AFP	AGR2	AKT1	ALDH1A1	ANGPTL4	ANXA1	ANXA2	AQP5	ATF3	AURKA	AXL	B2M	BMI1	BMP2	BRAF	BSG	CA9	CCDC88A	CCND1	CCR7	CD24	CD274	CD44	CDCP1	CDH17	CDH2	CEACAM1	CEACAM5	CLIC1	CRP	CTGF	CTNND1	CTSB	CTSK	CTSL	CTTN	CXCL12	CXCL2	CXCL8	CXCR2	CYR61	DDR2	EGF	EGFR	EGR1	EPAS1	EPCAM
Proliferation	Proliferation,as one of the cancer hallmarks,is responsible for tumor progression.	ADK	BAX	CCND1	BMPR1A	BUB1B	CCNA2	CCNB1	CD40	CDK1	CDC20	CYBA	HMGB2	IGFBP2	MKI67	PRKD1	TEK	TK1	TOP2A	DLGAP5	MELK	GINS1	KIF14	RACGAP1	ASPM	CD24	CX3CL1	IGF1	CD74	TP63	FGFR1	DCT	PTPRC	LHX5	ESR1	ABL1	XBP1	PDGFB	HIF1A	CD40LG	FGF9	FZD3	RIPK2	NUMBL	EBI3	WNT2	IL2	IL23A	VEGFA
Quiescence	Quiescent cancer cells are resistant to chemotherapy.	ALOX5	ANXA5	AREG	CREM	CRHBP	EMP1	EVI2A	GBP2	CXCL1	CXCL2	CXCL3	GUCY1A1	H1F0	HBB	HLX	IL1B	CXCL8	INHBA	CXCL10	JUN	TM4SF1	MLLT3	NR4A2	SERPINB2	PCDH9	PMCH	PTGS2	PTPRC	RGS1	RHAG	TSPAN31	CCL8	CCL19	CCL20	CXCL6	CXCL11	CXCL5	TRA2B	SPTBN1	SVIL	TCF7L2	TFPI	TGFB1I1	TPBG	TNFSF4	FXR1	NRIP1	HIST1H2AC
Stemness	Cancer cells with high stemness fuel the growth of cancer.	AFMID	AFP	ANPEP	APC	AQP1	ASCL1	ASCL2	AXIN2	AZGP1	BAZ2B	BMI1	BOC	C6orf62	CA2	CAMK2N1	CCL5	CCND2	CD200	CD24	CD33	CD38	CD44	CDCA7	CDK6	CEBPA	CFTR	CHD7	CORO1C	CXCL2	DBX1	DBX2	DNMT3A	DPP4	EBF1	EEF1A1	EGFR	EIF4B	EMX1	EMX2	ENG	EPHB2	ETS2	ETV1	EVI2A	EZH2	FABP7	FAM84A	FBLIM1
Autophagy	Autophagy has opposing, context-dependent roles in cancer, and interventions to both stimulate and inhibit autophagy have been proposed as cancer therapies.	AMBRA1	APOL1	ARNT	ARSA	ARSB	ATF4	ATF6	ATG10	ATG12	ATG16L1	ATG16L2	ATG2A	ATG2B	ATG3	ATG4A	ATG4B	ATG4C	ATG4D	ATG5	ATG7	ATG9A	ATG9B	ATIC	BAG1	BAG3	BAK1	BAX	BCL2	BCL2L1	BECN1	BID	BIRC5	BIRC6	BNIP1	BNIP3	BNIP3L	C12orf44	C17orf88	CALCOCO2	CAMKK2	CANX	CAPN1	CAPN10	CAPN2	CAPNS1	CASP1	CASP3	CASP4
Ferroptosis	Ferroptosis is a newly discovered form of regulated cell death that is the nexus between metabolism, redox biology, and human health.	ABCC1	ACO1	ACSF2	ACSL3	ACSL4	ACVR1B	AIFM2	AKR1C1	AKR1C2	AKR1C3	ALOX12	ALOX12B	ALOX15	ALOX15B	ALOX5	ALOXE3	ANO6	ARNTL	ATF3	ATF4	ATG13	ATG16L1	ATG3	ATG4D	ATG5	ATG7	ATM	ATP5MC3	BACH1	BAP1	BECN1	BID	BRD4	CA9	CARS1	CAV1	CBS	CD44	CDKN1A	CDKN2A	CDO1	CHAC1	CHMP5	CHMP6	CISD1	CISD2	CS	CYBB
Tumor immune escape	Tumor immune escape is noted to be a phenomenon in which tumor cells proliferate and metastasize by evading recognition and attack of the immune system by different mechanisms.	SCAF4	HSPA13	PTPN2	SUSD6	PSMG1	IFNGR2	UBE2G2	N6AMT1	VPS4B	IFNAR2	IPPK	RBCK1	CHIC2	CHMP5	YAP1	MAP3K7	EMC6	PPP2R2A	TAB1	IRF9	HIRA	BCL2L1	F8A3	IFNAR1	VPS13A	PTAR1	BECN1	DICER1	MAPK1	WIPI2	FITM2	RCE1	MED23	WDR7	TAB2	PCED1B	RNF31	DNTTIP1	RGP1	NCBP1	JAK2	VPS16	ATG3	PIGT	SLC25A32	ATG5	ATG12	IFNGR1
[truncated: 174 more columns]

## Sheet: Table S4
Table S4. Pearson correlation between RNH1 expression and protein-coding genes
gene1	gene2	coefficient	p.value	method
TSPAN6	RNH1	-0.212587	1.29e-05	pearson
TNMD	RNH1	-0.0425987	0.387299	pearson
DPM1	RNH1	-0.0201448	0.682768	pearson
SCYL3	RNH1	-0.262091	6.25e-08	pearson
C1orf112	RNH1	-0.211414	1.44e-05	pearson
FGR	RNH1	0.190629	9.51e-05	pearson
CFH	RNH1	0.154617	0.00160242	pearson
FUCA2	RNH1	-0.0170735	0.729066	pearson
GCLC	RNH1	-0.122743	0.0124418	pearson
NFYA	RNH1	-0.24508	4.45e-07	pearson
STPG1	RNH1	-0.189036	0.000109004	pearson
NIPAL3	RNH1	-0.115573	0.0186554	pearson
LAS1L	RNH1	-0.0343708	0.485532	pearson
ENPP4	RNH1	-0.242627	5.83e-07	pearson
SEMA3F	RNH1	-0.154344	0.00163358	pearson
CFTR	RNH1	-0.0544408	0.269083	pearson
ANKIB1	RNH1	-0.249457	2.72e-07	pearson
CYP51A1	RNH1	-0.0308419	0.531452	pearson
KRIT1	RNH1	-0.307404	1.65e-10	pearson
RAD52	RNH1	-0.261096	7.04e-08	pearson
BAD	RNH1	0.120717	0.0139791	pearson
LAP3	RNH1	0.284134	3.97e-09	pearson
CD99	RNH1	0.142216	0.0037355	pearson
HS3ST1	RNH1	-0.0227559	0.644316	pearson
AOC1	RNH1	0.0381347	0.439013	pearson
WNT16	RNH1	0.0170144	0.729967	pearson
HECW1	RNH1	0.085948	0.0806844	pearson
MAD1L1	RNH1	0.176784	0.000300741	pearson
LASP1	RNH1	-0.0754283	0.125453	pearson
SNX11	RNH1	0.100356	0.0412585	pearson
TMEM176A	RNH1	0.16831	0.000584297	pearson
M6PR	RNH1	0.0586982	0.23336	pearson
KLHL13	RNH1	0.068914	0.161628	pearson
CYP26B1	RNH1	0.0683733	0.164951	pearson
ICA1	RNH1	-0.370192	6.81e-15	pearson
DBNDD1	RNH1	-0.170148	0.000507226	pearson
ALS2	RNH1	-0.10098	0.0400069	pearson
CASP10	RNH1	0.0229713	0.641184	pearson
CFLAR	RNH1	0.0612417	0.213689	pearson
TFPI	RNH1	0.0684891	0.164235	pearson
NDUFAF7	RNH1	-0.236301	1.16e-06	pearson
RBM5	RNH1	-0.148055	0.0025276	pearson
MTMR7	RNH1	-0.249035	2.85e-07	pearson
SLC7A2	RNH1	-0.122607	0.0125399	pearson
ARF5	RNH1	-0.0809071	0.10019	pearson
SARM1	RNH1	-0.252882	1.84e-07	pearson
POLDIP2	RNH1	-0.0841375	0.0873024	pearson
PLXND1	RNH1	0.184664	0.000157755	pearson
AK2	RNH1	0.0466777	0.343437	pearson
CD38	RNH1	0.184509	0.000159805	pearson
FKBP4	RNH1	-0.201478	3.64e-05	pearson
KDM1A	RNH1	-0.175985	0.000320592	pearson
RBM6	RNH1	-0.200897	3.83e-05	pearson
CAMKK1	RNH1	-0.0436182	0.376028	pearson
RECQL	RNH1	0.106681	0.0299856	pearson
VPS50	RNH1	-0.191651	8.7e-05	pearson
HSPB6	RNH1	0.0967484	0.0491597	pearson
ARHGAP33	RNH1	-0.15392	0.00168322	pearson
NDUFAB1	RNH1	-0.0598627	0.224201	pearson
PDK4	RNH1	-0.0535857	0.276686	pearson
SLC22A16	RNH1	0.0740337	0.132614	pearson
ZMYND10	RNH1	-0.0550828	0.263469	pearson
ABCB5	RNH1	0.038766	0.431468	pearson
ARX	RNH1	-0.0342295	0.487328	pearson
SLC25A13	RNH1	-0.130229	0.00797665	pearson
ST7	RNH1	-0.0048612	0.921446	pearson
CDC27	RNH1	-0.0143	0.771742	pearson
SLC4A1	RNH1	-0.0441168	0.370592	pearson
CALCR	RNH1	0.130874	0.00766882	pearson
HCCS	RNH1	0.125939	0.0103189	pearson
DVL2	RNH1	-0.0830328	0.0915508	pearson
PRSS22	RNH1	0.0307585	0.532564	pearson
UPF1	RNH1	-0.177953	0.00027375	pearson
SKAP2	RNH1	-0.0423754	0.389794	pearson
SLC25A5	RNH1	0.178357	0.000264968	pearson
MCUB	RNH1	0.170509	0.000493236	pearson
HOXA11	RNH1	-0.0392944	0.425211	pearson
POLR2J	RNH1	-0.233437	1.57e-06	pearson
DHX33	RNH1	-0.153405	0.00174546	pearson
MEOX1	RNH1	0.132565	0.00691141	pearson
THSD7A	RNH1	-0.0532096	0.280077	pearson
LIG3	RNH1	-0.260942	7.17e-08	pearson
RPAP3	RNH1	-0.0813087	0.0985099	pearson
ACSM3	RNH1	-0.211502	1.43e-05	pearson
REXO5	RNH1	-0.135302	0.0058272	pearson
CIAPIN1	RNH1	0.133313	0.0065984	pearson
SPPL2B	RNH1	-0.151974	0.00192935	pearson
FAM214B	RNH1	0.187694	0.000122202	pearson
COPZ2	RNH1	0.339024	1.36e-12	pearson
PRKAR2B	RNH1	-0.0816641	0.0970419	pearson
MSL3	RNH1	-0.132098	0.00711383	pearson
CREBBP	RNH1	-0.0569396	0.247687	pearson
TSPOAP1	RNH1	-0.0855833	0.0819839	pearson
MPO	RNH1	0.0341938	0.487783	pearson
PON1	RNH1	-0.0828128	0.0924161	pearson
GCFC2	RNH1	-0.256491	1.21e-07	pearson
WDR54	RNH1	-0.0278726	0.57172	pearson
CROT	RNH1	-0.127347	0.00949022	pearson
ABCB4	RNH1	0.0331571	0.501079	pearson
KMT2E	RNH1	-0.226793	3.14e-06	pearson
RHBDD2	RNH1	0.0969265	0.0487419	pearson
SOX8	RNH1	-0.0147997	0.763998	pearson
IBTK	RNH1	-0.13103	0.00759587	pearson
ZNF195	RNH1	-0.161835	0.000950722	pearson
MYCBP2	RNH1	0.00532134	0.914038	pearson
FBXL3	RNH1	0.0103458	0.833765	pearson
ITGAL	RNH1	0.173315	0.000396155	pearson
PDK2	RNH1	0.0118654	0.809785	pearson
ITGA3	RNH1	0.266462	3.69e-08	pearson
ZFX	RNH1	-0.0945215	0.0546413	pearson
LAMP2	RNH1	0.174519	0.000360246	pearson
ITGA2B	RNH1	-0.0401004	0.41577	pearson
ASB4	RNH1	-0.0337969	0.492851	pearson
GDE1	RNH1	-0.121203	0.0135961	pearson
REX1BD	RNH1	-0.0856909	0.0815988	pearson
CRLF1	RNH1	0.172302	0.000428963	pearson
TMEM98	RNH1	-0.0437632	0.374443	pearson
YBX2	RNH1	-0.0188886	0.701573	pearson
KRT33A	RNH1	-0.0562714	0.253289	pearson
MAP3K14	RNH1	0.13618	0.00551297	pearson
ABCC8	RNH1	0.0392677	0.425526	pearson
CACNG3	RNH1	-0.00482797	0.921981	pearson
TMEM132A	RNH1	0.103475	0.0353182	pearson
AP2B1	RNH1	0.096884	0.0488414	pearson
TAC1	RNH1	-0.0595983	0.226258	pearson
ZNF263	RNH1	-0.10097	0.0400269	pearson
CX3CL1	RNH1	0.0917734	0.0620966	pearson
SPATA20	RNH1	-0.1133	0.0211236	pearson
CACNA1G	RNH1	0.00094824	0.984653	pearson
TNFRSF12A	RNH1	0.309943	1.14e-10	pearson
DLX6	RNH1	-0.128237	0.00899757	pearson
MAP3K9	RNH1	-0.0979663	0.0463617	pearson
RALA	RNH1	0.0978295	0.046669	pearson
BAIAP2L1	RNH1	-0.0607757	0.217201	pearson
KDM7A	RNH1	-0.162369	0.000913967	pearson
ETV1	RNH1	0.0197739	0.6883	pearson
AGK	RNH1	-0.29331	1.17e-09	pearson
ALDH3B1	RNH1	0.165574	0.000719289	pearson
TTC22	RNH1	-0.0369223	0.453711	pearson
PHTF2	RNH1	-0.077807	0.113936	pearson
CCL26	RNH1	0.206136	2.37e-05	pearson
FARP2	RNH1	-0.168683	0.000567813	pearson
USH1C	RNH1	-0.0117555	0.811513	pearson
GGCT	RNH1	-0.206285	2.34e-05	pearson
DBF4	RNH1	-0.137041	0.00522	pearson
TBXA2R	RNH1	0.262318	6.08e-08	pearson
IFRD1	RNH1	-0.0773593	0.116037	pearson
LGALS14	RNH1	0.0385356	0.434213	pearson
COX10	RNH1	0.0195683	0.691374	pearson
GTF2IRD1	RNH1	-0.205276	2.56e-05	pearson
PAF1	RNH1	-0.0490793	0.319154	pearson
VPS41	RNH1	-0.194254	6.94e-05	pearson
ARHGAP44	RNH1	-0.0969777	0.0486224	pearson
ELAC2	RNH1	0.0822153	0.0947998	pearson
SCIN	RNH1	-0.197956	5e-05	pearson
ARSD	RNH1	-0.152366	0.00187725	pearson
PNPLA4	RNH1	-0.00870914	0.859766	pearson
MYH13	RNH1	0.0704106	0.152692	pearson
ADIPOR2	RNH1	-0.00720617	0.883777	pearson
CDKL3	RNH1	-0.212509	1.3e-05	pearson
UPP2	RNH1	-0.170902	0.000478426	pearson
PRSS21	RNH1	0.0940273	0.0559242	pearson
MARK4	RNH1	-0.00998645	0.83946	pearson
PROM1	RNH1	-0.0266384	0.588875	pearson
CCDC124	RNH1	0.0662764	0.178326	pearson
CEACAM21	RNH1	0.078006	0.113011	pearson
PAFAH1B1	RNH1	0.0240618	0.625425	pearson
NOS2	RNH1	0.0153817	0.755007	pearson
DNAH9	RNH1	-0.0743409	0.13101	pearson
KIAA0100	RNH1	-0.066942	0.173996	pearson
SLC13A2	RNH1	-0.0735806	0.135008	pearson
TRAPPC6A	RNH1	-0.201634	3.58e-05	pearson
MATK	RNH1	0.164933	0.00075487	pearson
CEACAM7	RNH1	-0.0160529	0.74468	pearson
CD79B	RNH1	0.00437088	0.929347	pearson
SCN4A	RNH1	-0.0621589	0.206897	pearson
ST7L	RNH1	0.0096631	0.84459	pearson
TKTL1	RNH1	-0.0299948	0.542792	pearson
PAX6	RNH1	0.0560119	0.255488	pearson
RPUSD1	RNH1	-0.0578295	0.240362	pearson
RHBDF1	RNH1	-0.0215814	0.661503	pearson
LUC7L	RNH1	-0.206591	2.27e-05	pearson
CACNA2D2	RNH1	-0.0988966	0.0443153	pearson
BAIAP3	RNH1	-0.106532	0.0302181	pearson
TSR3	RNH1	0.252832	1.85e-07	pearson
PIGQ	RNH1	-0.0235067	0.633426	pearson
CRAMP1	RNH1	-0.193611	7.34e-05	pearson
TEAD3	RNH1	-0.23989	7.87e-07	pearson
SELE	RNH1	-0.0654575	0.183761	pearson
DNAJC11	RNH1	-0.128096	0.00907414	pearson
FMO3	RNH1	-0.00787079	0.873145	pearson
MYLIP	RNH1	-0.266433	3.7e-08	pearson
NOX1	RNH1	-0.0681577	0.166291	pearson
E2F2	RNH1	-0.0525461	0.286126	pearson
PSMB1	RNH1	0.155411	0.00151461	pearson
SYN1	RNH1	-0.025554	0.604138	pearson
JARID2	RNH1	-0.0439625	0.372269	pearson
CDKL5	RNH1	-0.290635	1.68e-09	pearson
CAMK1G	RNH1	0.098114	0.0460316	pearson
CDK11A	RNH1	-0.200887	3.84e-05	pearson
NADK	RNH1	-0.00893293	0.856201	pearson
TFAP2B	RNH1	-0.0843335	0.0865656	pearson
TFAP2D	RNH1	-0.045708	0.353566	pearson
DLEC1	RNH1	-0.277549	9.28e-09	pearson
CYTH3	RNH1	0.194634	6.71e-05	pearson
ADAM22	RNH1	-0.144184	0.00327987	pearson
SYPL1	RNH1	-0.0238441	0.628559	pearson
CYB561	RNH1	-0.0868888	0.0774092	pearson
SPAG9	RNH1	-0.185574	0.000146163	pearson
CELSR3	RNH1	-0.150406	0.00215119	pearson
AASS	RNH1	-0.0117421	0.811725	pearson
PLEKHG6	RNH1	-0.313523	6.79e-11	pearson
SS18L2	RNH1	-0.295536	8.65e-10	pearson
MPND	RNH1	-0.206765	2.23e-05	pearson
MGST1	RNH1	-0.118249	0.0160758	pearson
CRY1	RNH1	-0.149699	0.00225851	pearson
PGLYRP1	RNH1	-0.11092	0.0240059	pearson
NFIX	RNH1	0.20113	3.75e-05	pearson
ST3GAL1	RNH1	-0.187277	0.000126602	pearson
MMP25	RNH1	0.239709	8.03e-07	pearson
IL32	RNH1	0.233128	1.62e-06	pearson
PKD1	RNH1	0.0026308	0.957439	pearson
MAPK8IP2	RNH1	0.00180456	0.970799	pearson
MED24	RNH1	-0.105331	0.0321416	pearson
RHOBTB2	RNH1	-0.0777419	0.114239	pearson
HEATR5B	RNH1	-0.293373	1.16e-09	pearson
SEC62	RNH1	-0.154653	0.00159825	pearson
RPS20	RNH1	-0.0779086	0.113463	pearson
CSDE1	RNH1	-0.0626179	0.203557	pearson
UBE3C	RNH1	-0.0145696	0.767561	pearson
REV3L	RNH1	-0.115611	0.0186166	pearson
TENM1	RNH1	-0.0780798	0.112669	pearson
PAX7	RNH1	-0.027159	0.58161	pearson
MASP2	RNH1	-0.226701	3.17e-06	pearson
IYD	RNH1	-0.152563	0.00185158	pearson
FAM76A	RNH1	-0.176976	0.000296154	pearson
TRAF3IP3	RNH1	0.129838	0.00816837	pearson
POMT2	RNH1	0.0855904	0.0819582	pearson
VTA1	RNH1	-0.118973	0.0154339	pearson
MLXIPL	RNH1	-0.0558753	0.25665	pearson
BAZ1B	RNH1	-0.123897	0.0116349	pearson
RANBP9	RNH1	-0.160379	0.00105815	pearson
ETV7	RNH1	0.141648	0.00387729	pearson
SPRTN	RNH1	-0.103848	0.0346585	pearson
EEF1AKNMT	RNH1	-0.0430633	0.382137	pearson
DYRK4	RNH1	0.057297	0.244727	pearson
ZNF207	RNH1	-0.235295	1.29e-06	pearson
UQCRC1	RNH1	0.152696	0.00183441	pearson
STARD3NL	RNH1	0.13891	0.00463169	pearson
CD9	RNH1	-0.0982344	0.0457639	pearson
HHATL	RNH1	-0.019363	0.694449	pearson
NCAPD2	RNH1	-0.00549893	0.911181	pearson
IFFO1	RNH1	0.284714	3.68e-09	pearson
GIPR	RNH1	0.0927905	0.0592451	pearson
PHF7	RNH1	-0.114437	0.0198557	pearson
SEMA3G	RNH1	-0.0192404	0.696288	pearson
NISCH	RNH1	-0.0618398	0.209243	pearson
STAB1	RNH1	0.212736	1.27e-05	pearson
FUZ	RNH1	-0.0891244	0.0700579	pearson
SLC6A13	RNH1	-0.152444	0.0018671	pearson
IDS	RNH1	-0.00407746	0.934079	pearson
PRSS3	RNH1	0.00317041	0.948721	pearson
ZNF200	RNH1	-0.194757	6.64e-05	pearson
CD4	RNH1	0.322294	1.84e-11	pearson
LRRC23	RNH1	-0.0486106	0.323803	pearson
BTK	RNH1	0.144164	0.00328416	pearson
HFE	RNH1	0.0174969	0.72262	pearson
SCMH1	RNH1	-0.186717	0.000132752	pearson
FYN	RNH1	0.195934	5.98e-05	pearson
HIVEP2	RNH1	-0.0583328	0.236288	pearson
FMO1	RNH1	0.160303	0.00106405	pearson
ELOA	RNH1	-0.132004	0.00715484	pearson
LYPLA2	RNH1	-0.0363625	0.460591	pearson
CLCN6	RNH1	-0.138327	0.00480854	pearson
NME1-NME2	RNH1	-0.0137747	0.779907	pearson
SLC6A7	RNH1	0.0534797	0.277639	pearson
TSPAN9	RNH1	0.133391	0.00656685	pearson
BTBD7	RNH1	-0.126578	0.00993524	pearson
APBA3	RNH1	0.0854939	0.0823048	pearson
MKS1	RNH1	-0.155616	0.00149258	pearson
ABHD5	RNH1	-0.264414	4.73e-08	pearson
ANOS1	RNH1	0.139927	0.00433714	pearson
AKAP8L	RNH1	-0.255037	1.43e-07	pearson
MBTD1	RNH1	-0.421194	3.11e-19	pearson
UTP18	RNH1	-0.0226068	0.646487	pearson
RNF216	RNH1	0.0189694	0.700358	pearson
TTC19	RNH1	-0.194723	6.66e-05	pearson
PTBP1	RNH1	-0.0998282	0.0423428	pearson
DPF1	RNH1	0.0808944	0.100243	pearson
SYT7	RNH1	-0.134974	0.0059484	pearson
LARS2	RNH1	0.0390585	0.427998	pearson
PIK3C2A	RNH1	-0.0481313	0.328602	pearson
PLAUR	RNH1	0.343385	6.7e-13	pearson
ANLN	RNH1	0.0941103	0.055707	pearson
WIZ	RNH1	-0.159955	0.00109153	pearson
RABGAP1	RNH1	-0.0462639	0.347737	pearson
DCN	RNH1	0.153844	0.00169226	pearson
QPCTL	RNH1	-0.0836414	0.0891905	pearson
PPP5C	RNH1	-0.0295528	0.548757	pearson
CEP68	RNH1	-0.165104	0.000745214	pearson
MAP4K3	RNH1	-0.344755	5.36e-13	pearson
ZBTB32	RNH1	0.184207	0.000163883	pearson
TYROBP	RNH1	0.381876	8.03e-16	pearson
TMEM159	RNH1	-0.156985	0.00135337	pearson
GABRA3	RNH1	-0.0862789	0.0795199	pearson
BRCA1	RNH1	-0.149499	0.00228988	pearson
ERCC1	RNH1	0.228881	2.53e-06	pearson
CD22	RNH1	-0.00118269	0.980859	pearson
SEMA3B	RNH1	-0.0146048	0.767015	pearson
MBTPS2	RNH1	-0.0720955	0.143086	pearson
PRICKLE3	RNH1	-0.108809	0.0268413	pearson
LTF	RNH1	-0.00805275	0.870238	pearson
EXTL3	RNH1	0.1546	0.00160433	pearson
NR1H4	RNH1	-0.225162	3.71e-06	pearson
ELOVL5	RNH1	0.0985701	0.0450246	pearson
ALOX5	RNH1	-0.155827	0.00147039	pearson
KDM5D	RNH1	-0.0742058	0.131714	pearson
CALCOCO1	RNH1	-0.0435729	0.376525	pearson
UBR7	RNH1	0.0829613	0.0918313	pearson
MAP4K5	RNH1	-0.227582	2.89e-06	pearson
EHD3	RNH1	-0.135761	0.00566101	pearson
PSMC4	RNH1	-0.0517689	0.293322	pearson
MAN2B2	RNH1	-0.00124839	0.979796	pearson
SLC7A14	RNH1	-0.0727745	0.139348	pearson
CLDN11	RNH1	-0.0623668	0.20538	pearson
SLC25A39	RNH1	-0.00421748	0.931821	pearson
MVP	RNH1	0.399366	2.77e-17	pearson
NUB1	RNH1	0.0621155	0.207215	pearson
PGM3	RNH1	-0.0911446	0.0639154	pearson
RWDD2A	RNH1	-0.202829	3.21e-05	pearson
CLK1	RNH1	-0.156718	0.00137961	pearson
POLR3B	RNH1	-0.175376	0.00033656	pearson
ANGEL1	RNH1	-0.0751376	0.12692	pearson
RNF14	RNH1	-0.108911	0.0266979	pearson
DNASE1L1	RNH1	0.107682	0.0284691	pearson
DDX11	RNH1	-0.129314	0.00843221	pearson
HEBP1	RNH1	0.0464847	0.345439	pearson
GPRC5A	RNH1	0.0264965	0.590861	pearson
MAMLD1	RNH1	0.239474	8.23e-07	pearson
CD6	RNH1	0.143778	0.00336952	pearson
TACC3	RNH1	-0.0935441	0.0572029	pearson
UFL1	RNH1	-0.226113	3.37e-06	pearson
POLA2	RNH1	0.0618429	0.20922	pearson
ZC3H3	RNH1	-0.0971781	0.0481567	pearson
CAPN1	RNH1	0.0228802	0.642507	pearson
ACPP	RNH1	0.0121249	0.805707	pearson
SLC30A9	RNH1	-0.183152	0.00017891	pearson
MTMR11	RNH1	-0.0756208	0.124489	pearson
COX15	RNH1	-0.0476131	0.333843	pearson
CCDC88C	RNH1	-0.051881	0.292277	pearson
YAF2	RNH1	-0.246341	3.86e-07	pearson
ZMYND11	RNH1	-0.214835	1.04e-05	pearson
WAS	RNH1	0.184085	0.000165554	pearson
DPEP1	RNH1	0.0139336	0.777434	pearson
BID	RNH1	-0.176468	0.000308447	pearson
MATR3	RNH1	-0.237379	1.03e-06	pearson
NPC1L1	RNH1	-0.0588775	0.231933	pearson
XYLT2	RNH1	0.052667	0.285017	pearson
RGPD5	RNH1	-0.117811	0.0164757	pearson
STMN4	RNH1	-0.0295429	0.548892	pearson
NUDCD3	RNH1	0.0955059	0.0521585	pearson
ISL1	RNH1	-0.0412101	0.402974	pearson
CHDH	RNH1	-0.155575	0.00149697	pearson
IL20RA	RNH1	-0.179041	0.000250694	pearson
CLCA1	RNH1	-0.0112195	0.819957	pearson
CLCA4	RNH1	-0.0531776	0.280367	pearson
GLT8D1	RNH1	-0.197107	5.39e-05	pearson
ATP2C1	RNH1	-0.140595	0.00415317	pearson
IGF1	RNH1	0.0856787	0.0816421	pearson
SLC38A5	RNH1	0.306292	1.93e-10	pearson
RALBP1	RNH1	-0.265049	4.38e-08	pearson
RUFY3	RNH1	-0.199914	4.19e-05	pearson
CNTN1	RNH1	-0.00511215	0.917405	pearson
SLC11A1	RNH1	0.254955	1.45e-07	pearson
WWTR1	RNH1	0.211297	1.46e-05	pearson
AGPS	RNH1	0.0547529	0.266343	pearson
CXorf56	RNH1	0.0499015	0.311105	pearson
ATP1A2	RNH1	-0.0209572	0.67071	pearson
TTC27	RNH1	0.0207833	0.673285	pearson
ZNF582	RNH1	-0.117572	0.0166969	pearson
VSIG2	RNH1	-0.205433	2.53e-05	pearson
PHLDB1	RNH1	0.252285	1.97e-07	pearson
MARCO	RNH1	0.166525	0.000669401	pearson
CYP24A1	RNH1	-0.0641617	0.192611	pearson
PRDM11	RNH1	0.176074	0.00031834	pearson
SYT13	RNH1	-0.0508911	0.301595	pearson
SNAI2	RNH1	0.285042	3.52e-09	pearson
CD74	RNH1	0.196211	5.84e-05	pearson
HGF	RNH1	0.0815166	0.097649	pearson
ZRANB1	RNH1	-0.0377877	0.443192	pearson
NCDN	RNH1	0.121397	0.0134459	pearson
ADGRA2	RNH1	0.116801	0.0174299	pearson
ZFP64	RNH1	0.06988	0.155816	pearson
MNAT1	RNH1	0.108284	0.0275903	pearson
SAMD4A	RNH1	0.196005	5.94e-05	pearson
RUNX3	RNH1	0.232564	1.72e-06	pearson
MRE11	RNH1	-0.201914	3.49e-05	pearson
PLEKHB1	RNH1	-0.144567	0.00319714	pearson
SERPINB1	RNH1	0.279577	7.16e-09	pearson
CYP3A43	RNH1	-0.0798472	0.104733	pearson
SLC7A9	RNH1	-0.210894	1.51e-05	pearson
SPAST	RNH1	-0.284137	3.97e-09	pearson
NRXN3	RNH1	-0.209728	1.69e-05	pearson
OSBPL5	RNH1	0.416386	8.61e-19	pearson
AQR	RNH1	-0.178263	0.000266997	pearson
CPS1	RNH1	-0.0476012	0.333964	pearson
C8B	RNH1	-0.11309	0.0213651	pearson
FHL1	RNH1	0.0993343	0.0433792	pearson
RTF2	RNH1	0.039217	0.426124	pearson
GABRA1	RNH1	-0.0268446	0.585991	pearson
NLRP2	RNH1	-0.0862629	0.0795758	pearson
SLC45A4	RNH1	-0.0196325	0.690414	pearson
RNF10	RNH1	-0.20332	3.07e-05	pearson
ZNF839	RNH1	-0.134695	0.0060533	pearson
ZDHHC6	RNH1	-0.266654	3.6e-08	pearson
GRAMD1B	RNH1	0.106666	0.0300103	pearson
RNH1	RNH1	1	0	pearson
NDUFS1	RNH1	-0.0795395	0.106082	pearson
RB1CC1	RNH1	-0.141211	0.00398987	pearson
ERP44	RNH1	0.118558	0.0157996	pearson
ALAS1	RNH1	-0.226571	3.21e-06	pearson
BIRC3	RNH1	0.112663	0.0218639	pearson
AKAP11	RNH1	-0.140168	0.00426991	pearson
GLRX2	RNH1	0.032775	0.506028	pearson
SNAPC1	RNH1	0.213182	1.21e-05	pearson
DERA	RNH1	0.0867533	0.0778741	pearson
STRAP	RNH1	0.0865165	0.0786919	pearson
ABCC2	RNH1	0.0368218	0.454943	pearson
DEF6	RNH1	0.0198798	0.68672	pearson
PLEKHO1	RNH1	0.20145	3.64e-05	pearson
GCLM	RNH1	0.0899679	0.0674369	pearson
UBR2	RNH1	-0.128701	0.00874988	pearson
EHD2	RNH1	0.417884	6.28e-19	pearson
DEPDC1	RNH1	-0.0499692	0.310448	pearson
CCDC28A	RNH1	-0.0584873	0.235047	pearson
RRAGD	RNH1	0.0552967	0.261617	pearson
HSF2	RNH1	-0.168083	0.000594515	pearson
PHF20	RNH1	-0.103099	0.0359936	pearson
HSD17B6	RNH1	0.0539237	0.273664	pearson
NR1H3	RNH1	0.0882345	0.0729125	pearson
TYMP	RNH1	0.311823	8.7e-11	pearson
NCAPH2	RNH1	0.0703914	0.152804	pearson
TOMM34	RNH1	-0.0505782	0.30458	pearson
SEC63	RNH1	-0.0736145	0.134827	pearson
KPNA6	RNH1	-0.0699229	0.155562	pearson
VIM	RNH1	0.359192	4.72e-14	pearson
RTEL1-TNFRSF6B	RNH1	-0.145312	0.00304197	pearson
FAS	RNH1	0.217612	7.89e-06	pearson
RNASET2	RNH1	-0.0529096	0.282801	pearson
CD44	RNH1	0.309536	1.21e-10	pearson
KCNG1	RNH1	-0.11248	0.0220805	pearson
AGPAT4	RNH1	0.272294	1.8e-08	pearson
SLAMF7	RNH1	0.131908	0.00719724	pearson
BTN3A1	RNH1	0.0906997	0.0652287	pearson
MIPEP	RNH1	0.109972	0.0252455	pearson
PRKCH	RNH1	-0.149138	0.0023473	pearson
INSRR	RNH1	0.0132847	0.787546	pearson
IFNGR1	RNH1	0.167297	0.000631234	pearson
B4GALT7	RNH1	0.0914454	0.06304	pearson
SH2D2A	RNH1	0.0573029	0.244679	pearson
VRK2	RNH1	-0.0358114	0.467419	pearson
TNFRSF1B	RNH1	0.258637	9.42e-08	pearson
VEZT	RNH1	-0.0627246	0.202787	pearson
POU2F2	RNH1	0.0555375	0.259542	pearson
BRD9	RNH1	-0.0776338	0.114745	pearson
SNX1	RNH1	0.0162225	0.742079	pearson
TBPL1	RNH1	-0.00563681	0.908963	pearson
ARNTL2	RNH1	0.196266	5.81e-05	pearson
BCLAF1	RNH1	-0.234063	1.47e-06	pearson
SLC39A9	RNH1	-0.0499717	0.310424	pearson
ANK1	RNH1	0.144411	0.00323062	pearson
IBSP	RNH1	0.122305	0.0127608	pearson
TFB1M	RNH1	0.0184663	0.707936	pearson
RABEP1	RNH1	0.00323647	0.947654	pearson
HMGB3	RNH1	-0.0566654	0.249976	pearson
NUP160	RNH1	-0.00269849	0.956345	pearson
BAK1	RNH1	0.263552	5.24e-08	pearson
MUSK	RNH1	-0.0602525	0.221193	pearson
IKZF2	RNH1	-0.324486	1.32e-11	pearson
GRN	RNH1	0.258527	9.54e-08	pearson
FAM13B	RNH1	-0.172476	0.000423152	pearson
ARHGAP31	RNH1	0.0744041	0.130682	pearson
CENPQ	RNH1	-0.00897756	0.85549	pearson
RANBP3	RNH1	-0.115127	0.0191195	pearson
ARID4A	RNH1	-0.233289	1.6e-06	pearson
EIPR1	RNH1	-0.0879899	0.0737135	pearson
PNPLA6	RNH1	0.144654	0.00317871	pearson
IFT88	RNH1	-0.14265	0.0036304	pearson
ALG1	RNH1	0.270951	2.13e-08	pearson
ZCCHC8	RNH1	-0.242262	6.07e-07	pearson
ABCF2	RNH1	0.153919	0.00168342	pearson
CHPF2	RNH1	0.318903	3.07e-11	pearson
LRRC7	RNH1	-0.131742	0.00727142	pearson
FUT8	RNH1	-0.0206132	0.675807	pearson
UBA6	RNH1	-0.0392511	0.425722	pearson
GAB2	RNH1	-0.181186	0.000210418	pearson
ATP6V0A1	RNH1	-0.00755904	0.878129	pearson
PIAS1	RNH1	-0.0470181	0.339926	pearson
SLC4A7	RNH1	-0.192193	8.3e-05	pearson
APBA2	RNH1	-0.0373565	0.448416	pearson
MAP2K3	RNH1	0.131009	0.00760552	pearson
EFCAB1	RNH1	0.113827	0.0205275	pearson
TMSB10	RNH1	0.123371	0.0119966	pearson
ASTE1	RNH1	-0.211014	1.5e-05	pearson
RNF19A	RNH1	-0.235436	1.27e-06	pearson
PEX3	RNH1	0.0980916	0.0460813	pearson
GABARAPL2	RNH1	-0.0719134	0.144101	pearson
MYOC	RNH1	0.0372588	0.449604	pearson
SH3YL1	RNH1	-0.339396	1.28e-12	pearson
FAM136A	RNH1	-0.222482	4.86e-06	pearson
VCL	RNH1	0.128521	0.00884511	pearson
DEPDC1B	RNH1	-0.0782006	0.112112	pearson
DAPK2	RNH1	-0.0568781	0.248199	pearson
NSMAF	RNH1	-0.0752171	0.126518	pearson
STAP1	RNH1	0.00559966	0.909561	pearson
TIMP2	RNH1	0.216664	8.66e-06	pearson
RFC1	RNH1	-0.0601005	0.222362	pearson
TBC1D23	RNH1	-0.13248	0.00694801	pearson
CUL3	RNH1	-0.0712963	0.147583	pearson
MYOM2	RNH1	0.118318	0.0160136	pearson
OTC	RNH1	-0.023956	0.626947	pearson
CYP46A1	RNH1	0.00331371	0.946406	pearson
AC118549.1	RNH1	-0.18721	0.000127331	pearson
SLC18A1	RNH1	0.0357479	0.468209	pearson
USP2	RNH1	-0.00590618	0.904633	pearson
CASR	RNH1	-0.0390777	0.427771	pearson
TUBG2	RNH1	-0.0181342	0.712955	pearson
RPL26L1	RNH1	0.228767	2.56e-06	pearson
FLT4	RNH1	-0.0428181	0.384856	pearson
NSUN2	RNH1	-0.0104954	0.831398	pearson
FBXO42	RNH1	-0.100528	0.040911	pearson
MFAP3	RNH1	-0.0806263	0.101378	pearson
MRI1	RNH1	-0.101187	0.0395992	pearson
METTL1	RNH1	-0.0123208	0.802631	pearson
HOXC8	RNH1	0.0807606	0.100808	pearson
AGA	RNH1	0.0117453	0.811673	pearson
PI4K2B	RNH1	-0.0465824	0.344424	pearson
BOD1L1	RNH1	-0.203484	3.03e-05	pearson
MAT2B	RNH1	0.0558651	0.256737	pearson
TLL1	RNH1	0.31981	2.68e-11	pearson
EDC4	RNH1	-0.0517615	0.293391	pearson
TRIO	RNH1	0.0431705	0.380952	pearson
VCAN	RNH1	0.128376	0.00892308	pearson
CLEC16A	RNH1	-0.0456596	0.354077	pearson
MSR1	RNH1	0.116865	0.0173681	pearson
CDH1	RNH1	-0.262712	5.8e-08	pearson
MTREX	RNH1	-0.0560414	0.255237	pearson
DNAH5	RNH1	0.0616634	0.210547	pearson
ZFYVE16	RNH1	-0.240322	7.51e-07	pearson
RIPOR1	RNH1	0.215356	9.84e-06	pearson
C6	RNH1	0.00155587	0.974822	pearson
RAI14	RNH1	-0.0570631	0.246662	pearson
SOX30	RNH1	0.0469795	0.340323	pearson
PNKP	RNH1	-0.142253	0.00372646	pearson
BEST2	RNH1	0.0884167	0.0723204	pearson
PHLPP2	RNH1	-0.0813232	0.0984494	pearson
SPDL1	RNH1	-0.0162467	0.741707	pearson
STAU2	RNH1	-0.223917	4.21e-06	pearson
CTNS	RNH1	0.0409129	0.406378	pearson
RTN4R	RNH1	0.0487176	0.322738	pearson
PHF23	RNH1	0.14267	0.00362554	pearson
CDH10	RNH1	0.00514332	0.916903	pearson
INPP4A	RNH1	-0.255056	1.43e-07	pearson
RAB27B	RNH1	-0.0492797	0.31718	pearson
PSMA4	RNH1	0.0647297	0.188694	pearson
MYO16	RNH1	0.121677	0.0132309	pearson
LSG1	RNH1	-0.228069	2.75e-06	pearson
PARP3	RNH1	0.134632	0.00607737	pearson
TNC	RNH1	0.357854	5.94e-14	pearson
THAP3	RNH1	-0.142809	0.0035926	pearson
RIPOR3	RNH1	-0.0128845	0.7938	pearson
TDP1	RNH1	-0.129944	0.00811596	pearson
AIFM2	RNH1	0.0845863	0.0856225	pearson
C2orf83	RNH1	-0.0671989	0.172346	pearson
MED17	RNH1	-0.0747343	0.128978	pearson
RETSAT	RNH1	-0.0150442	0.760217	pearson
CAPG	RNH1	0.0778934	0.113533	pearson
AP2S1	RNH1	0.304254	2.57e-10	pearson
USH2A	RNH1	-0.0515537	0.295336	pearson
ZPBP	RNH1	-0.0992496	0.0435589	pearson
TG	RNH1	0.0497704	0.312379	pearson
ADAM28	RNH1	0.0350324	0.477167	pearson
BARX2	RNH1	0.131291	0.00747523	pearson
DCUN1D1	RNH1	-0.208499	1.9e-05	pearson
JADE2	RNH1	0.0607605	0.217316	pearson
ZIC2	RNH1	0.0460734	0.349728	pearson
LCP2	RNH1	0.258172	9.95e-08	pearson
TRIT1	RNH1	-0.266935	3.48e-08	pearson
ADRB1	RNH1	-0.15377	0.00170122	pearson
GUCA2B	RNH1	-0.121745	0.0131798	pearson
CUL7	RNH1	-0.0776483	0.114677	pearson
CTNNA1	RNH1	0.0534971	0.277483	pearson
PHKA2	RNH1	-0.275819	1.16e-08	pearson
CNTLN	RNH1	0.0711805	0.148244	pearson
EPHA3	RNH1	0.0150301	0.760434	pearson
HSPA5	RNH1	0.216047	9.2e-06	pearson
DSG2	RNH1	-0.022733	0.644648	pearson
GEMIN8	RNH1	-0.229879	2.28e-06	pearson
OFD1	RNH1	-0.297742	6.39e-10	pearson
GPM6B	RNH1	-0.0310048	0.529285	pearson
MAGEC2	RNH1	-0.0552311	0.262183	pearson
PREX2	RNH1	-0.0895294	0.0687891	pearson
WDR37	RNH1	-0.10434	0.0338058	pearson
YTHDC2	RNH1	-0.172663	0.000416993	pearson
CTPS2	RNH1	-0.342452	7.8e-13	pearson
ATP6V1H	RNH1	0.165409	0.000728313	pearson
POLR2B	RNH1	-0.144007	0.00331873	pearson
FAM214A	RNH1	-0.261975	6.34e-08	pearson
ARAP2	RNH1	-0.102925	0.0363103	pearson
TPR	RNH1	-0.219036	6.86e-06	pearson
CP	RNH1	0.0225343	0.647544	pearson
KIAA0556	RNH1	-0.205104	2.61e-05	pearson
DTNBP1	RNH1	-0.0291109	0.554753	pearson
XK	RNH1	-0.226584	3.21e-06	pearson
ANO2	RNH1	-0.0778077	0.113932	pearson
C12orf4	RNH1	0.035289	0.473944	pearson
SCML1	RNH1	-0.0942816	0.0552611	pearson
WWC3	RNH1	0.0532806	0.279434	pearson
ARHGAP6	RNH1	-0.0268541	0.585859	pearson
FAM184B	RNH1	-0.274916	1.29e-08	pearson
MAP4	RNH1	0.212901	1.25e-05	pearson
GOPC	RNH1	0.0322841	0.512423	pearson
ROS1	RNH1	0.0533805	0.278533	pearson
USP28	RNH1	0.0380825	0.43964	pearson
HDAC9	RNH1	0.0551843	0.262589	pearson
TSPAN17	RNH1	0.22442	4e-06	pearson
NOP16	RNH1	0.0625881	0.203773	pearson
CC2D2A	RNH1	-0.0822959	0.0944753	pearson
RRM2B	RNH1	-0.0958296	0.051363	pearson
ZNF800	RNH1	-0.319509	2.8e-11	pearson
TNFRSF17	RNH1	0.0389648	0.429107	pearson
SNX29	RNH1	0.0608118	0.216928	pearson
LMO3	RNH1	-0.0729654	0.13831	pearson
MRPS10	RNH1	0.125442	0.0106263	pearson
GUCA1A	RNH1	0.00810991	0.869325	pearson
RSF1	RNH1	-0.185132	0.000151694	pearson
VPS13D	RNH1	-0.111171	0.0236872	pearson
CELF2	RNH1	0.145317	0.00304086	pearson
FAM120A	RNH1	-0.00224632	0.963655	pearson
R3HDM1	RNH1	-0.0680903	0.166711	pearson
COL9A2	RNH1	-0.0408629	0.406952	pearson
KITLG	RNH1	0.0534961	0.277492	pearson
ERCC8	RNH1	-0.026471	0.591218	pearson
ADAMTS6	RNH1	0.128427	0.00889572	pearson
H6PD	RNH1	0.0815984	0.0973117	pearson
VAMP3	RNH1	0.250663	2.37e-07	pearson
PER3	RNH1	0.0898297	0.0678607	pearson
UTS2	RNH1	-0.0322084	0.513413	pearson
TNFRSF9	RNH1	0.169558	0.000530846	pearson
EPN3	RNH1	-0.226712	3.17e-06	pearson
LTBP1	RNH1	0.0720674	0.143242	pearson
RCN1	RNH1	-0.0888968	0.070779	pearson
ELN	RNH1	0.0839688	0.0879409	pearson
RFC2	RNH1	-0.0133622	0.786337	pearson
ARID1B	RNH1	-0.115707	0.0185183	pearson
CLPTM1L	RNH1	0.0408503	0.407097	pearson
NEDD4L	RNH1	-0.242102	6.18e-07	pearson
FOXP3	RNH1	0.226068	3.38e-06	pearson
PPP1R3F	RNH1	-0.0399366	0.417679	pearson
HEXB	RNH1	0.339503	1.26e-12	pearson
PTCD2	RNH1	0.00364375	0.941078	pearson
NEXMIF	RNH1	-0.0745126	0.13012	pearson
JKAMP	RNH1	0.172684	0.000416312	pearson
DKK3	RNH1	0.336844	1.92e-12	pearson
ARHGEF5	RNH1	0.136697	0.00533536	pearson
NFE2L3	RNH1	-0.0921632	0.0609908	pearson
MCUR1	RNH1	-0.13347	0.00653459	pearson
LIMA1	RNH1	0.223899	4.22e-06	pearson
LETMD1	RNH1	-0.239523	8.19e-07	pearson
SLC4A8	RNH1	-0.0534512	0.277895	pearson
LAMC3	RNH1	0.107218	0.0291647	pearson
PTGER3	RNH1	0.0913591	0.0632902	pearson
TNIP3	RNH1	0.129879	0.0081483	pearson
MAPK9	RNH1	-0.0947798	0.0539805	pearson
COL23A1	RNH1	0.189829	0.000101841	pearson
BCAR1	RNH1	0.338106	1.57e-12	pearson
FAM160A2	RNH1	0.228325	2.68e-06	pearson
HERPUD1	RNH1	-0.0313922	0.524149	pearson
HOMER3	RNH1	0.225363	3.63e-06	pearson
RAD51	RNH1	-0.0646395	0.189312	pearson
POLQ	RNH1	-0.284377	3.84e-09	pearson
PIK3CB	RNH1	-0.172844	0.0004111	pearson
CYBA	RNH1	0.187148	0.000128	pearson
THOC3	RNH1	0.0137224	0.780722	pearson
HEBP2	RNH1	-0.244476	4.76e-07	pearson
MPHOSPH9	RNH1	-0.131648	0.00731361	pearson
PLEKHA5	RNH1	-0.297726	6.4e-10	pearson
PRSS8	RNH1	-0.0186921	0.70453	pearson
SIKE1	RNH1	-0.186827	0.000131517	pearson
RRP12	RNH1	0.224198	4.09e-06	pearson
FNIP2	RNH1	-0.0455836	0.354879	pearson
MSMO1	RNH1	-0.0647913	0.188273	pearson
TTC17	RNH1	-0.126226	0.0101453	pearson
ALX4	RNH1	0.0796215	0.105721	pearson
FSTL4	RNH1	-0.048631	0.323601	pearson
FOXN3	RNH1	-0.0679075	0.167856	pearson
METTL24	RNH1	-0.0422948	0.390697	pearson
AKR7A2	RNH1	0.00692657	0.888257	pearson
MRTO4	RNH1	0.0646433	0.189286	pearson
NNAT	RNH1	-0.0689567	0.161367	pearson
USE1	RNH1	-0.0994519	0.0431304	pearson
MCF2L2	RNH1	-0.131071	0.00757673	pearson
NRIP2	RNH1	-0.233513	1.56e-06	pearson
LAMA3	RNH1	0.202472	3.32e-05	pearson
AP5M1	RNH1	-0.131478	0.00739033	pearson
ANAPC4	RNH1	-0.180816	0.000216904	pearson
KCNQ1	RNH1	0.0743314	0.131059	pearson
TRAPPC3	RNH1	0.052238	0.288964	pearson
THRAP3	RNH1	-0.0140109	0.776233	pearson
PHPT1	RNH1	0.151337	0.00201682	pearson
ENTPD2	RNH1	-0.0686847	0.163031	pearson
LY75	RNH1	-0.0590687	0.230418	pearson
ARID4B	RNH1	-0.20913	1.79e-05	pearson
OPN3	RNH1	0.153015	0.00179391	pearson
SDCCAG8	RNH1	0.123314	0.0120367	pearson
PTPRN	RNH1	0.0846483	0.0853926	pearson
HHAT	RNH1	-0.0657228	0.181987	pearson
KIF1B	RNH1	-0.0413061	0.401878	pearson
FOXC1	RNH1	0.0461857	0.348553	pearson
TBC1D22A	RNH1	0.183762	0.000170074	pearson
SYNE2	RNH1	-0.0459965	0.350534	pearson
PLEKHH1	RNH1	-0.289774	1.88e-09	pearson
ATP9A	RNH1	-0.152605	0.0018462	pearson
SPO11	RNH1	-0.0434823	0.377519	pearson
CBLN4	RNH1	0.00122343	0.9802	pearson
CHRDL2	RNH1	0.127555	0.00937309	pearson
FAM168A	RNH1	0.00584643	0.905593	pearson
RELT	RNH1	0.171387	0.00046073	pearson
GALC	RNH1	-0.083871	0.0883127	pearson
NOP58	RNH1	-0.0510253	0.30032	pearson
SZRD1	RNH1	0.123339	0.0120188	pearson
KCNH2	RNH1	0.0114441	0.816417	pearson
CUL1	RNH1	-0.0724041	0.141377	pearson
FAM114A2	RNH1	-0.00522202	0.915636	pearson
CYFIP2	RNH1	-0.211074	1.49e-05	pearson
TAB2	RNH1	-0.0315302	0.522327	pearson
GINM1	RNH1	0.175276	0.000339223	pearson
EIF2AK2	RNH1	0.00511728	0.917322	pearson
AC022966.1	RNH1	NA	NA	pearson
KMT2C	RNH1	-0.201822	3.52e-05	pearson
MCOLN3	RNH1	0.095062	0.0532662	pearson
CCDC85A	RNH1	-0.0425169	0.388211	pearson
PUM2	RNH1	-0.338143	1.56e-12	pearson
MRPL43	RNH1	0.0285909	0.561848	pearson
ITIH4	RNH1	-0.0323063	0.512133	pearson
ITIH1	RNH1	-0.0736476	0.134652	pearson
HPF1	RNH1	0.0537767	0.274975	pearson
ZFR	RNH1	-0.110648	0.0243564	pearson
ZNF280C	RNH1	-0.142007	0.00378714	pearson
NPFFR2	RNH1	0.0190364	0.69935	pearson
PHF21B	RNH1	-0.0533647	0.278675	pearson
TRAF1	RNH1	0.0927145	0.0594544	pearson
RC3H2	RNH1	-0.0360465	0.4645	pearson
IL17RB	RNH1	-0.15916	0.00115658	pearson
TRAF3IP2	RNH1	0.222186	5.01e-06	pearson
GYG2	RNH1	-0.108695	0.0270019	pearson
DCBLD2	RNH1	0.214035	1.12e-05	pearson
SERPINB3	RNH1	0.146467	0.00281472	pearson
SOAT1	RNH1	0.0552581	0.26195	pearson
PKP2	RNH1	-0.111004	0.0238983	pearson
MSH4	RNH1	-0.173431	0.000392571	pearson
F7	RNH1	-0.138443	0.00477276	pearson
GDI2	RNH1	-0.0110999	0.821844	pearson
PRDM1	RNH1	0.151963	0.00193082	pearson
ATG5	RNH1	0.00279981	0.954708	pearson
TMCC3	RNH1	0.155452	0.00151014	pearson
PITHD1	RNH1	-0.114588	0.0196921	pearson
MTA3	RNH1	-0.200428	4e-05	pearson
USP13	RNH1	-0.00974206	0.843337	pearson
ATP11B	RNH1	-0.18241	0.000190242	pearson
LAMC2	RNH1	0.151641	0.00197466	pearson
CDK14	RNH1	0.0591165	0.23004	pearson
SEC61A1	RNH1	0.0609399	0.215959	pearson
PPP1R12A	RNH1	-0.106068	0.030949	pearson
RASGRF1	RNH1	0.106424	0.0303873	pearson
CAMK2B	RNH1	-0.0312311	0.526282	pearson
CROCC	RNH1	-0.0786484	0.110066	pearson
POLR3E	RNH1	-0.149445	0.00229837	pearson
ATP2B4	RNH1	0.0571423	0.246005	pearson
ZC3H11A	RNH1	-0.160821	0.00102443	pearson
RIOK2	RNH1	0.0379466	0.441275	pearson
YIPF1	RNH1	0.162924	0.000877062	pearson
NDC1	RNH1	-0.124061	0.0115237	pearson
DGKG	RNH1	0.0515802	0.295088	pearson
FLYWCH1	RNH1	0.116658	0.0175687	pearson
UNKL	RNH1	-0.0627979	0.202258	pearson
TBXAS1	RNH1	0.25423	1.57e-07	pearson
PARP12	RNH1	0.236734	1.11e-06	pearson
ALDH18A1	RNH1	-0.124501	0.0112307	pearson
TARBP1	RNH1	-0.167753	0.000609701	pearson
GATB	RNH1	0.0124406	0.800753	pearson
MXD1	RNH1	-0.0220984	0.653914	pearson
CDK17	RNH1	-0.0693847	0.158776	pearson
DNAJC25	RNH1	-0.0258794	0.599538	pearson
SLC2A3	RNH1	0.0819259	0.0959715	pearson
PSD	RNH1	0.0940146	0.0559575	pearson
CTDP1	RNH1	0.145331	0.00303807	pearson
YBX3	RNH1	0.223573	4.36e-06	pearson
STYK1	RNH1	-0.134154	0.00626173	pearson
WNK1	RNH1	-0.0188585	0.702026	pearson
CCAR1	RNH1	-0.271609	1.96e-08	pearson
OGFR	RNH1	0.140876	0.00407778	pearson
GNA15	RNH1	0.201034	3.79e-05	pearson
CREB3L3	RNH1	-0.0797239	0.105272	pearson
PIGV	RNH1	-0.0276437	0.574884	pearson
PTPRU	RNH1	-0.0722711	0.142112	pearson
SNRNP40	RNH1	0.0451074	0.359934	pearson
RIMBP2	RNH1	-0.0692147	0.159802	pearson
COL11A1	RNH1	0.135198	0.00586538	pearson
QSER1	RNH1	-0.0122349	0.803979	pearson
MPC1	RNH1	-0.108466	0.0273284	pearson
ACAA1	RNH1	-0.24663	3.74e-07	pearson
BCAT1	RNH1	0.104931	0.032804	pearson
HDAC7	RNH1	-0.0782598	0.11184	pearson
LZTS1	RNH1	0.0399691	0.417299	pearson
PRDM6	RNH1	0.0320802	0.515092	pearson
WNT8A	RNH1	-0.124307	0.0113592	pearson
SPAG4	RNH1	-0.211214	1.47e-05	pearson
NCKAP1	RNH1	-0.0934782	0.057379	pearson
MRPS35	RNH1	-0.0672271	0.172165	pearson
GUCY1B1	RNH1	0.0561463	0.254348	pearson
SFSWAP	RNH1	-0.243017	5.59e-07	pearson
TNK2	RNH1	-0.220673	5.83e-06	pearson
MON2	RNH1	-0.256624	1.19e-07	pearson
CDH3	RNH1	0.299596	4.94e-10	pearson
ARSF	RNH1	-0.0121269	0.805676	pearson
GPBP1	RNH1	-0.0855115	0.0822416	pearson
DGAT2	RNH1	-0.220237	6.09e-06	pearson
ZNF112	RNH1	-0.222072	5.07e-06	pearson
CS	RNH1	-0.0356035	0.470011	pearson
LTK	RNH1	0.070746	0.150741	pearson
MRPS24	RNH1	0.308804	1.35e-10	pearson
ELMO2	RNH1	-0.0080666	0.870017	pearson
WAPL	RNH1	-0.138034	0.00489948	pearson
VMP1	RNH1	-0.0147006	0.765532	pearson
APPBP2	RNH1	-0.188505	0.00011406	pearson
POLD1	RNH1	0.0853929	0.0826689	pearson
SEZ6	RNH1	-0.0746376	0.129475	pearson
EIF4B	RNH1	-0.0781294	0.11244	pearson
SLC6A16	RNH1	-0.102837	0.0364697	pearson
BICRA	RNH1	-0.277389	9.47e-09	pearson
SPHK2	RNH1	-0.230394	2.16e-06	pearson
RPL18	RNH1	-0.124317	0.0113525	pearson
CA11	RNH1	0.0947887	0.053958	pearson
ISOC2	RNH1	0.080091	0.103674	pearson
U2AF2	RNH1	-0.141649	0.00387711	pearson
EPN1	RNH1	0.199382	4.4e-05	pearson
MED29	RNH1	-0.136779	0.00530771	pearson
AHRR	RNH1	0.00763163	0.876968	pearson
GSC2	RNH1	0.021464	0.66323	pearson
ZNF275	RNH1	-0.237776	9.89e-07	pearson
MTMR1	RNH1	-0.0736617	0.134577	pearson
GPC1	RNH1	0.245598	4.2e-07	pearson
ADCK1	RNH1	0.100721	0.0405218	pearson
HAGH	RNH1	-0.229064	2.48e-06	pearson
RNF4	RNH1	-0.0703662	0.152951	pearson
CASP8	RNH1	-0.0304602	0.536547	pearson
LIMCH1	RNH1	-0.232842	1.67e-06	pearson
INTS13	RNH1	0.0172264	0.726736	pearson
TM7SF3	RNH1	-0.0444943	0.366507	pearson
DLX3	RNH1	-0.0291838	0.553761	pearson
SPA17	RNH1	-0.047863	0.331309	pearson
TSPAN32	RNH1	0.216985	8.4e-06	pearson
CCN5	RNH1	0.0915693	0.0626821	pearson
DMRT3	RNH1	-0.0187058	0.704325	pearson
ST3GAL6	RNH1	0.118273	0.0160541	pearson
ATP2C2	RNH1	-0.11351	0.0208838	pearson
NGFR	RNH1	0.137695	0.00500704	pearson
CDON	RNH1	0.0632045	0.199346	pearson
TAF2	RNH1	-0.151777	0.00195607	pearson
HIPK2	RNH1	0.106257	0.0306501	pearson
TNPO3	RNH1	-0.182978	0.000181508	pearson
BORCS8-MEF2B	RNH1	0.0826334	0.0931269	pearson
RFXANK	RNH1	-0.0403516	0.412853	pearson
TMEM161A	RNH1	-0.0318404	0.51824	pearson
LPAR2	RNH1	-0.249866	2.6e-07	pearson
CTSA	RNH1	0.201303	3.69e-05	pearson
SUGP2	RNH1	-0.185563	0.000146301	pearson
SLC12A2	RNH1	-0.0785952	0.110308	pearson
SNX24	RNH1	0.0529276	0.282637	pearson
EYA2	RNH1	-0.0229401	0.641637	pearson
CNN2	RNH1	0.307469	1.63e-10	pearson
ABCA7	RNH1	-0.0210883	0.668772	pearson
SNCAIP	RNH1	-0.0958744	0.0512538	pearson
DDX20	RNH1	-0.135054	0.00591851	pearson
BTBD1	RNH1	-0.0798423	0.104754	pearson
FAR2	RNH1	-0.30875	1.36e-10	pearson
BCAS1	RNH1	-0.179277	0.000245926	pearson
POU1F1	RNH1	-0.0263507	0.592906	pearson
CHI3L2	RNH1	0.097127	0.0482752	pearson
SBNO2	RNH1	0.182094	0.000195282	pearson
PMS1	RNH1	-0.294785	9.58e-10	pearson
HMG20B	RNH1	0.00424059	0.931448	pearson
CALCRL	RNH1	-0.0605839	0.218659	pearson
TAF11	RNH1	-0.132859	0.00678712	pearson
ANKS1A	RNH1	-0.18649	0.000135316	pearson
AP3D1	RNH1	0.0360338	0.464658	pearson
ZNF76	RNH1	-0.134506	0.00612543	pearson
SLC9A3R2	RNH1	0.164174	0.000799038	pearson
NTHL1	RNH1	-0.0474727	0.335271	pearson
UHRF1BP1	RNH1	-0.125265	0.0107376	pearson
GNAI3	RNH1	0.115079	0.01917	pearson
IPO5	RNH1	-0.0317571	0.519335	pearson
OAT	RNH1	0.135543	0.00573934	pearson
WDR3	RNH1	-0.0464688	0.345603	pearson
PKN2	RNH1	-0.232386	1.76e-06	pearson
WDR18	RNH1	-0.00140982	0.977185	pearson
TRAM2	RNH1	0.235361	1.28e-06	pearson
NTN1	RNH1	0.06397	0.193947	pearson
GLP2R	RNH1	0.102633	0.0368448	pearson
MCM10	RNH1	-0.0202792	0.680767	pearson
DGKA	RNH1	-0.107768	0.0283423	pearson
ERBB3	RNH1	-0.325796	1.08e-11	pearson
ROPN1	RNH1	0.0833664	0.0902507	pearson
ANKRD44	RNH1	0.0212697	0.666095	pearson
ADAT1	RNH1	-0.0785396	0.110561	pearson
PDIA5	RNH1	-0.0226755	0.645486	pearson
TBC1D22B	RNH1	-0.117928	0.0163683	pearson
NDUFB4	RNH1	-0.144071	0.00330461	pearson
SPEN	RNH1	-0.164824	0.000761069	pearson
MYLK	RNH1	0.103463	0.0353401	pearson
ZC3H15	RNH1	-0.144614	0.00318717	pearson
MAP2K4	RNH1	-0.138471	0.0047642	pearson
SNAP91	RNH1	-0.181795	0.000200152	pearson
SLK	RNH1	-0.0943233	0.055153	pearson
CYB5R4	RNH1	-0.0507136	0.303287	pearson
COL17A1	RNH1	0.277617	9.2e-09	pearson
GSTO2	RNH1	-0.152329	0.00188219	pearson
SEC61A2	RNH1	-0.22633	3.29e-06	pearson
PRKCQ	RNH1	0.162692	0.000892339	pearson
TLE2	RNH1	-0.215032	1.02e-05	pearson
ASB1	RNH1	0.148496	0.00245263	pearson
FAM107B	RNH1	-0.16225	0.000922019	pearson
ME1	RNH1	0.135926	0.00560226	pearson
TBC1D1	RNH1	-0.216112	9.14e-06	pearson
CDK13	RNH1	-0.230283	2.19e-06	pearson
MTHFD2	RNH1	0.0103394	0.833866	pearson
SLC9A7	RNH1	-0.0940533	0.0558563	pearson
FOXJ2	RNH1	0.0255085	0.604782	pearson
YBX1	RNH1	-0.00255893	0.958601	pearson
PPP2R5A	RNH1	0.028957	0.556848	pearson
CTNNA2	RNH1	-0.047041	0.33969	pearson
ELAVL1	RNH1	-0.232753	1.69e-06	pearson
TIE1	RNH1	0.077565	0.115068	pearson
DIP2B	RNH1	0.00163954	0.973468	pearson
SMARCD1	RNH1	-0.0583593	0.236074	pearson
KDM4A	RNH1	-0.120356	0.0142702	pearson
NFYC	RNH1	-0.16161	0.000966668	pearson
ZMYND12	RNH1	-0.160547	0.0010452	pearson
SLC9A3	RNH1	-0.0180934	0.713572	pearson
NGEF	RNH1	0.0411418	0.403754	pearson
ASPM	RNH1	-0.0901458	0.0668944	pearson
CD84	RNH1	0.164068	0.00080542	pearson
ELOVL1	RNH1	-0.127419	0.0094498	pearson
SPI1	RNH1	0.400862	2.06e-17	pearson
ZNRD1	RNH1	-0.0789632	0.108646	pearson
MPPED2	RNH1	-0.0396586	0.420929	pearson
CLDN18	RNH1	-0.00361331	0.941569	pearson
ZBTB11	RNH1	-0.242292	6.05e-07	pearson
ATXN3	RNH1	-0.139978	0.00432296	pearson
GOLGA5	RNH1	-0.0881041	0.0733389	pearson
FGFR2	RNH1	-0.050771	0.302738	pearson
LRRC40	RNH1	-0.122823	0.0123844	pearson
ISOC1	RNH1	-0.238615	9.04e-07	pearson
EML1	RNH1	0.0353371	0.473341	pearson
TRMT11	RNH1	-0.0839563	0.0879884	pearson
THUMPD1	RNH1	-0.184414	0.000161085	pearson
MSANTD3	RNH1	0.29603	8.08e-10	pearson
KIF26A	RNH1	0.153686	0.00171125	pearson
ATG2B	RNH1	-0.146939	0.00272634	pearson
ARFGEF1	RNH1	-0.199393	4.39e-05	pearson
ACSM2B	RNH1	-0.0930814	0.0584496	pearson
ZFAT	RNH1	0.0401202	0.415539	pearson
MTFR1	RNH1	-0.110802	0.0241572	pearson
STAG3	RNH1	-0.0649374	0.187277	pearson
FECH	RNH1	0.0759497	0.122854	pearson
MYO9A	RNH1	-0.181033	0.000213088	pearson
DDX3Y	RNH1	-0.098649	0.0448524	pearson
PFKP	RNH1	0.195582	6.17e-05	pearson
IDI1	RNH1	-0.0962365	0.0503772	pearson
SP100	RNH1	0.221461	5.39e-06	pearson
KLF6	RNH1	-0.0302023	0.540003	pearson
PLPP1	RNH1	-0.1622	0.000925426	pearson
NEO1	RNH1	-0.0762754	0.121252	pearson
TRAM1	RNH1	-0.0297913	0.545535	pearson
PHKA1	RNH1	-0.087388	0.0757153	pearson
TNFRSF1A	RNH1	0.250026	2.55e-07	pearson
CACNB1	RNH1	-0.169993	0.000513346	pearson
EVI5	RNH1	-0.174232	0.00036851	pearson
STOML1	RNH1	0.217527	7.96e-06	pearson
PKM	RNH1	0.286522	2.9e-09	pearson
DHX29	RNH1	-0.0981062	0.0460489	pearson
DNTTIP2	RNH1	0.0156127	0.751448	pearson
METTL22	RNH1	-0.156736	0.00137784	pearson
TP53BP1	RNH1	-0.165925	0.000700478	pearson
TRO	RNH1	-0.0148815	0.762732	pearson
RRP15	RNH1	0.0201373	0.68288	pearson
RHOA	RNH1	0.205157	2.59e-05	pearson
DHX8	RNH1	-0.0701875	0.154	pearson
PRKCZ	RNH1	-0.0926276	0.0596944	pearson
ZFY	RNH1	-0.0826663	0.092996	pearson
IARS2	RNH1	0.0149243	0.762071	pearson
SYT1	RNH1	-0.122292	0.0127707	pearson
NAV3	RNH1	0.246997	3.59e-07	pearson
IDH3G	RNH1	0.198967	4.56e-05	pearson
ROGDI	RNH1	-0.0524273	0.287218	pearson
PDZD4	RNH1	-0.0280628	0.569099	pearson
ATP2B3	RNH1	-0.0375016	0.446654	pearson
ROCK1	RNH1	-0.0427886	0.385184	pearson
CBFB	RNH1	-0.0986127	0.0449315	pearson
PDK3	RNH1	-0.163798	0.000821796	pearson
HYAL2	RNH1	0.0963186	0.0501802	pearson
HDAC4	RNH1	0.158989	0.00117109	pearson
RASSF1	RNH1	0.182409	0.000190269	pearson
FGFR3	RNH1	-0.101302	0.0393744	pearson
IFI35	RNH1	0.303333	2.93e-10	pearson
HEATR6	RNH1	-0.10154	0.0389113	pearson
COASY	RNH1	-0.0193701	0.694343	pearson
PLEKHH3	RNH1	-0.104621	0.0333257	pearson
MEF2A	RNH1	0.0789281	0.108803	pearson
OTUD5	RNH1	0.0612988	0.213262	pearson
TFE3	RNH1	0.284315	3.87e-09	pearson
TBC1D25	RNH1	0.195846	6.03e-05	pearson
ACSL4	RNH1	-0.00107653	0.982577	pearson
INPP5A	RNH1	-0.0826324	0.0931305	pearson
GPKOW	RNH1	0.0530488	0.281535	pearson
GRIPAP1	RNH1	-0.12637	0.0100585	pearson
FTSJ1	RNH1	0.258442	9.63e-08	pearson
PRR11	RNH1	0.00953207	0.846672	pearson
REEP1	RNH1	-0.00569906	0.907962	pearson
ATP11A	RNH1	0.0226959	0.645188	pearson
POLR1A	RNH1	-0.0301821	0.540275	pearson
LAPTM4A	RNH1	0.0237275	0.630238	pearson
TTC7A	RNH1	0.203163	3.12e-05	pearson
IP6K2	RNH1	-0.264154	4.88e-08	pearson
STON1-GTF2A1L	RNH1	0.0584928	0.235002	pearson
SRBD1	RNH1	-0.0603521	0.220429	pearson
KIF2A	RNH1	0.0273876	0.578433	pearson
RASGRP2	RNH1	0.105243	0.0322864	pearson
PSME4	RNH1	-0.128935	0.00862714	pearson
IFT80	RNH1	-0.239047	8.62e-07	pearson
SIRT2	RNH1	0.0137248	0.780684	pearson
ERLEC1	RNH1	-0.0849616	0.0842379	pearson
PPP2R5B	RNH1	0.202187	3.41e-05	pearson
PYGM	RNH1	0.0620812	0.207467	pearson
PAGE1	RNH1	-0.0190398	0.699299	pearson
PITX1	RNH1	0.180366	0.000225041	pearson
TRPC7	RNH1	-0.153157	0.00177612	pearson
MAST4	RNH1	-0.216405	8.89e-06	pearson
ADGRF5	RNH1	-0.0893984	0.0691976	pearson
SDK2	RNH1	-0.0118917	0.809372	pearson
ADAM7	RNH1	-0.020944	0.670906	pearson
NUP133	RNH1	-0.0332649	0.499688	pearson
NUCKS1	RNH1	-0.0972724	0.0479389	pearson
VPS35	RNH1	-0.19566	6.13e-05	pearson
DNAJA2	RNH1	-0.0815477	0.0975206	pearson
BCL3	RNH1	0.0724057	0.141368	pearson
KCNAB2	RNH1	0.230133	2.22e-06	pearson
ABCC9	RNH1	0.0833877	0.0901681	pearson
GAL	RNH1	-0.0104923	0.831446	pearson
CLEC2D	RNH1	-0.138415	0.00478139	pearson
FUNDC1	RNH1	-0.10654	0.0302057	pearson
MAOB	RNH1	0.0160044	0.745425	pearson
RORA	RNH1	-0.104686	0.0332165	pearson
DRD4	RNH1	0.0159556	0.746174	pearson
TGFBR3	RNH1	-0.239799	7.95e-07	pearson
PLA2G10	RNH1	0.0256272	0.603102	pearson
HES2	RNH1	0.211459	1.43e-05	pearson
ATP1B3	RNH1	0.167933	0.000601362	pearson
NEDD4	RNH1	-0.0903952	0.0661403	pearson
PIGB	RNH1	-0.116658	0.0175691	pearson
MAPK6	RNH1	-0.0444922	0.36653	pearson
GNB5	RNH1	0.140309	0.00423124	pearson
RAB27A	RNH1	0.253682	1.68e-07	pearson
HDHD5	RNH1	-0.111355	0.0234546	pearson
UFD1	RNH1	-0.104814	0.0330003	pearson
LRP6	RNH1	-0.242486	5.92e-07	pearson
GUCY2C	RNH1	-0.0770961	0.117287	pearson
SCT	RNH1	0.210129	1.63e-05	pearson
PHRF1	RNH1	0.321182	2.18e-11	pearson
ELP1	RNH1	0.00530345	0.914326	pearson
NUCB2	RNH1	0.186609	0.000133967	pearson
PFN2	RNH1	-0.10242	0.0372401	pearson
PTPN3	RNH1	0.00634735	0.897547	pearson
SPTB	RNH1	-0.0627564	0.202557	pearson
DAPP1	RNH1	-0.00138334	0.977613	pearson
FGF10	RNH1	0.00416745	0.932628	pearson
SLC44A1	RNH1	-0.118969	0.0154374	pearson
TMEM260	RNH1	-0.297801	6.34e-10	pearson
SMG6	RNH1	0.00851261	0.862899	pearson
EXOC5	RNH1	-0.0435926	0.376309	pearson
CLTCL1	RNH1	0.0324916	0.509715	pearson
FGF22	RNH1	-0.0699461	0.155424	pearson
FSTL3	RNH1	0.226246	3.32e-06	pearson
DGCR2	RNH1	-0.0192765	0.695746	pearson
RNF126	RNH1	-0.0867357	0.0779346	pearson
MNT	RNH1	-0.149875	0.00223133	pearson
ZXDC	RNH1	-0.194827	6.59e-05	pearson
JMJD6	RNH1	0.119583	0.014911	pearson
POLB	RNH1	-0.100292	0.041389	pearson
ST6GALNAC1	RNH1	0.0858118	0.0811675	pearson
WIPI1	RNH1	0.0293421	0.551612	pearson
FRMPD1	RNH1	-0.0424574	0.388876	pearson
GBA2	RNH1	-0.0972358	0.0480235	pearson
NDST1	RNH1	0.199265	4.44e-05	pearson
ASNS	RNH1	-0.150031	0.00220759	pearson
AP3M2	RNH1	-0.147163	0.00268538	pearson
CNGB1	RNH1	0.00626276	0.898905	pearson
ST6GALNAC2	RNH1	0.106291	0.0305953	pearson
CHAT	RNH1	0.0194351	0.693369	pearson
PABPC1	RNH1	-0.21948	6.56e-06	pearson
TESK2	RNH1	-0.173811	0.000380992	pearson
CFAP20	RNH1	-0.0607573	0.217341	pearson
CSNK2A2	RNH1	-0.106712	0.0299386	pearson
EIF2B3	RNH1	0.20458	2.74e-05	pearson
CAMK2A	RNH1	0.134054	0.00630125	pearson
TCOF1	RNH1	-0.0193985	0.693917	pearson
CDC42	RNH1	-0.157752	0.00128077	pearson
OSBPL3	RNH1	0.0348317	0.479696	pearson
EPHA8	RNH1	-0.00496544	0.919767	pearson
SLC12A3	RNH1	-0.00762024	0.877151	pearson
RAD18	RNH1	-0.208248	1.94e-05	pearson
ATP2B1	RNH1	-0.169316	0.00054086	pearson
TRPM5	RNH1	-0.0157543	0.749269	pearson
NCK2	RNH1	-0.0806495	0.101279	pearson
MAP4K4	RNH1	0.217918	7.66e-06	pearson
MGAT4A	RNH1	-0.177255	0.000289595	pearson
RPL31	RNH1	-0.0236503	0.631351	pearson
WDR1	RNH1	0.0973022	0.0478703	pearson
SNX13	RNH1	-0.205409	2.53e-05	pearson
ARHGAP10	RNH1	-0.0857287	0.0814638	pearson
RPS6KA2	RNH1	0.0420066	0.393937	pearson
ING3	RNH1	-0.162461	0.000907722	pearson
VASH1	RNH1	0.175435	0.000334972	pearson
LMCD1	RNH1	0.148401	0.00246868	pearson
BUD23	RNH1	-0.20338	3.06e-05	pearson
SEL1L	RNH1	-0.0540667	0.272392	pearson
TRIP13	RNH1	-0.0099544	0.839968	pearson
ATP6AP1	RNH1	-0.0842815	0.0867606	pearson
TCF3	RNH1	-0.156081	0.00144392	pearson
TRIB2	RNH1	-0.0177171	0.719274	pearson
DAZAP1	RNH1	-0.148352	0.00247683	pearson
MBD3	RNH1	0.128557	0.00882638	pearson
PRLH	RNH1	-0.0821627	0.0950117	pearson
HLTF	RNH1	-0.240991	6.98e-07	pearson
FAM50A	RNH1	0.0399724	0.417261	pearson
FAM3A	RNH1	0.0538854	0.274005	pearson
CPSF1	RNH1	-0.0552854	0.261714	pearson
MYO3B	RNH1	0.00425897	0.931152	pearson
CYBRD1	RNH1	0.218904	6.95e-06	pearson
CDH19	RNH1	-0.0130783	0.790769	pearson
PDCD2	RNH1	-0.0996206	0.0427757	pearson
SLC6A15	RNH1	0.00999962	0.839251	pearson
RDH11	RNH1	-0.0834694	0.0898522	pearson
PRKACA	RNH1	-0.0164945	0.737911	pearson
ADGRL1	RNH1	-0.108053	0.0279238	pearson
SPP2	RNH1	-0.0317515	0.519409	pearson
ACTN1	RNH1	0.406582	6.52e-18	pearson
ZFYVE26	RNH1	0.143675	0.00339253	pearson
RPS6KA6	RNH1	-0.324689	1.28e-11	pearson
EPN2	RNH1	-0.0776882	0.11449	pearson
PTPN18	RNH1	-0.0373539	0.448447	pearson
LIMS2	RNH1	0.145733	0.00295727	pearson
ASIC4	RNH1	-0.0635603	0.196823	pearson
SPEG	RNH1	0.145775	0.00294891	pearson
LNX1	RNH1	-0.291425	1.51e-09	pearson
ALDH3A2	RNH1	0.154139	0.00165748	pearson
TFRC	RNH1	-0.15579	0.00147425	pearson
SREBF1	RNH1	-0.0673433	0.171424	pearson
TRPC5	RNH1	-0.163931	0.000813664	pearson
AFF4	RNH1	-0.223216	4.52e-06	pearson
UBE2D1	RNH1	-0.111392	0.0234089	pearson
MPP5	RNH1	-0.0640489	0.193396	pearson
RHOBTB1	RNH1	-0.0244088	0.620446	pearson
SMC1A	RNH1	0.0150172	0.760633	pearson
HSD17B10	RNH1	0.00186705	0.969788	pearson
MARK2	RNH1	-0.0604932	0.21935	pearson
HMMR	RNH1	-0.0878899	0.0740432	pearson
CHFR	RNH1	-0.168699	0.000567103	pearson
TRHDE	RNH1	-0.233695	1.53e-06	pearson
P4HA2	RNH1	0.301017	4.06e-10	pearson
FCGR2B	RNH1	0.128014	0.00911924	pearson
NFATC3	RNH1	-0.121386	0.0134539	pearson
TRNT1	RNH1	-0.241097	6.9e-07	pearson
ACADVL	RNH1	-0.126542	0.00995645	pearson
STK10	RNH1	0.307861	1.54e-10	pearson
FBXW11	RNH1	-0.014	0.776403	pearson
ACAP1	RNH1	0.134837	0.00599973	pearson
CRMP1	RNH1	-0.0405944	0.410044	pearson
EVC	RNH1	0.191895	8.52e-05	pearson
DERL2	RNH1	-0.0268661	0.585692	pearson
SIDT1	RNH1	-0.152021	0.00192312	pearson
NDE1	RNH1	0.0860063	0.0804781	pearson
MRVI1	RNH1	0.0798149	0.104874	pearson
TMEM38A	RNH1	-0.00429129	0.930631	pearson
AP1M1	RNH1	0.259975	8.04e-08	pearson
PVR	RNH1	0.21736	8.09e-06	pearson
XRCC1	RNH1	-0.100671	0.0406218	pearson
SCARB1	RNH1	0.0807797	0.100727	pearson
CYP2W1	RNH1	-0.0881922	0.0730507	pearson
MCM2	RNH1	-0.00884087	0.857667	pearson
MOV10L1	RNH1	0.0425594	0.387737	pearson
PANX2	RNH1	-0.0302136	0.539851	pearson
SELENOO	RNH1	-0.0712672	0.147749	pearson
TP63	RNH1	0.0707691	0.150608	pearson
ALPK1	RNH1	-0.0529347	0.282572	pearson
LLGL2	RNH1	-0.222075	5.07e-06	pearson
PDE8A	RNH1	-0.254723	1.49e-07	pearson
CLCN4	RNH1	-0.123617	0.0118259	pearson
NLE1	RNH1	-0.0197675	0.688396	pearson
SDHA	RNH1	0.105463	0.0319255	pearson
SMARCE1	RNH1	-0.351518	1.74e-13	pearson
FNDC8	RNH1	-0.156305	0.00142101	pearson
GSDMB	RNH1	-0.249903	2.59e-07	pearson
KDM5A	RNH1	-0.123119	0.0121737	pearson
ADAM11	RNH1	-0.173157	0.000401125	pearson
PPP2R3A	RNH1	0.0549319	0.264781	pearson
FERMT2	RNH1	0.180708	0.000218827	pearson
ABCB11	RNH1	0.0119313	0.808749	pearson
DHRS9	RNH1	0.0615347	0.211502	pearson
CD5L	RNH1	0.0274275	0.577879	pearson
PTGS2	RNH1	-0.0536193	0.276385	pearson
IGF2BP2	RNH1	0.279858	6.9e-09	pearson
MAP3K13	RNH1	-0.142831	0.00358743	pearson
ST6GAL1	RNH1	0.0547303	0.266542	pearson
TBX21	RNH1	0.148562	0.00244165	pearson
FRY	RNH1	-0.182516	0.000188588	pearson
PICALM	RNH1	0.0606877	0.217869	pearson
NSF	RNH1	-0.128448	0.00888448	pearson
GLI2	RNH1	0.188706	0.000112115	pearson
CLASP1	RNH1	-0.11044	0.024627	pearson
MRPS34	RNH1	-0.0558796	0.256614	pearson
NOTCH3	RNH1	0.0150399	0.760283	pearson
CLNS1A	RNH1	-0.0583868	0.235853	pearson
PPP2R2C	RNH1	0.102682	0.0367542	pearson
TEAD2	RNH1	-0.0474644	0.335357	pearson
EED	RNH1	-0.0353161	0.473604	pearson
CDHR2	RNH1	-0.0561796	0.254066	pearson
SNCB	RNH1	0.118181	0.016137	pearson
TSG101	RNH1	0.384066	5.32e-16	pearson
NCBP3	RNH1	-0.193439	7.45e-05	pearson
ATP2A3	RNH1	0.0204918	0.677607	pearson
CA12	RNH1	0.105319	0.032161	pearson
MGLL	RNH1	0.115379	0.0188562	pearson
NTN4	RNH1	-0.0149154	0.762207	pearson
BCS1L	RNH1	-0.000876314	0.985817	pearson
NUAK1	RNH1	0.156613	0.00138999	pearson
DPP8	RNH1	-0.241084	6.91e-07	pearson
SLC24A1	RNH1	-0.121572	0.0133114	pearson
ZNF532	RNH1	0.144499	0.00321168	pearson
SCARF1	RNH1	0.111314	0.0235063	pearson
LMAN1	RNH1	-0.0648647	0.187772	pearson
HACD3	RNH1	-0.0391638	0.426752	pearson
IPCEF1	RNH1	0.0551472	0.26291	pearson
ZZEF1	RNH1	-0.0825193	0.0935809	pearson
NOX3	RNH1	0.0585188	0.234794	pearson
ENO1	RNH1	0.314934	5.52e-11	pearson
SLC12A1	RNH1	-0.0721152	0.142976	pearson
MYDGF	RNH1	0.107884	0.0281715	pearson
ANO8	RNH1	-0.176874	0.000298574	pearson
TUBE1	RNH1	-0.175162	0.000342319	pearson
ARHGEF10L	RNH1	-0.201963	3.48e-05	pearson
TXK	RNH1	-0.210153	1.62e-05	pearson
WSCD2	RNH1	-0.149161	0.00234354	pearson
KCNQ2	RNH1	-0.00896767	0.855648	pearson
TACR2	RNH1	0.0614557	0.212091	pearson
ACTR6	RNH1	-0.180979	0.000214028	pearson
TIPIN	RNH1	-0.0322659	0.512662	pearson
SRI	RNH1	-0.104599	0.0333644	pearson
EIF4G3	RNH1	-0.122367	0.0127151	pearson
NUP37	RNH1	0.0383792	0.436082	pearson
SEMA3A	RNH1	0.165149	0.000742673	pearson
GTSE1	RNH1	-0.113824	0.0205308	pearson
SEMA3C	RNH1	-0.145794	0.00294517	pearson
TTC38	RNH1	0.0787931	0.109411	pearson
ACAT1	RNH1	0.194811	6.6e-05	pearson
GRAMD4	RNH1	0.113635	0.0207427	pearson
CELSR1	RNH1	0.172003	0.00043909	pearson
WNT8B	RNH1	-0.0600837	0.222492	pearson
ZNF638	RNH1	-0.341556	9.03e-13	pearson
SLC25A40	RNH1	-0.139355	0.00450055	pearson
TIMM21	RNH1	-0.00206653	0.966562	pearson
ADD2	RNH1	0.0232398	0.637287	pearson
FGF4	RNH1	0.00554759	0.910398	pearson
RASAL2	RNH1	-0.0921775	0.0609504	pearson
VPS9D1	RNH1	0.0732199	0.136937	pearson
ZNF37A	RNH1	-0.252166	2e-07	pearson
MARK3	RNH1	-0.0878929	0.0740335	pearson
SLC25A3	RNH1	0.143034	0.0035396	pearson
FNDC3B	RNH1	-0.108831	0.0268098	pearson
FOSL2	RNH1	-0.196524	5.68e-05	pearson
CACNG5	RNH1	-0.0196479	0.690183	pearson
CACNG4	RNH1	-0.0642782	0.191803	pearson
FRYL	RNH1	-0.181958	0.000197481	pearson
TMEM131	RNH1	-0.00629506	0.898387	pearson
FSCN1	RNH1	0.296057	8.05e-10	pearson
ACTB	RNH1	0.337206	1.82e-12	pearson
MOCOS	RNH1	0.0783664	0.111351	pearson
PLD1	RNH1	0.0874767	0.0754176	pearson
ATP12A	RNH1	-0.00372539	0.93976	pearson
WDR62	RNH1	0.08259	0.0932991	pearson
DLG1	RNH1	-0.238791	8.87e-07	pearson
RAB7A	RNH1	-0.0281285	0.568194	pearson
BCAP29	RNH1	0.147749	0.00258064	pearson
SEC31B	RNH1	-0.100739	0.0404859	pearson
SART3	RNH1	-0.123826	0.0116829	pearson
ARHGAP15	RNH1	0.0782067	0.112084	pearson
TUBA3D	RNH1	-0.108681	0.0270218	pearson
PAX2	RNH1	-0.0389926	0.428778	pearson
EXOSC7	RNH1	-0.0595915	0.226311	pearson
KIFAP3	RNH1	-0.0296791	0.547049	pearson
MKRN2	RNH1	-0.185545	0.000146519	pearson
MCM6	RNH1	0.0736214	0.134791	pearson
REXO2	RNH1	0.200673	3.91e-05	pearson
RBM7	RNH1	0.17344	0.000392305	pearson
RBMS2	RNH1	0.167811	0.000606996	pearson
BAZ2A	RNH1	-0.123026	0.0122395	pearson
PTPN23	RNH1	-0.0386096	0.433329	pearson
MLH1	RNH1	0.00994562	0.840107	pearson
UNG	RNH1	-0.15881	0.00118642	pearson
FMO4	RNH1	-0.0971746	0.0481648	pearson
KLHL20	RNH1	-0.112594	0.0219453	pearson
RGS11	RNH1	-0.0457279	0.353357	pearson
SLC46A1	RNH1	-0.208527	1.89e-05	pearson
PLXNA2	RNH1	0.0112766	0.819057	pearson
SPAG5	RNH1	-0.182102	0.000195151	pearson
ANKRD13A	RNH1	-0.0900726	0.0671172	pearson
TPD52	RNH1	-0.197496	5.21e-05	pearson
ACACB	RNH1	0.0796203	0.105726	pearson
TRAF4	RNH1	-0.294928	9.39e-10	pearson
PAG1	RNH1	-0.198336	4.83e-05	pearson
GPATCH1	RNH1	-0.219094	6.82e-06	pearson
ICAM3	RNH1	0.12313	0.0121661	pearson
NT5C2	RNH1	-0.203788	2.94e-05	pearson
GPC4	RNH1	0.0475378	0.334609	pearson
MBNL3	RNH1	-0.247079	3.56e-07	pearson
CAMSAP3	RNH1	-0.279904	6.86e-09	pearson
RAP1GAP	RNH1	-0.137896	0.00494301	pearson
XAB2	RNH1	-0.0415575	0.399018	pearson
ARHGEF1	RNH1	0.233697	1.53e-06	pearson
STXBP2	RNH1	-0.170507	0.000493306	pearson
MAP2K7	RNH1	-0.139449	0.00447356	pearson
NMRK2	RNH1	-0.0557138	0.25803	pearson
DGKD	RNH1	0.0376055	0.445395	pearson
CTTNBP2	RNH1	-0.142267	0.00372313	pearson
ACTL6B	RNH1	-0.0720428	0.143379	pearson
RARB	RNH1	0.0694147	0.158596	pearson
TOP2B	RNH1	-0.297812	6.33e-10	pearson
TM9SF3	RNH1	-0.151984	0.00192804	pearson
NFKB2	RNH1	0.165411	0.000728186	pearson
UBE2T	RNH1	-0.0627424	0.202658	pearson
PPP1R12B	RNH1	0.026206	0.594939	pearson
DNAJC10	RNH1	-0.0879953	0.0736959	pearson
GTF3C1	RNH1	-0.083097	0.0912994	pearson
IL4R	RNH1	0.231529	1.92e-06	pearson
USP33	RNH1	-0.214505	1.07e-05	pearson
PAK3	RNH1	-0.0552892	0.261681	pearson
CAPN6	RNH1	-0.0186131	0.705721	pearson
DCX	RNH1	-0.0696046	0.157456	pearson
SNRPA	RNH1	-0.165056	0.000747888	pearson
SPAG6	RNH1	-0.0807	0.101065	pearson
EXOSC5	RNH1	-0.145417	0.00302055	pearson
DYNC1I2	RNH1	0.0223069	0.650864	pearson
APBB1IP	RNH1	-0.0934442	0.0574701	pearson
LRCH4	RNH1	-0.171247	0.000465759	pearson
FAM76B	RNH1	-0.283923	4.08e-09	pearson
SIRT6	RNH1	-0.0637882	0.195219	pearson
TYR	RNH1	-0.010764	0.827149	pearson
POLD3	RNH1	-0.0329901	0.503239	pearson
ACTN2	RNH1	0.0206858	0.674729	pearson
CAPZB	RNH1	0.143533	0.00342457	pearson
GPR137B	RNH1	0.0267052	0.587939	pearson
NAALAD2	RNH1	-0.0673182	0.171584	pearson
JADE1	RNH1	-0.136157	0.00552127	pearson
SLC25A43	RNH1	0.0408599	0.406987	pearson
UBE2A	RNH1	0.0418871	0.395285	pearson
FGFR1	RNH1	0.0459616	0.3509	pearson
FKBP6	RNH1	0.00256995	0.958423	pearson
SMC1B	RNH1	-0.0513706	0.297057	pearson
FBLN1	RNH1	-0.228571	2.61e-06	pearson
ITGA8	RNH1	-0.0576675	0.241685	pearson
CST7	RNH1	0.250723	2.36e-07	pearson
MAP2	RNH1	0.0747003	0.129153	pearson
PIAS2	RNH1	-0.188023	0.000118832	pearson
AMPH	RNH1	0.0295118	0.549313	pearson
ARAF	RNH1	0.172166	0.000433525	pearson
MCCC1	RNH1	-0.169207	0.000545407	pearson
LAMP3	RNH1	0.142661	0.00362769	pearson
FAP	RNH1	0.268992	2.71e-08	pearson
NEBL	RNH1	-0.110378	0.0247078	pearson
ACER3	RNH1	0.0417179	0.397198	pearson
UBE2K	RNH1	-0.261796	6.47e-08	pearson
PIK3C3	RNH1	-0.0429994	0.382845	pearson
N4BP2	RNH1	-0.202132	3.43e-05	pearson
TIGAR	RNH1	0.0983673	0.04547	pearson
TULP3	RNH1	-0.0817253	0.0967907	pearson
SYNJ2	RNH1	0.0488929	0.320998	pearson
ADCY2	RNH1	-0.0346145	0.482441	pearson
PPP2R5C	RNH1	0.0527366	0.28438	pearson
RBFOX1	RNH1	0.0183283	0.71002	pearson
GNB1	RNH1	0.00907692	0.853909	pearson
HOXA9	RNH1	-0.0709777	0.149405	pearson
EDN1	RNH1	0.102951	0.0362621	pearson
MLLT10	RNH1	-0.211156	1.48e-05	pearson
ZCWPW1	RNH1	-0.112723	0.0217932	pearson
ADCYAP1R1	RNH1	0.11046	0.0246013	pearson
FGF20	RNH1	-0.034189	0.487843	pearson
P2RY10	RNH1	0.0631044	0.200061	pearson
ITM2A	RNH1	-0.0230837	0.639551	pearson
NRDC	RNH1	0.0119838	0.807924	pearson
VDAC3	RNH1	-0.0307349	0.532878	pearson
PCM1	RNH1	-0.132212	0.00706394	pearson
TNRC6C	RNH1	-0.14632	0.00284271	pearson
CBFA2T2	RNH1	-0.157734	0.00128242	pearson
BRINP1	RNH1	0.059983	0.22327	pearson
ITCH	RNH1	-0.0286784	0.560652	pearson
PKD2L2	RNH1	-0.199482	4.36e-05	pearson
TP53INP2	RNH1	0.0330969	0.501858	pearson
SDF4	RNH1	0.148943	0.00237877	pearson
MYH7B	RNH1	-0.0227428	0.644506	pearson
BPIFB2	RNH1	-0.120883	0.013847	pearson
TP73	RNH1	0.0359908	0.46519	pearson
TOLLIP	RNH1	0.301356	3.87e-10	pearson
UBE2D4	RNH1	-0.141133	0.00401017	pearson
CLUL1	RNH1	-0.041341	0.401481	pearson
RUNX1T1	RNH1	0.0102912	0.834629	pearson
CDH17	RNH1	-0.0548116	0.265831	pearson
THOC1	RNH1	-0.219419	6.6e-06	pearson
FKBP7	RNH1	0.050531	0.305033	pearson
OSBPL6	RNH1	0.140849	0.00408503	pearson
SLC1A3	RNH1	0.0336914	0.494203	pearson
XRCC5	RNH1	-0.00524092	0.915332	pearson
LXN	RNH1	0.0521012	0.290231	pearson
SP140	RNH1	0.0595876	0.226341	pearson
MKNK1	RNH1	0.0359268	0.465985	pearson
TNS1	RNH1	0.0954662	0.0522568	pearson
REXO1	RNH1	-0.100239	0.0414968	pearson
SAR1A	RNH1	0.1318	0.0072452	pearson
CDC14A	RNH1	-0.120105	0.0144752	pearson
RAPGEF3	RNH1	0.122418	0.012678	pearson
CEACAM1	RNH1	-0.0638305	0.194922	pearson
SENP1	RNH1	-0.120369	0.0142594	pearson
DUSP13	RNH1	-0.0500816	0.30936	pearson
CIC	RNH1	0.131597	0.00733654	pearson
LIPE	RNH1	-0.14782	0.00256822	pearson
FDFT1	RNH1	-0.181843	0.00019936	pearson
PAFAH1B3	RNH1	-0.239019	8.65e-07	pearson
OPHN1	RNH1	-0.152299	0.00188615	pearson
AFM	RNH1	-0.0703026	0.153324	pearson
KIF22	RNH1	-0.178922	0.000253126	pearson
SCGN	RNH1	-0.0813254	0.0984403	pearson
CARMIL1	RNH1	-0.0242195	0.623161	pearson
PGM1	RNH1	0.286603	2.87e-09	pearson
DDX1	RNH1	-0.0623258	0.205678	pearson
DNM2	RNH1	-0.146124	0.00288062	pearson
EPB41L2	RNH1	0.179511	0.0002413	pearson
RIMS1	RNH1	-0.0172295	0.726687	pearson
MOXD1	RNH1	-0.00960503	0.845513	pearson
STX7	RNH1	-0.111773	0.0229364	pearson
RABL2B	RNH1	-0.123848	0.0116679	pearson
KEAP1	RNH1	0.0440217	0.371624	pearson
DDX43	RNH1	-0.0712955	0.147587	pearson
PTPRH	RNH1	0.064256	0.191957	pearson
DCT	RNH1	-0.00363798	0.941171	pearson
SLC35C2	RNH1	-0.039612	0.421476	pearson
CRYBG3	RNH1	-0.193463	7.43e-05	pearson
EPHA6	RNH1	-0.0359225	0.466039	pearson
SCTR	RNH1	-0.0844528	0.0861196	pearson
RFX3	RNH1	-0.214601	1.06e-05	pearson
RIF1	RNH1	-0.189995	0.0001004	pearson
RAB21	RNH1	-0.124226	0.0114132	pearson
SLC4A4	RNH1	-0.148432	0.00246333	pearson
SMARCA2	RNH1	-0.114666	0.0196087	pearson
RDH8	RNH1	0.0234376	0.634426	pearson
SESN1	RNH1	-0.0880697	0.0734516	pearson
MID2	RNH1	0.00148232	0.976012	pearson
PIH1D3	RNH1	-0.135415	0.00578566	pearson
COL5A3	RNH1	0.293725	1.11e-09	pearson
SRCAP	RNH1	-0.0900716	0.0671204	pearson
PUM3	RNH1	0.142437	0.00368155	pearson
CPB2	RNH1	-0.12288	0.0123434	pearson
CHRNA3	RNH1	-0.123983	0.0115765	pearson
KCNN2	RNH1	-0.10158	0.038833	pearson
CNOT4	RNH1	-0.193872	7.17e-05	pearson
PSEN1	RNH1	0.0336752	0.49441	pearson
CPOX	RNH1	0.00580441	0.906269	pearson
CLDND1	RNH1	-0.101666	0.0386676	pearson
MOK	RNH1	0.109161	0.02635	pearson
HSP90AA1	RNH1	-0.0443102	0.368496	pearson
RBL1	RNH1	-0.03716	0.450808	pearson
DLGAP4	RNH1	-0.0409688	0.405736	pearson
IGSF9B	RNH1	0.0363437	0.460822	pearson
CFHR2	RNH1	0.0287796	0.559268	pearson
NDC80	RNH1	-0.0360335	0.46466	pearson
AP4E1	RNH1	-0.0071489	0.884695	pearson
RSBN1	RNH1	-0.253621	1.69e-07	pearson
MAGI3	RNH1	-0.0903363	0.0663177	pearson
CXCL2	RNH1	0.0928239	0.0591533	pearson
AFP	RNH1	-0.0477763	0.332187	pearson
COL4A4	RNH1	-0.0294858	0.549665	pearson
TCF7	RNH1	0.0190212	0.699579	pearson
OSTM1	RNH1	0.251819	2.08e-07	pearson
CDH7	RNH1	-0.0758698	0.123249	pearson
IMPG2	RNH1	-0.112927	0.0215545	pearson
PCNP	RNH1	-0.176898	0.000298011	pearson
EXD2	RNH1	-0.0619838	0.208182	pearson
ARG2	RNH1	-0.0299134	0.543888	pearson
MEF2C	RNH1	0.0307463	0.532725	pearson
PTPRC	RNH1	0.113326	0.0210937	pearson
CACNA1S	RNH1	-0.0340214	0.48998	pearson
PKP1	RNH1	0.219469	6.57e-06	pearson
UBA5	RNH1	-0.219585	6.5e-06	pearson
STK17B	RNH1	0.0963978	0.049991	pearson
CDC14B	RNH1	-0.0432379	0.380209	pearson
ZNF510	RNH1	-0.165431	0.000727086	pearson
LRP2	RNH1	-0.0662982	0.178183	pearson
ZNF506	RNH1	-0.367454	1.11e-14	pearson
JMJD4	RNH1	0.0245488	0.618442	pearson
DUSP12	RNH1	-0.137018	0.00522765	pearson
AACS	RNH1	0.00479004	0.922592	pearson
DELE1	RNH1	-0.0778308	0.113825	pearson
SLC13A1	RNH1	-0.0847856	0.0848851	pearson
CADPS2	RNH1	-0.105217	0.032329	pearson
PCDHB4	RNH1	-0.0875516	0.0751672	pearson
PCDHA6	RNH1	-0.0126353	0.797701	pearson
PCDHGA2	RNH1	-0.092401	0.0603241	pearson
HSPB11	RNH1	0.0846875	0.0852475	pearson
PHLPP1	RNH1	-0.258387	9.7e-08	pearson
ATP8B1	RNH1	-0.222929	4.65e-06	pearson
IL12RB2	RNH1	0.21054	1.56e-05	pearson
SMARCD3	RNH1	0.0473085	0.336948	pearson
WDR70	RNH1	0.0389336	0.429478	pearson
FYB1	RNH1	0.120323	0.0142968	pearson
MPP4	RNH1	0.114838	0.0194246	pearson
STRADB	RNH1	-0.108576	0.0271715	pearson
BZW1	RNH1	0.123593	0.0118426	pearson
PGR	RNH1	0.0776837	0.114511	pearson
C1QTNF3	RNH1	0.04021	0.414495	pearson
ME2	RNH1	-0.00813802	0.868876	pearson
C5orf22	RNH1	-0.0491489	0.318468	pearson
CCNT2	RNH1	-0.302041	3.51e-10	pearson
FAM135A	RNH1	-0.117855	0.016435	pearson
COL19A1	RNH1	-0.0447227	0.364049	pearson
EPB41L3	RNH1	-0.000460043	0.992554	pearson
COBLL1	RNH1	-0.0962494	0.0503462	pearson
DLG3	RNH1	-0.265051	4.38e-08	pearson
KCNK2	RNH1	-0.0237547	0.629846	pearson
SERTAD4	RNH1	0.0188987	0.701421	pearson
TRAF5	RNH1	-0.0636364	0.196286	pearson
MRPL22	RNH1	0.0208718	0.671975	pearson
GEMIN5	RNH1	0.0265944	0.589491	pearson
NFE2L1	RNH1	0.198827	4.62e-05	pearson
SEMA5B	RNH1	-0.00016553	0.997321	pearson
GSK3B	RNH1	-0.191285	8.98e-05	pearson
ITGB5	RNH1	0.252006	2.03e-07	pearson
ERC1	RNH1	0.125268	0.0107361	pearson
XPO1	RNH1	-0.163319	0.000851701	pearson
RNF13	RNH1	-0.0953291	0.0525974	pearson
TRPM3	RNH1	-0.079791	0.104978	pearson
PALB2	RNH1	-0.0959741	0.051011	pearson
DOP1A	RNH1	-0.243359	5.38e-07	pearson
LYRM2	RNH1	-0.0463084	0.347273	pearson
BCKDHB	RNH1	-0.325697	1.1e-11	pearson
KAT6A	RNH1	-0.194762	6.63e-05	pearson
TUT7	RNH1	-0.12368	0.0117827	pearson
ULK2	RNH1	-0.0523061	0.288335	pearson
GRHL2	RNH1	-0.233181	1.61e-06	pearson
TNPO1	RNH1	-0.023565	0.632584	pearson
PLOD1	RNH1	0.291484	1.5e-09	pearson
P2RX5	RNH1	-0.0197783	0.688236	pearson
ITGAE	RNH1	-0.0173237	0.725254	pearson
DIS3	RNH1	-0.083564	0.0894875	pearson
PIBF1	RNH1	-0.16817	0.000590582	pearson
TDRD3	RNH1	-0.166736	0.000658736	pearson
NUFIP1	RNH1	-0.127702	0.00929115	pearson
PDS5B	RNH1	-0.0315266	0.522373	pearson
OXCT1	RNH1	0.158958	0.00117372	pearson
RRAGB	RNH1	-0.174497	0.000360867	pearson
EPYC	RNH1	0.0689652	0.161316	pearson
CYLD	RNH1	0.184799	0.000155981	pearson
SLC27A5	RNH1	-0.192165	8.32e-05	pearson
ZNF324	RNH1	-0.0831078	0.091257	pearson
ZNF671	RNH1	0.0847699	0.0849428	pearson
ZNF416	RNH1	-0.0785091	0.1107	pearson
ZNF586	RNH1	-0.328814	6.8e-12	pearson
ZNF446	RNH1	-0.203211	3.1e-05	pearson
ZNF264	RNH1	-0.270519	2.24e-08	pearson
RPS5	RNH1	0.059238	0.229082	pearson
FAT1	RNH1	-0.00514273	0.916913	pearson
YTHDC1	RNH1	-0.286193	3.03e-09	pearson
CHMP2B	RNH1	-0.0924551	0.060173	pearson
SMAP2	RNH1	-0.015316	0.756021	pearson
PPIE	RNH1	-0.128504	0.00885419	pearson
ZMPSTE24	RNH1	-0.150944	0.00207262	pearson
STARD7	RNH1	0.0242264	0.623061	pearson
NOA1	RNH1	-0.125518	0.0105791	pearson
REST	RNH1	-0.184818	0.000155733	pearson
HAL	RNH1	-0.0955399	0.0520745	pearson
SSH1	RNH1	0.148883	0.0023887	pearson
GSTP1	RNH1	0.199597	4.31e-05	pearson
APLP2	RNH1	-0.053833	0.274473	pearson
FAM234B	RNH1	-0.275898	1.14e-08	pearson
SLCO1A2	RNH1	-0.10793	0.0281048	pearson
WBP11	RNH1	-0.0600203	0.222982	pearson
EIF3I	RNH1	-0.0327118	0.506849	pearson
NKAIN1	RNH1	-0.0998415	0.0423151	pearson
COL16A1	RNH1	0.296256	7.83e-10	pearson
TXLNA	RNH1	0.125382	0.0106642	pearson
APOB	RNH1	-0.0691251	0.160344	pearson
NCOA1	RNH1	-0.279993	6.79e-09	pearson
AGBL5	RNH1	-0.163476	0.000841813	pearson
EFR3B	RNH1	-0.0621759	0.206773	pearson
KIF3C	RNH1	-0.0967508	0.049154	pearson
RAB10	RNH1	-0.101358	0.0392641	pearson
GCKR	RNH1	-0.131421	0.00741594	pearson
HADHA	RNH1	-0.0190883	0.698572	pearson
MAPRE3	RNH1	-0.075419	0.125499	pearson
CAD	RNH1	0.108389	0.0274392	pearson
CD59	RNH1	0.221313	5.47e-06	pearson
CD82	RNH1	0.431788	3.12e-20	pearson
BCORL1	RNH1	0.0201908	0.682083	pearson
ATRX	RNH1	-0.229289	2.43e-06	pearson
AK6	RNH1	-0.00827096	0.866754	pearson
FCN1	RNH1	0.209071	1.8e-05	pearson
MYNN	RNH1	-0.244388	4.8e-07	pearson
MECOM	RNH1	-0.195785	6.06e-05	pearson
SCAMP1	RNH1	-0.180079	0.000230386	pearson
PREP	RNH1	-0.00412325	0.933341	pearson
HACE1	RNH1	-0.17048	0.000494335	pearson
SEH1L	RNH1	-0.0425654	0.387669	pearson
WDR47	RNH1	0.0373712	0.448237	pearson
WDFY1	RNH1	-0.0513188	0.297545	pearson
OVGP1	RNH1	-0.285898	3.15e-09	pearson
SLC25A24	RNH1	-0.0559529	0.255989	pearson
MAP3K4	RNH1	0.0828426	0.0922986	pearson
PILRA	RNH1	0.286105	3.06e-09	pearson
IGSF9	RNH1	-0.295898	8.23e-10	pearson
ABCB1	RNH1	-0.0302102	0.539897	pearson
ZNF213	RNH1	-0.15214	0.00190721	pearson
AKR1B1	RNH1	-0.0179201	0.716196	pearson
CPNE3	RNH1	-0.195659	6.13e-05	pearson
RRN3	RNH1	-0.199954	4.17e-05	pearson
CTTN	RNH1	-0.00321263	0.948039	pearson
WNT11	RNH1	0.0704905	0.152226	pearson
MTIF2	RNH1	-0.186973	0.000129911	pearson
DDHD2	RNH1	-0.10539	0.0320436	pearson
TTC39A	RNH1	-0.275263	1.24e-08	pearson
EPS15	RNH1	-0.178004	0.000272636	pearson
ORC1	RNH1	0.103196	0.035818	pearson
MGST2	RNH1	-0.171805	0.000445939	pearson
CHERP	RNH1	-0.153426	0.00174281	pearson
ATG16L1	RNH1	0.099197	0.0436708	pearson
USP40	RNH1	0.0313459	0.524761	pearson
POMGNT1	RNH1	0.037568	0.445849	pearson
RAD54L	RNH1	-0.0900453	0.0672005	pearson
MAST2	RNH1	-0.046605	0.344191	pearson
DNAJA1	RNH1	0.190921	9.27e-05	pearson
B4GALT1	RNH1	-0.0136619	0.781665	pearson
CHMP5	RNH1	0.0138052	0.779433	pearson
NFX1	RNH1	-0.0183595	0.709549	pearson
AQP6	RNH1	0.0303548	0.537959	pearson
DIMT1	RNH1	-0.00660641	0.89339	pearson
IPO11	RNH1	0.00462334	0.925278	pearson
FOLH1	RNH1	0.00897299	0.855563	pearson
EIF2AK1	RNH1	-0.223843	4.24e-06	pearson
NME8	RNH1	0.0899768	0.0674095	pearson
EPDR1	RNH1	0.198339	4.83e-05	pearson
SNX10	RNH1	0.0812881	0.0985952	pearson
SEPHS1	RNH1	-0.129106	0.00853881	pearson
MRPL28	RNH1	0.209803	1.68e-05	pearson
HBQ1	RNH1	-0.0471323	0.338753	pearson
ITPKC	RNH1	0.0986247	0.0449052	pearson
CEACAM6	RNH1	-0.021717	0.659509	pearson
FAT2	RNH1	0.168737	0.000565479	pearson
RBM22	RNH1	0.0976429	0.0470913	pearson
TMED2	RNH1	-0.206474	2.29e-05	pearson
ERO1B	RNH1	-0.0901137	0.0669922	pearson
ZFAND6	RNH1	-0.180778	0.000217577	pearson
HSD17B2	RNH1	-0.107779	0.0283257	pearson
TXLNG	RNH1	-0.166954	0.000647939	pearson
PPEF1	RNH1	0.080844	0.100456	pearson
LAT2	RNH1	0.1507	0.00210786	pearson
HUWE1	RNH1	-0.123544	0.0118763	pearson
ZW10	RNH1	0.123404	0.0119739	pearson
ALG9	RNH1	-0.0768322	0.118551	pearson
MYBPC2	RNH1	-0.00777491	0.874677	pearson
NOX4	RNH1	0.117579	0.0166908	pearson
ACOX3	RNH1	-0.166969	0.000647191	pearson
MTMR2	RNH1	0.0200423	0.684296	pearson
PPP1R15A	RNH1	-0.100786	0.0403925	pearson
HSD17B14	RNH1	-0.114838	0.0194243	pearson
TRIP6	RNH1	0.256909	1.15e-07	pearson
ACHE	RNH1	-0.031463	0.523213	pearson
FTL	RNH1	0.228156	2.73e-06	pearson
SRRT	RNH1	-0.185263	0.000150031	pearson
BAX	RNH1	0.130461	0.00786444	pearson
NLK	RNH1	-0.327468	8.37e-12	pearson
PIGS	RNH1	0.0812899	0.0985879	pearson
ADAMTS2	RNH1	0.239664	8.07e-07	pearson
TMPRSS11E	RNH1	0.0656804	0.18227	pearson
ATXN7L3	RNH1	-0.156814	0.00137015	pearson
PGS1	RNH1	-0.192956	7.77e-05	pearson
PSMC5	RNH1	0.11774	0.0165409	pearson
UIMC1	RNH1	-0.033555	0.495953	pearson
CETP	RNH1	0.0973118	0.0478482	pearson
MMP2	RNH1	0.186978	0.000129857	pearson
MT3	RNH1	-0.044317	0.368422	pearson
LPCAT2	RNH1	0.0857954	0.0812259	pearson
GNAO1	RNH1	0.0489332	0.320599	pearson
OGFOD1	RNH1	0.101285	0.0394072	pearson
SH3BP2	RNH1	-0.0502448	0.307784	pearson
NOP14	RNH1	-0.0124797	0.80014	pearson
ADD1	RNH1	-0.0279717	0.570354	pearson
L2HGDH	RNH1	-0.154118	0.00165992	pearson
TXNDC16	RNH1	-0.160115	0.0010788	pearson
RTRAF	RNH1	-0.0184748	0.707808	pearson
NID2	RNH1	0.146839	0.00274482	pearson
GMCL1	RNH1	-0.36451	1.87e-14	pearson
SF3B2	RNH1	0.0840178	0.0877551	pearson
KLHL42	RNH1	-0.0499829	0.310315	pearson
GNAS	RNH1	-0.161575	0.000969128	pearson
DNM1L	RNH1	-0.23722	1.05e-06	pearson
PTHLH	RNH1	0.226644	3.19e-06	pearson
PHACTR3	RNH1	0.0254544	0.605549	pearson
ERGIC2	RNH1	-0.102893	0.0363681	pearson
TFAP2C	RNH1	-0.0333363	0.498767	pearson
AURKA	RNH1	0.0532648	0.279578	pearson
CASS4	RNH1	0.180571	0.000221307	pearson
PIR	RNH1	-0.117052	0.0171882	pearson
AAMDC	RNH1	-0.0398744	0.418405	pearson
RFX2	RNH1	-0.0535602	0.276915	pearson
METTL2A	RNH1	-0.1206	0.0140727	pearson
SULT2B1	RNH1	0.156336	0.00141788	pearson
ALG6	RNH1	-0.182403	0.00019035	pearson
CNOT3	RNH1	-0.177479	0.000284419	pearson
GP6	RNH1	-0.00382532	0.938147	pearson
PTPN4	RNH1	-0.212852	1.25e-05	pearson
DDX18	RNH1	-0.0188932	0.701503	pearson
KHSRP	RNH1	-0.1145	0.0197874	pearson
GNA11	RNH1	0.180774	0.000217654	pearson
ASAP3	RNH1	-0.090803	0.0649219	pearson
EDEM2	RNH1	0.0718969	0.144193	pearson
DNMT3B	RNH1	-0.192703	7.94e-05	pearson
REM1	RNH1	0.0617484	0.209918	pearson
TPX2	RNH1	0.0341965	0.487748	pearson
PDRG1	RNH1	-0.0573682	0.24414	pearson
EPB41L1	RNH1	-0.230635	2.11e-06	pearson
SLC15A1	RNH1	-0.153966	0.00167786	pearson
DOCK9	RNH1	-0.0928003	0.0592182	pearson
ANKRD10	RNH1	-0.255789	1.31e-07	pearson
TGDS	RNH1	-0.0797733	0.105056	pearson
DOCK3	RNH1	-0.256893	1.16e-07	pearson
C3orf18	RNH1	0.10842	0.0273938	pearson
COQ9	RNH1	-0.0377438	0.443722	pearson
TMEM40	RNH1	-0.137182	0.00517328	pearson
KIF9	RNH1	-0.167836	0.000605857	pearson
ARHGAP28	RNH1	-0.0468175	0.341992	pearson
CRLS1	RNH1	-0.276868	1.01e-08	pearson
DEFB127	RNH1	-0.0248683	0.61388	pearson
PPP1R13B	RNH1	-0.0895323	0.0687802	pearson
ATRN	RNH1	-0.012617	0.797988	pearson
SMOX	RNH1	0.185251	0.000150183	pearson
SIGLEC1	RNH1	0.298866	5.47e-10	pearson
FKBP1A	RNH1	0.227063	3.05e-06	pearson
NSFL1C	RNH1	0.0489671	0.320263	pearson
SLC4A11	RNH1	-0.0852091	0.0833346	pearson
C20orf194	RNH1	-0.067478	0.170567	pearson
ZNF343	RNH1	-0.0976191	0.0471453	pearson
EBF4	RNH1	0.0630811	0.200227	pearson
CPXM1	RNH1	0.255816	1.31e-07	pearson
MAVS	RNH1	-0.0979422	0.0464157	pearson
LZTS3	RNH1	-0.0668575	0.174541	pearson
F11	RNH1	-0.0821108	0.0952215	pearson
XRN2	RNH1	0.0455329	0.355415	pearson
KIZ	RNH1	-0.01177	0.811285	pearson
DYNLL1	RNH1	0.193651	7.31e-05	pearson
TESC	RNH1	-0.156603	0.00139099	pearson
SNX5	RNH1	-0.0988922	0.0443247	pearson
RPL6	RNH1	-0.107708	0.0284305	pearson
SIRPG	RNH1	0.117092	0.0171504	pearson
MAPKAPK5	RNH1	-0.147769	0.00257727	pearson
P2RX7	RNH1	0.178501	0.000261906	pearson
ESF1	RNH1	-0.119182	0.0152528	pearson
RBBP9	RNH1	-0.114191	0.0201244	pearson
ANAPC5	RNH1	-0.207376	2.11e-05	pearson
SLC23A2	RNH1	-0.164779	0.000763643	pearson
SLC8B1	RNH1	-0.013906	0.777864	pearson
TMEM230	RNH1	-0.10929	0.0261713	pearson
DZANK1	RNH1	-0.23182	1.86e-06	pearson
KDM2B	RNH1	-0.228487	2.64e-06	pearson
CFAP61	RNH1	-0.0153918	0.754852	pearson
LHX5	RNH1	0.0171826	0.727403	pearson
TASP1	RNH1	-0.0591258	0.229967	pearson
OAS1	RNH1	-0.0726254	0.140161	pearson
GCN1	RNH1	-0.272579	1.74e-08	pearson
RPLP0	RNH1	-0.112466	0.0220971	pearson
PXN	RNH1	0.090713	0.065189	pearson
SIRT4	RNH1	0.118945	0.0154587	pearson
RPH3A	RNH1	-0.0772361	0.116621	pearson
KIF16B	RNH1	-0.023487	0.63371	pearson
TRMT6	RNH1	-0.0722934	0.141988	pearson
CHGB	RNH1	-0.0232007	0.637855	pearson
PEBP1	RNH1	-0.314279	6.08e-11	pearson
TBX5	RNH1	-0.0612114	0.213917	pearson
BRAP	RNH1	-0.210411	1.58e-05	pearson
ERP29	RNH1	-0.097713	0.0469323	pearson
NOS1	RNH1	0.00929827	0.850388	pearson
FUS	RNH1	-0.0556038	0.258972	pearson
IGBP1	RNH1	-0.0720112	0.143555	pearson
FXYD5	RNH1	0.196472	5.7e-05	pearson
ZNF302	RNH1	-0.241118	6.88e-07	pearson
GRAMD1A	RNH1	0.103105	0.0359831	pearson
FXYD3	RNH1	-0.161266	0.000991448	pearson
HEPH	RNH1	0.0323241	0.5119	pearson
CDIP1	RNH1	0.198918	4.58e-05	pearson
CMTM1	RNH1	-0.0760211	0.122501	pearson
KCNH4	RNH1	-0.108007	0.0279913	pearson
GANAB	RNH1	0.0473467	0.336557	pearson
GMIP	RNH1	-0.205076	2.61e-05	pearson
RBM41	RNH1	-0.202108	3.43e-05	pearson
BIRC5	RNH1	0.0553009	0.26158	pearson
LAG3	RNH1	0.243574	5.25e-07	pearson
MLF2	RNH1	-0.0475757	0.334223	pearson
OTUB2	RNH1	0.00564655	0.908807	pearson
DDX24	RNH1	0.308059	1.5e-10	pearson
ZBTB25	RNH1	-0.166754	0.000657868	pearson
NECAP1	RNH1	-0.131663	0.00730663	pearson
ARHGAP4	RNH1	0.196571	5.65e-05	pearson
ANKRD24	RNH1	-0.0987143	0.0447102	pearson
DHX32	RNH1	-0.0340725	0.489328	pearson
RCOR1	RNH1	0.0710385	0.149057	pearson
GPATCH2L	RNH1	-0.167552	0.000619121	pearson
LTBP4	RNH1	0.0928224	0.0591573	pearson
BLVRB	RNH1	0.175421	0.000335348	pearson
SLC9A1	RNH1	-0.070614	0.151507	pearson
SPTLC1	RNH1	-0.000799398	0.987062	pearson
PAPOLA	RNH1	-0.13879	0.00466748	pearson
CCNK	RNH1	-0.0266179	0.589161	pearson
PCBP4	RNH1	-0.0528118	0.283693	pearson
RGS1	RNH1	0.157309	0.00132226	pearson
YPEL3	RNH1	-0.205909	2.42e-05	pearson
MRPS33	RNH1	-0.264714	4.56e-08	pearson
NDUFB2	RNH1	-0.011093	0.821952	pearson
NUDC	RNH1	0.14189	0.00381636	pearson
MAEA	RNH1	-0.08029	0.102816	pearson
ICAM1	RNH1	0.232193	1.79e-06	pearson
STRN4	RNH1	-0.102827	0.0364878	pearson
IRAK3	RNH1	0.117633	0.0166404	pearson
LYZ	RNH1	-0.0176118	0.720874	pearson
SI	RNH1	-0.0456364	0.354322	pearson
MUL1	RNH1	0.254465	1.53e-07	pearson
TFAP4	RNH1	-0.140143	0.00427701	pearson
PDCD7	RNH1	-0.165114	0.000744616	pearson
SPG21	RNH1	-0.145159	0.00307328	pearson
FETUB	RNH1	0.0538137	0.274645	pearson
DNAJB11	RNH1	0.032474	0.509945	pearson
P3H2	RNH1	0.133731	0.0064291	pearson
THPO	RNH1	0.0920141	0.0614116	pearson
CHRD	RNH1	0.13404	0.00630673	pearson
FLT3LG	RNH1	0.262794	5.74e-08	pearson
RAB11FIP3	RNH1	-0.19158	8.76e-05	pearson
GNPTG	RNH1	0.0308215	0.531724	pearson
ZNF268	RNH1	-0.274128	1.43e-08	pearson
GOLGA3	RNH1	-0.142301	0.00371463	pearson
PABPC4	RNH1	-0.130574	0.00781068	pearson
CD209	RNH1	0.269342	2.59e-08	pearson
CERS4	RNH1	-0.0727106	0.139696	pearson
MCOLN1	RNH1	0.0336548	0.494672	pearson
USP48	RNH1	-0.174818	0.000351817	pearson
EFNB1	RNH1	0.095317	0.0526275	pearson
PDPR	RNH1	-0.0436917	0.375224	pearson
GLG1	RNH1	0.161476	0.000976286	pearson
KIF4A	RNH1	-0.00456897	0.926154	pearson
TNRC6A	RNH1	-0.189367	0.000105953	pearson
PLEKHG2	RNH1	0.0754057	0.125566	pearson
DLL3	RNH1	-0.0753027	0.126085	pearson
NAT14	RNH1	0.0204141	0.678762	pearson
PITPNM2	RNH1	0.111195	0.0236565	pearson
EXOC1	RNH1	-0.1969	5.49e-05	pearson
RBM27	RNH1	-0.225356	3.64e-06	pearson
POU4F3	RNH1	-0.0482722	0.327187	pearson
OSBPL8	RNH1	-0.138233	0.00483736	pearson
DTX2	RNH1	-0.0119467	0.808506	pearson
NLRC4	RNH1	0.222792	4.71e-06	pearson
PUS7	RNH1	-0.048909	0.320838	pearson
LAMB4	RNH1	0.0157369	0.749537	pearson
NRCAM	RNH1	0.0574008	0.243872	pearson
LAMB1	RNH1	0.0791028	0.10802	pearson
SLC26A4	RNH1	0.0166796	0.735079	pearson
SLC26A3	RNH1	-0.0564149	0.252078	pearson
DLD	RNH1	-0.067637	0.169559	pearson
WDR7	RNH1	-0.0505194	0.305144	pearson
TXNL1	RNH1	-0.0439368	0.372548	pearson
IL5RA	RNH1	-0.0125719	0.798694	pearson
ABCC6	RNH1	0.0959426	0.0510877	pearson
CMTM6	RNH1	-0.217098	8.3e-06	pearson
ITGA6	RNH1	0.214807	1.04e-05	pearson
RAPGEF4	RNH1	-0.155728	0.00148074	pearson
MAP3K20	RNH1	0.209043	1.8e-05	pearson
SMPX	RNH1	-0.143924	0.00333702	pearson
FH	RNH1	0.0375286	0.446326	pearson
SEL1L3	RNH1	0.0313793	0.52432	pearson
TF	RNH1	-0.173961	0.000376495	pearson
CDV3	RNH1	0.0888942	0.0707873	pearson
MYO15A	RNH1	-0.0593665	0.228072	pearson
ALKBH5	RNH1	0.0381465	0.438871	pearson
APOH	RNH1	-0.0798883	0.104554	pearson
NLRP1	RNH1	0.0280481	0.569302	pearson
PITPNM3	RNH1	0.151383	0.00201038	pearson
SPAG7	RNH1	0.136578	0.005376	pearson
ORC6	RNH1	-0.218496	7.24e-06	pearson
ZFHX4	RNH1	0.107692	0.0284544	pearson
SLC17A6	RNH1	-0.0920403	0.0613375	pearson
CPA1	RNH1	-0.0181026	0.713432	pearson
ZC3HC1	RNH1	0.145176	0.00306983	pearson
ESR1	RNH1	-0.0195327	0.691907	pearson
RGS17	RNH1	-0.111246	0.0235919	pearson
ANGPT2	RNH1	-0.100133	0.0417135	pearson
TMEM101	RNH1	0.0997526	0.0425001	pearson
CD200	RNH1	0.0341053	0.48891	pearson
CCDC80	RNH1	0.196135	5.87e-05	pearson
CMA1	RNH1	0.12376	0.0117277	pearson
PSME1	RNH1	0.17674	0.000301806	pearson
PPP2R3C	RNH1	0.188927	0.000110022	pearson
HAUS4	RNH1	0.061526	0.211567	pearson
JPH4	RNH1	-0.066518	0.176745	pearson
MYH7	RNH1	-0.0854216	0.0825652	pearson
CEBPE	RNH1	0.263427	5.32e-08	pearson
SLC7A8	RNH1	0.164775	0.000763868	pearson
OSGEP	RNH1	-0.135591	0.00572207	pearson
SLC22A17	RNH1	-0.0351273	0.475973	pearson
RNF31	RNH1	0.0746771	0.129272	pearson
SCFD1	RNH1	0.00147987	0.976051	pearson
G2E3	RNH1	-0.192002	8.44e-05	pearson
HECTD1	RNH1	-0.168383	0.000581018	pearson
HNRNPC	RNH1	-0.0285635	0.562223	pearson
RPGRIP1	RNH1	-0.23119	1.99e-06	pearson
SUPT16H	RNH1	0.011509	0.815393	pearson
TOX4	RNH1	0.0981444	0.0459639	pearson
GEMIN2	RNH1	0.126304	0.0100983	pearson
TGM1	RNH1	0.0691808	0.160007	pearson
TINF2	RNH1	0.230721	2.09e-06	pearson
DAZL	RNH1	0.0254807	0.605176	pearson
TBL1Y	RNH1	-0.0640232	0.193575	pearson
SEMA6A	RNH1	-0.288441	2.25e-09	pearson
TRPM7	RNH1	-0.237311	1.04e-06	pearson
TYRO3	RNH1	-0.0233805	0.635251	pearson
WDR76	RNH1	0.0375961	0.445508	pearson
CAPN3	RNH1	0.0102672	0.83501	pearson
SNAP23	RNH1	-0.099034	0.0440195	pearson
TBX15	RNH1	0.015535	0.752645	pearson
PHGDH	RNH1	-0.118707	0.0156669	pearson
COL9A3	RNH1	0.0127208	0.796363	pearson
EZR	RNH1	0.0509604	0.300936	pearson
MYL6	RNH1	0.186479	0.000135439	pearson
AGO1	RNH1	-0.159795	0.00110434	pearson
TEKT2	RNH1	-0.0986896	0.0447638	pearson
CLSPN	RNH1	0.0468767	0.341382	pearson
RFFL	RNH1	-0.225913	3.44e-06	pearson
UNC13D	RNH1	0.0286853	0.560557	pearson
MFSD11	RNH1	-0.0484857	0.32505	pearson
DPYSL2	RNH1	0.102079	0.0378796	pearson
TGFB2	RNH1	0.245924	4.05e-07	pearson
GPATCH2	RNH1	-0.277164	9.74e-09	pearson
NUP50	RNH1	-0.176126	0.00031702	pearson
CDC45	RNH1	-0.062296	0.205895	pearson
COMT	RNH1	-0.116347	0.0178744	pearson
ADA2	RNH1	0.134631	0.00607789	pearson
VNN3	RNH1	0.0719143	0.144096	pearson
ECHDC1	RNH1	-0.0465398	0.344867	pearson
LRRFIP2	RNH1	0.0516565	0.294373	pearson
SEC22C	RNH1	0.135203	0.00586368	pearson
XYLB	RNH1	-0.182736	0.000185187	pearson
HDAC6	RNH1	-0.181952	0.000197573	pearson
OR1I1	RNH1	0.0205083	0.677362	pearson
GABRP	RNH1	0.00134587	0.978219	pearson
KRT31	RNH1	0.0804492	0.102133	pearson
CDC6	RNH1	-0.126777	0.00981876	pearson
UPRT	RNH1	-0.139311	0.00451361	pearson
CDC23	RNH1	-0.101722	0.0385607	pearson
AAAS	RNH1	-0.0363017	0.461341	pearson
CBX5	RNH1	-0.086	0.0805003	pearson
FMO2	RNH1	0.079658	0.105561	pearson
SUCO	RNH1	-0.321235	2.16e-11	pearson
MSH2	RNH1	-0.15806	0.00125258	pearson
MAP3K1	RNH1	-0.0258923	0.599357	pearson
DHPS	RNH1	-0.106182	0.0307687	pearson
HOOK2	RNH1	-0.115546	0.0186837	pearson
NXPE1	RNH1	-0.0540319	0.272701	pearson
ARCN1	RNH1	0.0137862	0.779729	pearson
EPB41L4B	RNH1	-0.210566	1.56e-05	pearson
TMEM38B	RNH1	-0.0103082	0.83436	pearson
PSMD5	RNH1	0.0747275	0.129013	pearson
PTGS1	RNH1	0.190895	9.29e-05	pearson
NUP188	RNH1	0.108813	0.0268356	pearson
CRAT	RNH1	-0.108759	0.0269116	pearson
SH2D3C	RNH1	0.0683636	0.165011	pearson
NANS	RNH1	0.178345	0.000265227	pearson
[truncated: 17,347 more rows]

## Sheet: Table S5
Table S5. Molecular subtype information of TCGA-BLCA
ID	UNC_subtype	Baylor_subtype	TCGA_subtype	MDA_subtype	Lund_subtype	CIT_subtype	Consensus_subtype	Cluster	RNH1
TCGA-2F-A9KP	Luminal	Differentiated	Luminal_papillary	luminal	UroA-Prog	MC1	LumP	C2	High
TCGA-2F-A9KQ	Luminal	Differentiated	Luminal_papillary	luminal	UroA-Prog	MC1	LumP	C2	High
TCGA-4Z-AA7M	Luminal	Differentiated	Luminal_papillary	luminal	UroC	MC1	LumP	C2	High
TCGA-4Z-AA7Y	Luminal	Differentiated	Luminal_papillary	luminal	UroA-Prog	MC1	LumP	C2	High
TCGA-4Z-AA81	Basal	Differentiated	Luminal_papillary	basal	GU-Inf	MC7	Ba/Sq	C1	High
TCGA-4Z-AA82	Basal	Basal	Basal_squamous	basal	Ba/Sq-Inf	MC7	Ba/Sq	C2	High
TCGA-4Z-AA83	Luminal	Basal	Luminal_papillary	p53-like	UroA-Prog	MC1	LumP	C1	High
TCGA-4Z-AA86	Basal	Basal	Basal_squamous	basal	Ba/Sq-Inf	MC7	Ba/Sq	C2	High
TCGA-4Z-AA89	Luminal	Differentiated	Luminal_papillary	luminal	UroA-Prog	MC1	LumP	C1	High
TCGA-5N-A9KI	Luminal	Differentiated	Luminal_infiltrated	luminal	GU-Inf	MC2	LumU	C1	High
TCGA-BL-A13I	Basal	Basal	Basal_squamous	basal	Mes-like	MC7	Ba/Sq	C1	High
TCGA-BL-A5ZZ	Basal	Basal	Basal_squamous	basal	Mes-like	MC7	Ba/Sq	C2	High
TCGA-BT-A0YX	Basal	Basal	Basal_squamous	basal	UroB	MC7	Ba/Sq	C1	High
TCGA-BT-A20O	Basal	Basal	Basal_squamous	basal	Mes-like	MC7	Ba/Sq	C1	High
TCGA-BT-A20Q	Luminal	Differentiated	Luminal_infiltrated	p53-like	Uro-Inf	MC4	LumP	C2	High
TCGA-BT-A20W	Luminal	Differentiated	Luminal	luminal	UroC	MC1	LumNS	C2	High
TCGA-BT-A20X	Basal	Basal	Basal_squamous	basal	Ba/Sq	MC7	Ba/Sq	C2	High
TCGA-BT-A2LB	Luminal	Differentiated	Luminal_infiltrated	p53-like	Uro-Inf	MC2	LumNS	C2	High
TCGA-BT-A2LD	Basal	Differentiated	Basal_squamous	p53-like	GU-Inf	MC7	Ba/Sq	C2	High
TCGA-BT-A3PH	Luminal	Differentiated	Luminal	luminal	UroA-Prog	MC1	LumP	C2	High
TCGA-BT-A3PJ	Basal	Basal	Basal_squamous	basal	Ba/Sq-Inf	MC7	Ba/Sq	C2	High
TCGA-BT-A42E	Basal	Basal	Basal_squamous	basal	Ba/Sq	MC7	Ba/Sq	C1	High
TCGA-BT-A42F	Basal	Basal	Basal_squamous	basal	Ba/Sq	MC7	Ba/Sq	C1	High
TCGA-C4-A0F1	Basal	Basal	Basal_squamous	basal	Ba/Sq	MC7	Ba/Sq	C2	High
TCGA-C4-A0F7	Basal	Basal	Basal_squamous	basal	UroB	MC7	Ba/Sq	C2	High
TCGA-CF-A1HR	Luminal	Differentiated	Luminal_papillary	p53-like	UroA-Prog	MC1	LumP	C2	High
TCGA-CF-A3MG	Luminal	Differentiated	Luminal_papillary	luminal	UroA-Prog	MC1	LumP	C2	High
TCGA-CF-A47S	Luminal	Differentiated	Luminal_papillary	p53-like	UroA-Prog	MC1	LumP	C1	High
TCGA-CF-A47T	Luminal	Differentiated	Luminal_papillary	luminal	UroA-Prog	MC1	LumP	C2	High
TCGA-CF-A47V	Luminal	Differentiated	Luminal_papillary	p53-like	UroA-Prog	MC1	LumP	C2	High
TCGA-CF-A47W	Luminal	Differentiated	Luminal_papillary	p53-like	UroA-Prog	MC1	LumP	C2	High
TCGA-CF-A9FM	Luminal	Basal	Luminal_papillary	p53-like	UroA-Prog	MC1	LumP	C1	High
TCGA-CU-A0YN	Basal	Basal	Basal_squamous	basal	Ba/Sq	MC7	Ba/Sq	C2	High
TCGA-CU-A3QU	Luminal	Differentiated	Luminal_papillary	luminal	GU	MC1	LumU	C2	High
TCGA-CU-A72E	Basal	Basal	Basal_squamous	basal	UroB	MC7	Ba/Sq	C2	High
TCGA-DK-A1A3	Luminal	Differentiated	Luminal_infiltrated	luminal	GU-Inf	MC2	LumU	C1	High
TCGA-DK-A1A5	Basal	Differentiated	Luminal_infiltrated	p53-like	Ba/Sq-Inf	MC7	Ba/Sq	C2	High
TCGA-DK-A1AA	Luminal	Basal	Luminal_papillary	luminal	UroA-Prog	MC1	LumP	C2	High
TCGA-DK-A1AE	Basal	Basal	Basal_squamous	basal	UroB	MC7	Ba/Sq	C1	High
TCGA-DK-A1AF	Luminal	Differentiated	Luminal_infiltrated	p53-like	Ba/Sq-Inf	MC4	Ba/Sq	C2	High
TCGA-DK-A1AG	Luminal	Basal	Luminal_papillary	p53-like	UroA-Prog	MC1	LumP	C1	High
TCGA-DK-A3IQ	Basal	Differentiated	Luminal_infiltrated	p53-like	Mes-like	MC4	Stroma-rich	C2	High
TCGA-DK-A3IS	Luminal	Differentiated	Luminal_papillary	luminal	UroA-Prog	MC1	LumP	C1	High
TCGA-DK-A3IU	Basal	Differentiated	Basal_squamous	basal	Ba/Sq-Inf	MC4	Ba/Sq	C1	High
TCGA-DK-A3IV	Luminal	Differentiated	Luminal_papillary	luminal	GU	MC1	LumU	C1	High
TCGA-DK-A3WX	Basal	Basal	Basal_squamous	basal	Ba/Sq	MC7	Ba/Sq	C2	High
TCGA-DK-A6AW	Luminal	Differentiated	Luminal_papillary	p53-like	GU	MC1	LumP	C2	High
TCGA-DK-A6B0	Luminal	Differentiated	Luminal_papillary	p53-like	UroA-Prog	MC1	LumP	C1	High
TCGA-DK-A6B2	Luminal	Differentiated	Luminal	p53-like	UroC	MC2	LumNS	C1	High
TCGA-DK-A6B6	Luminal	Differentiated	Luminal_papillary	luminal	UroC	MC1	LumP	C1	High
TCGA-DK-AA6M	Basal	Basal	Basal_squamous	basal	Ba/Sq-Inf	MC7	Ba/Sq	C1	High
TCGA-DK-AA6Q	Basal	Basal	Basal_squamous	basal	Ba/Sq	MC7	Ba/Sq	C2	High
TCGA-DK-AA6W	Basal	Basal	Neuronal	p53-like	Sc/NE-like	MC7	NE-like	C1	High
TCGA-DK-AA6X	Luminal	Basal	Luminal_infiltrated	p53-like	GU	MC1	LumP	C1	High
TCGA-DK-AA71	Luminal	Differentiated	Luminal_papillary	luminal	UroA-Prog	MC1	LumP	C1	High
TCGA-DK-AA74	Basal	Basal	Basal_squamous	basal	Ba/Sq-Inf	MC7	Ba/Sq	C1	High
TCGA-E5-A2PC	Basal	Basal	Luminal_papillary	luminal	UroB	MC7	Ba/Sq	C1	High
TCGA-E5-A4TZ	Luminal	Basal	Luminal_papillary	basal	UroB	MC7	Ba/Sq	C1	High
TCGA-E7-A541	Luminal	Differentiated	Luminal_papillary	luminal	GU	MC1	LumP	C1	High
TCGA-E7-A5KE	Luminal	Differentiated	Luminal_papillary	luminal	GU	MC1	LumP	C2	High
TCGA-E7-A5KF	Luminal	Basal	Luminal_papillary	luminal	UroA-Prog	MC1	LumP	C2	High
TCGA-E7-A677	Luminal	Differentiated	Luminal_papillary	p53-like	UroA-Prog	MC1	LumP	C2	High
TCGA-E7-A678	Luminal	Basal	Luminal_papillary	p53-like	UroA-Prog	MC1	LumP	C1	High
TCGA-E7-A6MD	Luminal	Basal	Luminal_infiltrated	p53-like	UroA-Prog	MC4	Stroma-rich	C2	High
TCGA-E7-A6MF	Luminal	Basal	Luminal_papillary	p53-like	UroA-Prog	MC1	LumP	C2	High
TCGA-E7-A7DV	Basal	Differentiated	Basal_squamous	basal	Mes-like	MC7	Ba/Sq	C1	High
TCGA-E7-A7XN	Basal	Basal	Basal_squamous	basal	Ba/Sq	MC7	Ba/Sq	C1	High
TCGA-E7-A8O7	Luminal	Basal	Luminal_papillary	p53-like	UroA-Prog	MC1	LumP	C1	High
TCGA-E7-A97P	Basal	Basal	Basal_squamous	basal	Ba/Sq	MC7	Ba/Sq	C1	High
TCGA-FD-A3B3	Basal	Basal	Basal_squamous	basal	Ba/Sq	MC7	Ba/Sq	C1	High
TCGA-FD-A3B4	Basal	Basal	Basal_squamous	basal	Ba/Sq	MC7	Ba/Sq	C2	High
TCGA-FD-A3B6	Basal	Basal	Basal_squamous	basal	Ba/Sq-Inf	MC7	Ba/Sq	C1	High
TCGA-FD-A3B8	Basal	Basal	Basal_squamous	basal	Ba/Sq-Inf	MC4	Ba/Sq	C1	High
TCGA-FD-A3N5	Basal	Basal	Basal_squamous	basal	Ba/Sq	MC7	Ba/Sq	C2	High
TCGA-FD-A3N6	Basal	Basal	Basal_squamous	basal	Ba/Sq	MC7	Ba/Sq	C2	High
TCGA-FD-A3NA	Luminal	Differentiated	Luminal_papillary	basal	UroC	MC1	LumP	C1	High
TCGA-FD-A3SM	Basal	Differentiated	Luminal_infiltrated	p53-like	Ba/Sq-Inf	MC7	Stroma-rich	C2	High
TCGA-FD-A3SN	Basal	Differentiated	Basal_squamous	p53-like	Ba/Sq-Inf	MC7	Ba/Sq	C2	High
TCGA-FD-A3SO	Basal	Basal	Basal_squamous	basal	Ba/Sq	MC7	Ba/Sq	C1	High
TCGA-FD-A3SP	Basal	Basal	Basal_squamous	basal	Mes-like	MC4	Ba/Sq	C2	High
TCGA-FD-A3SQ	Luminal	Differentiated	Luminal_infiltrated	p53-like	Uro-Inf	MC4	Stroma-rich	C2	High
TCGA-FD-A43S	Basal	Differentiated	Luminal_infiltrated	p53-like	Uro-Inf	MC4	Stroma-rich	C1	High
TCGA-FD-A43U	Luminal	Differentiated	Luminal_infiltrated	p53-like	Uro-Inf	MC2	LumNS	C1	High
TCGA-FD-A43X	Luminal	Differentiated	Luminal_papillary	luminal	UroA-Prog	MC1	LumP	C2	High
TCGA-FD-A43Y	Basal	Basal	Basal_squamous	basal	Ba/Sq	MC7	Ba/Sq	C2	High
TCGA-FD-A5BT	Basal	Differentiated	Basal_squamous	basal	Mes-like	MC4	Ba/Sq	C1	High
TCGA-FD-A5BU	Basal	Basal	Basal_squamous	basal	Ba/Sq	MC7	Ba/Sq	C1	High
TCGA-FD-A5BX	Basal	Basal	Basal_squamous	basal	Mes-like	MC4	Stroma-rich	C2	High
TCGA-FD-A5BY	Basal	Basal	Basal_squamous	basal	Ba/Sq	MC7	Ba/Sq	C2	High
TCGA-FD-A5BZ	Luminal	Differentiated	Luminal_infiltrated	p53-like	Uro-Inf	MC5	Stroma-rich	C2	High
TCGA-FD-A5C1	Basal	Basal	Basal_squamous	basal	Ba/Sq-Inf	MC7	Ba/Sq	C1	High
TCGA-FD-A62N	Basal	Basal	Basal_squamous	basal	Ba/Sq-Inf	MC7	Ba/Sq	C1	High
TCGA-FD-A62O	Luminal	Differentiated	Luminal	luminal	UroA-Prog	MC1	LumP	C2	High
TCGA-FD-A62S	Basal	Basal	Basal_squamous	basal	Ba/Sq-Inf	MC7	Ba/Sq	C2	High
TCGA-FD-A6TB	Basal	Differentiated	Luminal_infiltrated	p53-like	Mes-like	MC4	Stroma-rich	C1	High
TCGA-FD-A6TE	Luminal	Basal	Luminal_papillary	luminal	GU	MC1	LumP	C1	High
TCGA-FD-A6TF	Basal	Differentiated	Luminal_infiltrated	p53-like	GU-Inf	MC4	Ba/Sq	C2	High
TCGA-FD-A6TG	Luminal	Differentiated	Luminal_infiltrated	p53-like	Uro-Inf	MC4	Stroma-rich	C2	High
TCGA-FD-A6TI	Luminal	Differentiated	Luminal	p53-like	UroC	MC2	LumNS	C1	High
TCGA-FD-A6TK	Basal	Differentiated	Basal_squamous	basal	Ba/Sq-Inf	MC7	Ba/Sq	C1	High
TCGA-FJ-A3Z9	Luminal	Differentiated	Luminal_papillary	luminal	UroA-Prog	MC1	LumP	C2	High
TCGA-FJ-A871	Basal	Differentiated	Neuronal	basal	Mes-like	MC7	Ba/Sq	C2	High
TCGA-FT-A61P	Basal	Differentiated	Basal_squamous	basal	Mes-like	MC4	Ba/Sq	C1	High
TCGA-G2-A2EC	Luminal	Differentiated	Luminal_infiltrated	p53-like	UroA-Prog	MC2	LumNS	C2	High
TCGA-G2-A2EF	Basal	Basal	Basal_squamous	basal	Ba/Sq-Inf	MC7	Ba/Sq	C1	High
TCGA-G2-A2EJ	Basal	Basal	Basal_squamous	basal	Ba/Sq	MC7	Ba/Sq	C2	High
TCGA-G2-A2EK	Luminal	Basal	Luminal_papillary	p53-like	UroA-Prog	MC1	LumP	C2	High
TCGA-G2-A2EO	Luminal	Differentiated	Luminal_infiltrated	p53-like	Uro-Inf	MC1	LumP	C1	High
TCGA-G2-A2ES	Basal	Basal	Basal_squamous	basal	Ba/Sq	MC7	Ba/Sq	C1	High
TCGA-G2-A3IB	Basal	Basal	Basal_squamous	basal	Ba/Sq	MC7	Ba/Sq	C2	High
TCGA-G2-AA3C	Basal	Basal	Basal_squamous	basal	Mes-like	MC7	Ba/Sq	C1	High
TCGA-G2-AA3D	Luminal	Differentiated	Luminal_papillary	luminal	UroA-Prog	MC1	LumP	C2	High
TCGA-GC-A3OO	Luminal	Differentiated	Luminal_infiltrated	p53-like	GU-Inf	MC4	Stroma-rich	C2	High
TCGA-GC-A3RB	Luminal	Basal	Luminal_papillary	luminal	UroA-Prog	MC1	LumP	C1	High
TCGA-GC-A3RC	Basal	Basal	Basal_squamous	basal	Ba/Sq	MC7	Ba/Sq	C1	High
TCGA-GC-A3WC	Basal	Basal	Basal_squamous	basal	Ba/Sq	MC7	Ba/Sq	C1	High
TCGA-GC-A4ZW	Luminal	Basal	Luminal_papillary	p53-like	Sc/NE-like	MC1	LumU	C2	High
TCGA-GC-A6I1	Basal	Basal	Basal_squamous	basal	Ba/Sq-Inf	MC7	Ba/Sq	C1	High
TCGA-GC-A6I3	Luminal	Differentiated	Luminal	luminal	UroC	MC1	LumP	C1	High
TCGA-GD-A3OP	Luminal	Differentiated	Luminal	p53-like	UroC	MC2	LumNS	C2	High
TCGA-GD-A3OQ	Basal	Basal	Luminal_papillary	basal	Ba/Sq	MC7	Ba/Sq	C2	High
TCGA-GD-A3OS	Basal	Differentiated	Neuronal	basal	Mes-like	MC7	Ba/Sq	C2	High
TCGA-GU-A42P	Luminal	Differentiated	Luminal_papillary	luminal	GU	MC1	LumU	C2	High
TCGA-GU-A42Q	Basal	Basal	Basal_squamous	basal	Ba/Sq	MC7	Ba/Sq	C2	High
TCGA-GU-A762	Basal	Basal	Basal_squamous	basal	Ba/Sq-Inf	MC7	Ba/Sq	C1	High
TCGA-GU-A763	Luminal	Basal	Luminal_papillary	luminal	UroA-Prog	MC1	LumP	C1	High
TCGA-GU-A764	Basal	Basal	Basal_squamous	basal	Ba/Sq-Inf	MC7	Ba/Sq	C1	High
TCGA-GU-A766	Basal	Basal	Basal_squamous	basal	Ba/Sq-Inf	MC7	Ba/Sq	C1	High
TCGA-GU-AATO	Luminal	Differentiated	Luminal_infiltrated	basal	GU-Inf	MC2	Ba/Sq	C1	High
TCGA-GU-AATQ	Basal	Basal	Basal_squamous	basal	UroB	MC7	Ba/Sq	C1	High
TCGA-GV-A3JX	Luminal	Differentiated	Luminal_papillary	luminal	GU	MC1	LumU	C1	High
TCGA-HQ-A5ND	Basal	Basal	Basal_squamous	basal	UroB	MC7	Ba/Sq	C1	High
TCGA-HQ-A5NE	Basal	Basal	Basal_squamous	basal	Ba/Sq	MC7	Ba/Sq	C2	High
TCGA-K4-A3WU	Luminal	Differentiated	Luminal	p53-like	UroC	MC2	LumNS	C2	High
TCGA-K4-A4AB	Basal	Differentiated	Luminal_infiltrated	p53-like	Uro-Inf	MC4	LumP	C1	High
TCGA-K4-A4AC	Basal	Basal	Basal_squamous	basal	Ba/Sq	MC7	Ba/Sq	C1	High
TCGA-K4-A54R	Basal	Differentiated	Luminal_infiltrated	luminal	Mes-like	MC7	LumNS	C2	High
TCGA-K4-A5RH	Basal	Basal	Basal_squamous	basal	Mes-like	MC7	Ba/Sq	C1	High
TCGA-K4-A5RI	Basal	Basal	Basal_squamous	basal	UroB	MC7	Ba/Sq	C1	High
TCGA-K4-A5RJ	Basal	Basal	Basal_squamous	basal	Mes-like	MC7	Ba/Sq	C1	High
TCGA-K4-A6FZ	Basal	Basal	Luminal_papillary	basal	UroB	MC7	Ba/Sq	C1	High
TCGA-K4-AAQO	Luminal	Differentiated	Luminal_infiltrated	p53-like	UroC	MC4	Stroma-rich	C2	High
TCGA-KQ-A41P	Luminal	Differentiated	Luminal	p53-like	Uro-Inf	MC1	LumP	C2	High
TCGA-LC-A66R	Basal	Basal	Basal_squamous	basal	Ba/Sq-Inf	MC7	Ba/Sq	C1	High
TCGA-PQ-A6FI	Basal	Basal	Basal_squamous	basal	Ba/Sq	MC7	Ba/Sq	C2	High
TCGA-PQ-A6FN	Basal	Basal	Basal_squamous	basal	Ba/Sq	MC7	Ba/Sq	C2	High
TCGA-R3-A69X	Luminal	Differentiated	Luminal_infiltrated	p53-like	Uro-Inf	MC4	LumNS	C2	High
TCGA-SY-A9G0	Basal	Differentiated	Luminal_infiltrated	p53-like	Mes-like	MC4	Stroma-rich	C2	High
TCGA-SY-A9G5	Basal	Basal	Basal_squamous	basal	Ba/Sq-Inf	MC7	Ba/Sq	C2	High
TCGA-UY-A78L	Basal	Basal	Basal_squamous	basal	Ba/Sq	MC7	Ba/Sq	C2	High
TCGA-UY-A78M	Luminal	Differentiated	Luminal	luminal	Uro-Inf	MC1	LumP	C2	High
TCGA-UY-A78P	Basal	Basal	Basal_squamous	basal	Ba/Sq	MC7	Ba/Sq	C1	High
TCGA-UY-A8OB	Basal	Basal	Basal_squamous	basal	Ba/Sq	MC7	Ba/Sq	C2	High
TCGA-UY-A8OC	Basal	Basal	Basal_squamous	basal	Ba/Sq-Inf	MC7	Ba/Sq	C2	High
TCGA-UY-A9PA	Luminal	Basal	Luminal_papillary	p53-like	UroA-Prog	MC1	LumP	C1	High
TCGA-UY-A9PB	Basal	Basal	Basal_squamous	basal	Ba/Sq-Inf	MC7	Ba/Sq	C1	High
TCGA-XF-A8HB	Luminal	Basal	Luminal_papillary	luminal	UroB	MC1	LumP	C1	High
TCGA-XF-A8HD	Basal	Differentiated	Basal_squamous	p53-like	GU-Inf	MC7	Ba/Sq	C1	High
TCGA-XF-A8HE	Basal	Basal	Basal_squamous	basal	Ba/Sq	MC7	Ba/Sq	C1	High
TCGA-XF-A8HH	Luminal	Differentiated	Luminal	p53-like	UroC	MC2	LumNS	C2	High
TCGA-XF-A8HI	Luminal	Basal	Luminal_papillary	luminal	UroA-Prog	MC1	LumP	C2	High
TCGA-XF-A9SK	Basal	Differentiated	Luminal_infiltrated	p53-like	Uro-Inf	MC4	Stroma-rich	C2	High
TCGA-XF-A9SL	Basal	Differentiated	Luminal_infiltrated	p53-like	Mes-like	MC4	Stroma-rich	C2	High
TCGA-XF-A9SM	Basal	Basal	Basal_squamous	basal	Ba/Sq-Inf	MC7	Ba/Sq	C1	High
TCGA-XF-A9SP	Luminal	Differentiated	Luminal_infiltrated	p53-like	Uro-Inf	MC4	Stroma-rich	C2	High
TCGA-XF-A9SW	Basal	Differentiated	Luminal_infiltrated	p53-like	Mes-like	MC4	Stroma-rich	C2	High
TCGA-XF-A9SX	Basal	Differentiated	Basal_squamous	basal	Mes-like	MC7	Ba/Sq	C1	High
TCGA-XF-A9SY	Basal	Basal	Basal_squamous	basal	Ba/Sq-Inf	MC7	Ba/Sq	C2	High
TCGA-XF-A9T0	Luminal	Differentiated	Luminal	luminal	UroC	MC1	LumNS	C1	High
TCGA-XF-A9T3	Basal	Differentiated	Basal_squamous	p53-like	Mes-like	MC7	Ba/Sq	C2	High
TCGA-XF-A9T4	Basal	Basal	Basal_squamous	basal	Ba/Sq	MC7	Ba/Sq	C2	High
TCGA-XF-A9T8	Basal	Basal	Basal_squamous	basal	Ba/Sq	MC7	Ba/Sq	C1	High
TCGA-XF-AAME	Basal	Basal	Basal_squamous	p53-like	Ba/Sq-Inf	MC7	Ba/Sq	C2	High
TCGA-XF-AAMH	Basal	Differentiated	Neuronal	basal	Sc/NE-like	MC7	Ba/Sq	C2	High
TCGA-XF-AAMJ	Basal	Differentiated	Luminal_infiltrated	p53-like	Mes-like	MC4	Stroma-rich	C2	High
TCGA-XF-AAMR	Basal	Basal	Luminal_infiltrated	p53-like	Mes-like	MC4	Stroma-rich	C2	High
TCGA-XF-AAMT	Basal	Basal	Basal_squamous	basal	Ba/Sq-Inf	MC7	Ba/Sq	C2	High
TCGA-XF-AAMW	Basal	Basal	Basal_squamous	basal	Ba/Sq-Inf	MC7	Ba/Sq	C2	High
TCGA-XF-AAMY	Luminal	Differentiated	Luminal	luminal	UroC	MC2	LumNS	C2	High
TCGA-XF-AAN1	Luminal	Differentiated	Luminal_papillary	p53-like	UroA-Prog	MC1	LumP	C2	High
TCGA-XF-AAN2	Basal	Differentiated	Basal_squamous	basal	Ba/Sq	MC7	Ba/Sq	C1	High
TCGA-XF-AAN3	Basal	Basal	Basal_squamous	p53-like	Ba/Sq-Inf	MC7	Ba/Sq	C2	High
TCGA-XF-AAN4	Basal	Basal	Basal_squamous	p53-like	Mes-like	MC4	Stroma-rich	C1	High
TCGA-XF-AAN8	Basal	Basal	Basal_squamous	p53-like	Mes-like	MC4	Stroma-rich	C2	High
TCGA-YC-A89H	Luminal	Differentiated	Luminal_papillary	luminal	UroA-Prog	MC7	LumP	C1	High
TCGA-YC-A8S6	Luminal	Differentiated	Luminal_infiltrated	p53-like	Uro-Inf	MC1	LumP	C2	High
TCGA-YC-A9TC	Basal	Differentiated	Neuronal	basal	Sc/NE-like	MC7	Ba/Sq	C2	High
TCGA-YF-AA3M	Luminal	Differentiated	Luminal_papillary	basal	UroB	MC7	Ba/Sq	C2	High
TCGA-ZF-A9R0	Luminal	Differentiated	Luminal	p53-like	UroC	MC2	LumNS	C2	High
TCGA-ZF-A9R3	Luminal	Differentiated	Luminal_papillary	luminal	UroC	MC1	LumP	C1	High
TCGA-ZF-A9R5	Luminal	Basal	Luminal_papillary	p53-like	UroA-Prog	MC1	LumP	C1	High
TCGA-ZF-A9RE	Basal	Basal	Luminal_papillary	basal	UroB	MC7	Ba/Sq	C2	High
TCGA-ZF-A9RF	Basal	Basal	Basal_squamous	basal	Mes-like	MC7	Ba/Sq	C1	High
TCGA-ZF-AA4N	Basal	Basal	Basal_squamous	basal	Ba/Sq-Inf	MC7	Ba/Sq	C2	High
TCGA-ZF-AA4R	Basal	Differentiated	Luminal_infiltrated	basal	Ba/Sq-Inf	MC7	Ba/Sq	C2	High
TCGA-ZF-AA4U	Luminal	Basal	Luminal_papillary	luminal	UroB	MC1	LumP	C1	High
TCGA-ZF-AA4W	Basal	Basal	Basal_squamous	basal	Ba/Sq	MC7	Ba/Sq	C2	High
TCGA-ZF-AA4X	Luminal	Differentiated	Luminal_papillary	luminal	GU	MC1	LumP	C2	High
TCGA-ZF-AA53	Basal	Basal	Basal_squamous	basal	Ba/Sq-Inf	MC7	Ba/Sq	C1	High
TCGA-ZF-AA54	Basal	Basal	Basal_squamous	basal	Mes-like	MC7	Ba/Sq	C1	High
TCGA-ZF-AA56	Basal	Basal	Basal_squamous	basal	UroB	MC7	Ba/Sq	C1	High
TCGA-ZF-AA58	Basal	Basal	Basal_squamous	basal	Mes-like	MC7	Ba/Sq	C1	High
TCGA-ZF-AA5N	Luminal	Differentiated	Luminal_papillary	p53-like	GU-Inf	MC7	LumP	C2	High
TCGA-ZF-AA5P	Basal	Differentiated	Luminal_infiltrated	p53-like	Mes-like	MC4	Stroma-rich	C2	High
TCGA-2F-A9KO	Luminal	Basal	Luminal_infiltrated	p53-like	UroB	MC1	LumP	C1	Low
TCGA-2F-A9KR	Luminal	Basal	Luminal_papillary	basal	UroB	MC7	Ba/Sq	C2	Low
TCGA-2F-A9KT	Basal	Differentiated	Luminal_papillary	luminal	Ba/Sq	MC7	Ba/Sq	C2	Low
TCGA-2F-A9KW	Luminal	Differentiated	Luminal	p53-like	GU-Inf	MC3	LumU	C2	Low
TCGA-4Z-AA7N	Luminal	Differentiated	Luminal_infiltrated	p53-like	Uro-Inf	MC4	Stroma-rich	C2	Low
TCGA-4Z-AA7O	Luminal	Differentiated	Luminal_papillary	p53-like	UroA-Prog	MC1	LumP	C1	Low
TCGA-4Z-AA7Q	Basal	Basal	Basal_squamous	basal	UroB	MC7	Ba/Sq	C1	Low
TCGA-4Z-AA7R	Luminal	Differentiated	Neuronal	p53-like	GU	MC3	LumU	C2	Low
TCGA-4Z-AA7S	Luminal	Differentiated	Luminal_papillary	luminal	UroA-Prog	MC1	LumP	C2	Low
TCGA-4Z-AA7W	Basal	Basal	Basal_squamous	basal	Ba/Sq-Inf	MC7	Ba/Sq	C1	Low
TCGA-4Z-AA80	Luminal	Differentiated	Luminal_papillary	luminal	UroC	MC1	LumP	C1	Low
TCGA-4Z-AA84	Basal	Differentiated	Basal_squamous	p53-like	GU-Inf	MC7	Ba/Sq	C2	Low
TCGA-4Z-AA87	Luminal	Differentiated	Luminal	luminal	UroC	MC3	LumU	C1	Low
TCGA-5N-A9KM	Luminal	Differentiated	Luminal_infiltrated	p53-like	UroC	MC2	LumNS	C1	Low
TCGA-BL-A0C8	Luminal	Differentiated	Luminal	luminal	UroC	MC1	LumU	C2	Low
TCGA-BL-A13J	Luminal	Basal	Luminal_infiltrated	luminal	Ba/Sq	MC7	Ba/Sq	C2	Low
TCGA-BL-A3JM	Basal	Basal	Neuronal	basal	Sc/NE-like	MC7	NE-like	C1	Low
TCGA-BT-A0S7	Basal	Basal	Neuronal	basal	Ba/Sq	MC7	Ba/Sq	C2	Low
TCGA-BT-A20J	Basal	Basal	Basal_squamous	p53-like	Sc/NE-like	MC7	Ba/Sq	C1	Low
TCGA-BT-A20N	Luminal	Basal	Luminal_papillary	luminal	UroA-Prog	MC7	LumP	C2	Low
TCGA-BT-A20P	Luminal	Differentiated	Luminal_papillary	luminal	UroA-Prog	MC1	LumP	C2	Low
TCGA-BT-A20R	Basal	Differentiated	Luminal_infiltrated	p53-like	GU-Inf	MC4	Stroma-rich	C2	Low
TCGA-BT-A20T	Luminal	Differentiated	Luminal_infiltrated	basal	UroB	MC7	LumP	C2	Low
TCGA-BT-A20U	Basal	Basal	Basal_squamous	basal	Ba/Sq	MC7	Ba/Sq	C2	Low
TCGA-BT-A20V	Basal	Basal	Basal_squamous	basal	Sc/NE-like	MC7	Ba/Sq	C2	Low
TCGA-BT-A2LA	Basal	Differentiated	Neuronal	p53-like	Sc/NE-like	MC6	NE-like	C2	Low
TCGA-BT-A3PK	Basal	Basal	Basal_squamous	basal	Ba/Sq	MC7	Ba/Sq	C2	Low
TCGA-BT-A42C	Luminal	Differentiated	Luminal_papillary	luminal	UroA-Prog	MC1	LumP	C2	Low
TCGA-C4-A0EZ	Basal	Differentiated	Neuronal	basal	Sc/NE-like	MC6	NE-like	C2	Low
TCGA-C4-A0F0	Basal	Basal	Basal_squamous	basal	Ba/Sq-Inf	MC7	Ba/Sq	C2	Low
TCGA-C4-A0F6	Luminal	Differentiated	Luminal	p53-like	UroC	MC1	LumP	C2	Low
TCGA-CF-A1HS	Basal	Basal	Basal_squamous	basal	Ba/Sq	MC7	Ba/Sq	C2	Low
TCGA-CF-A27C	Luminal	Differentiated	Luminal_papillary	luminal	UroA-Prog	MC1	LumP	C2	Low
TCGA-CF-A3MF	Luminal	Differentiated	Luminal_papillary	luminal	UroA-Prog	MC1	LumP	C2	Low
TCGA-CF-A3MH	Luminal	Differentiated	Luminal_papillary	luminal	UroA-Prog	MC1	LumP	C2	Low
TCGA-CF-A3MI	Luminal	Differentiated	Luminal_papillary	p53-like	UroA-Prog	MC1	LumP	C2	Low
TCGA-CF-A47X	Luminal	Differentiated	Luminal_papillary	luminal	UroA-Prog	MC1	LumP	C2	Low
TCGA-CF-A47Y	Luminal	Basal	Luminal_papillary	p53-like	UroA-Prog	MC1	LumP	C2	Low
TCGA-CF-A5U8	Luminal	Differentiated	Luminal_papillary	luminal	UroA-Prog	MC1	LumP	C2	Low
TCGA-CF-A5UA	Luminal	Differentiated	Luminal_papillary	p53-like	UroA-Prog	MC1	LumP	C1	Low
TCGA-CF-A7I0	Luminal	Differentiated	Luminal	p53-like	UroA-Prog	MC1	LumP	C2	Low
TCGA-CF-A8HX	Luminal	Differentiated	Luminal_papillary	p53-like	UroA-Prog	MC1	LumP	C2	Low
TCGA-CF-A8HY	Luminal	Differentiated	Luminal_papillary	luminal	UroA-Prog	MC1	LumP	C2	Low
TCGA-CF-A9FF	Luminal	Differentiated	Luminal_papillary	luminal	UroA-Prog	MC1	LumP	C2	Low
TCGA-CF-A9FH	Luminal	Differentiated	Luminal_papillary	luminal	UroA-Prog	MC1	LumP	C2	Low
TCGA-CF-A9FL	Luminal	Differentiated	Luminal	p53-like	UroA-Prog	MC1	LumP	C2	Low
TCGA-CU-A0YO	Luminal	Basal	Luminal_infiltrated	p53-like	UroA-Prog	MC4	LumP	C1	Low
TCGA-CU-A0YR	Luminal	Differentiated	Luminal	luminal	UroC	MC1	LumU	C1	Low
TCGA-CU-A3KJ	Basal	Basal	Basal_squamous	basal	Ba/Sq	MC7	Ba/Sq	C2	Low
TCGA-CU-A3YL	Luminal	Differentiated	Luminal_papillary	p53-like	UroA-Prog	MC1	LumP	C2	Low
TCGA-CU-A5W6	Luminal	Differentiated	Luminal_papillary	p53-like	UroC	MC1	LumP	C1	Low
TCGA-DK-A1A6	Luminal	Differentiated	Luminal	luminal	UroC	MC1	LumU	C1	Low
TCGA-DK-A1A7	Luminal	Differentiated	Luminal_papillary	luminal	UroC	MC1	LumP	C2	Low
TCGA-DK-A1AB	Basal	Basal	Basal_squamous	basal	Ba/Sq-Inf	MC7	Ba/Sq	C2	Low
TCGA-DK-A1AC	Luminal	Differentiated	Luminal_infiltrated	luminal	GU	MC3	LumU	C1	Low
TCGA-DK-A1AD	Luminal	Differentiated	Luminal	p53-like	UroC	MC1	LumNS	C2	Low
TCGA-DK-A2HX	Basal	Differentiated	Luminal_infiltrated	p53-like	GU-Inf	MC4	Stroma-rich	C2	Low
TCGA-DK-A2I1	Luminal	Differentiated	Luminal	p53-like	UroC	MC2	LumNS	C1	Low
TCGA-DK-A2I2	Basal	Basal	Basal_squamous	basal	Ba/Sq	MC7	Ba/Sq	C2	Low
TCGA-DK-A2I4	Basal	Basal	Basal_squamous	basal	Mes-like	MC7	Ba/Sq	C1	Low
TCGA-DK-A2I6	Basal	Differentiated	Basal_squamous	basal	Ba/Sq-Inf	MC7	Ba/Sq	C1	Low
TCGA-DK-A3IK	Luminal	Differentiated	Luminal	p53-like	UroC	MC2	LumNS	C2	Low
TCGA-DK-A3IL	Luminal	Differentiated	Luminal	p53-like	UroC	MC1	LumNS	C2	Low
TCGA-DK-A3IM	Basal	Basal	Basal_squamous	basal	Ba/Sq	MC7	Ba/Sq	C2	Low
TCGA-DK-A3IN	Basal	Differentiated	Basal_squamous	basal	Ba/Sq-Inf	MC7	Ba/Sq	C1	Low
TCGA-DK-A3IT	Luminal	Differentiated	Luminal	p53-like	UroC	MC2	LumNS	C2	Low
TCGA-DK-A3WW	Basal	Basal	Basal_squamous	basal	Ba/Sq	MC7	Ba/Sq	C1	Low
TCGA-DK-A3WY	Basal	Basal	Basal_squamous	basal	Mes-like	MC4	Stroma-rich	C1	Low
TCGA-DK-A3X1	Luminal	Differentiated	Luminal_papillary	luminal	UroC	MC1	LumP	C2	Low
TCGA-DK-A3X2	Luminal	Basal	Luminal_papillary	luminal	UroB	MC7	Ba/Sq	C2	Low
TCGA-DK-A6AV	Luminal	Differentiated	Luminal_papillary	luminal	UroA-Prog	MC1	LumP	C1	Low
TCGA-DK-A6B1	Luminal	Differentiated	Luminal_papillary	luminal	GU	MC1	LumU	C2	Low
TCGA-DK-A6B5	Basal	Basal	Basal_squamous	basal	UroB	MC7	Ba/Sq	C2	Low
TCGA-DK-AA6L	Luminal	Basal	Luminal_papillary	basal	UroB	MC7	Ba/Sq	C2	Low
TCGA-DK-AA6P	Luminal	Differentiated	Luminal_papillary	luminal	UroA-Prog	MC1	LumP	C2	Low
TCGA-DK-AA6R	Basal	Basal	Basal_squamous	basal	Ba/Sq	MC7	Ba/Sq	C2	Low
TCGA-DK-AA6S	Basal	Basal	Basal_squamous	basal	Ba/Sq-Inf	MC7	Ba/Sq	C2	Low
TCGA-DK-AA6T	Basal	Differentiated	Luminal_infiltrated	p53-like	Sc/NE-like	MC3	Stroma-rich	C1	Low
TCGA-DK-AA6U	Luminal	Differentiated	Luminal_papillary	luminal	GU	MC1	LumU	C2	Low
TCGA-DK-AA75	Luminal	Differentiated	Luminal_papillary	luminal	GU	MC1	LumU	C2	Low
TCGA-DK-AA76	Luminal	Differentiated	Luminal_papillary	luminal	UroA-Prog	MC1	LumP	C2	Low
TCGA-DK-AA77	Luminal	Differentiated	Luminal_papillary	luminal	UroA-Prog	MC1	LumP	C1	Low
TCGA-E5-A4U1	Luminal	Differentiated	Luminal_papillary	p53-like	UroA-Prog	MC1	LumP	C2	Low
TCGA-E7-A3X6	Basal	Basal	Basal_squamous	basal	UroB	MC7	Ba/Sq	C1	Low
TCGA-E7-A3Y1	Luminal	Basal	Luminal_papillary	p53-like	UroA-Prog	MC1	LumP	C2	Low
TCGA-E7-A4IJ	Luminal	Differentiated	Luminal_papillary	luminal	UroC	MC1	LumP	C1	Low
TCGA-E7-A4XJ	Luminal	Differentiated	Luminal_papillary	luminal	UroA-Prog	MC1	LumP	C2	Low
TCGA-E7-A519	Luminal	Differentiated	Luminal_papillary	p53-like	Uro-Inf	MC1	LumP	C1	Low
TCGA-E7-A6ME	Luminal	Differentiated	Luminal_papillary	luminal	GU	MC3	LumU	C1	Low
TCGA-E7-A7DU	Luminal	Differentiated	Luminal_papillary	luminal	UroA-Prog	MC1	LumP	C2	Low
TCGA-E7-A7PW	Luminal	Differentiated	Luminal_papillary	luminal	UroC	MC1	LumP	C1	Low
TCGA-E7-A85H	Luminal	Differentiated	Luminal	luminal	UroC	MC3	LumU	C1	Low
TCGA-E7-A8O8	Luminal	Differentiated	Luminal_papillary	p53-like	UroA-Prog	MC1	LumP	C1	Low
TCGA-E7-A97Q	Luminal	Differentiated	Luminal	p53-like	UroC	MC2	LumNS	C2	Low
TCGA-FD-A3B5	Basal	Basal	Basal_squamous	basal	Ba/Sq	MC7	Ba/Sq	C2	Low
TCGA-FD-A3B7	Basal	Basal	Basal_squamous	basal	Ba/Sq-Inf	MC7	Ba/Sq	C1	Low
TCGA-FD-A3SJ	Luminal	Differentiated	Luminal	p53-like	UroC	MC3	LumU	C2	Low
TCGA-FD-A3SL	Luminal	Differentiated	Luminal_infiltrated	p53-like	GU-Inf	MC4	Stroma-rich	C1	Low
TCGA-FD-A3SR	Luminal	Differentiated	Luminal_infiltrated	luminal	GU-Inf	MC4	LumU	C1	Low
TCGA-FD-A3SS	Luminal	Differentiated	Luminal	luminal	GU-Inf	MC7	Ba/Sq	C2	Low
TCGA-FD-A43N	Luminal	Differentiated	Luminal	luminal	UroC	MC2	LumNS	C2	Low
TCGA-FD-A43P	Luminal	Differentiated	Luminal	luminal	GU	MC3	LumU	C1	Low
TCGA-FD-A5BR	Luminal	Differentiated	Luminal_infiltrated	basal	Uro-Inf	MC2	LumP	C2	Low
TCGA-FD-A5BS	Basal	Basal	Basal_squamous	basal	Mes-like	MC4	Ba/Sq	C1	Low
TCGA-FD-A5BV	Luminal	Differentiated	Luminal_papillary	p53-like	GU	MC1	LumP	C2	Low
TCGA-FD-A5C0	Luminal	Differentiated	Luminal	luminal	UroC	MC1	LumP	C2	Low
TCGA-FD-A62P	Basal	Differentiated	Luminal_infiltrated	basal	Ba/Sq	MC7	Ba/Sq	C2	Low
TCGA-FD-A6TA	Luminal	Differentiated	Luminal_infiltrated	p53-like	Uro-Inf	MC2	LumNS	C1	Low
TCGA-FD-A6TC	Basal	Differentiated	Luminal_infiltrated	p53-like	GU-Inf	MC7	LumNS	C2	Low
TCGA-FD-A6TD	Basal	Basal	Basal_squamous	basal	Ba/Sq-Inf	MC7	Ba/Sq	C1	Low
TCGA-FD-A6TH	Basal	Differentiated	Basal_squamous	p53-like	GU-Inf	MC7	Ba/Sq	C2	Low
TCGA-FJ-A3Z7	Luminal	Differentiated	Luminal	p53-like	GU	MC3	LumU	C2	Low
TCGA-FJ-A3ZE	Luminal	Differentiated	Luminal_papillary	luminal	UroA-Prog	MC1	LumP	C2	Low
TCGA-FJ-A3ZF	Luminal	Differentiated	Luminal_papillary	luminal	GU	MC3	LumU	C2	Low
TCGA-FT-A3EE	Luminal	Differentiated	Luminal_papillary	luminal	UroA-Prog	MC7	LumP	C2	Low
TCGA-G2-A2EL	Basal	Basal	Neuronal	p53-like	Sc/NE-like	MC6	NE-like	C2	Low
TCGA-G2-A3IE	Luminal	Differentiated	Luminal_papillary	p53-like	UroA-Prog	MC1	LumP	C1	Low
TCGA-G2-A3VY	Luminal	Differentiated	Luminal_papillary	luminal	UroC	MC1	LumU	C2	Low
TCGA-G2-AA3B	Luminal	Differentiated	Luminal_papillary	luminal	UroC	MC1	LumP	C1	Low
TCGA-G2-AA3F	Luminal	Differentiated	Luminal_papillary	luminal	UroC	MC1	LumU	C2	Low
TCGA-GC-A3BM	Luminal	Basal	Luminal_papillary	luminal	UroB	MC1	LumP	C1	Low
TCGA-GC-A3I6	Basal	Basal	Basal_squamous	basal	Ba/Sq	MC7	Ba/Sq	C1	Low
TCGA-GC-A3RD	Luminal	Differentiated	Luminal_papillary	luminal	UroA-Prog	MC1	LumP	C1	Low
TCGA-GC-A3YS	Basal	Basal	Basal_squamous	basal	Ba/Sq-Inf	MC7	Ba/Sq	C2	Low
TCGA-GD-A2C5	Luminal	Differentiated	Luminal	p53-like	UroC	MC2	LumNS	C2	Low
TCGA-GD-A6C6	Luminal	Differentiated	Luminal_papillary	p53-like	GU-Inf	MC1	LumP	C1	Low
TCGA-GD-A76B	Luminal	Differentiated	Luminal_papillary	luminal	UroC	MC1	LumU	C1	Low
TCGA-GU-A42R	Luminal	Basal	Luminal_papillary	luminal	UroA-Prog	MC1	LumP	C2	Low
TCGA-GU-A767	Luminal	Differentiated	Luminal	p53-like	UroC	MC1	LumP	C2	Low
TCGA-GU-AATP	Luminal	Differentiated	Luminal_infiltrated	p53-like	GU-Inf	MC2	LumU	C2	Low
TCGA-GV-A3JV	Luminal	Differentiated	Luminal	luminal	UroA-Prog	MC1	LumNS	C1	Low
TCGA-GV-A3JW	Luminal	Differentiated	Luminal_papillary	luminal	UroC	MC1	LumP	C2	Low
TCGA-GV-A3JZ	Luminal	Differentiated	Luminal	luminal	GU-Inf	MC3	LumU	C1	Low
TCGA-GV-A3QF	Luminal	Differentiated	Luminal_papillary	luminal	UroC	MC1	LumP	C2	Low
TCGA-GV-A3QG	Basal	Differentiated	Luminal_infiltrated	basal	GU-Inf	MC4	Stroma-rich	C1	Low
TCGA-GV-A3QH	Luminal	Differentiated	Luminal_papillary	luminal	GU	MC1	LumU	C2	Low
TCGA-GV-A3QI	Luminal	Basal	Luminal_papillary	luminal	GU	MC1	LumP	C2	Low
TCGA-GV-A3QK	Luminal	Differentiated	Luminal_papillary	luminal	UroA-Prog	MC1	LumP	C1	Low
TCGA-GV-A40E	Basal	Differentiated	Basal_squamous	basal	Ba/Sq-Inf	MC7	Ba/Sq	C2	Low
TCGA-GV-A40G	Luminal	Differentiated	Luminal_papillary	luminal	GU	MC1	LumU	C2	Low
TCGA-GV-A6ZA	Luminal	Differentiated	Luminal_papillary	luminal	UroA-Prog	MC1	LumP	C1	Low
TCGA-H4-A2HO	Luminal	Differentiated	Luminal_papillary	luminal	UroC	MC1	LumU	C2	Low
TCGA-H4-A2HQ	Luminal	Basal	Luminal_papillary	luminal	UroA-Prog	MC1	LumP	C1	Low
TCGA-HQ-A2OE	Luminal	Basal	Luminal_papillary	luminal	UroA-Prog	MC1	LumP	C1	Low
TCGA-HQ-A2OF	Luminal	Differentiated	Luminal_papillary	luminal	Sc/NE-like	MC3	LumU	C2	Low
TCGA-K4-A3WS	Luminal	Differentiated	Luminal_infiltrated	p53-like	Uro-Inf	MC4	Stroma-rich	C2	Low
TCGA-K4-A3WV	Basal	Basal	Neuronal	basal	Sc/NE-like	MC7	Ba/Sq	C2	Low
TCGA-K4-A6MB	Luminal	Differentiated	Luminal	luminal	UroC	MC1	LumU	C2	Low
TCGA-K4-A83P	Luminal	Differentiated	Luminal_infiltrated	p53-like	Mes-like	MC4	Stroma-rich	C1	Low
TCGA-KQ-A41N	Luminal	Differentiated	Luminal_papillary	p53-like	UroC	MC1	LumP	C2	Low
TCGA-KQ-A41O	Luminal	Differentiated	Luminal_papillary	luminal	UroA-Prog	MC1	LumP	C2	Low
TCGA-KQ-A41Q	Luminal	Differentiated	Luminal_papillary	luminal	UroC	MC1	LumU	C1	Low
TCGA-KQ-A41R	Luminal	Differentiated	Luminal_papillary	luminal	UroC	MC1	LumP	C2	Low
TCGA-KQ-A41S	Luminal	Differentiated	Luminal_infiltrated	p53-like	GU-Inf	MC2	LumU	C2	Low
TCGA-LT-A5Z6	Luminal	Differentiated	Luminal_papillary	luminal	GU	MC1	LumU	C1	Low
TCGA-LT-A8JT	Luminal	Differentiated	Luminal_papillary	luminal	UroA-Prog	MC1	LumP	C1	Low
TCGA-MV-A51V	Luminal	Differentiated	Luminal_papillary	luminal	GU	MC1	LumU	C2	Low
TCGA-S5-A6DX	Luminal	Differentiated	Luminal	p53-like	Uro-Inf	MC2	LumNS	C1	Low
TCGA-S5-AA26	Luminal	Differentiated	Luminal_papillary	p53-like	UroA-Prog	MC1	LumP	C2	Low
TCGA-UY-A78K	Luminal	Differentiated	Luminal_papillary	luminal	GU	MC3	LumU	C1	Low
TCGA-UY-A78N	Luminal	Basal	Luminal	p53-like	UroC	MC3	LumP	C2	Low
TCGA-UY-A78O	Luminal	Differentiated	Luminal_papillary	luminal	UroA-Prog	MC1	LumP	C2	Low
TCGA-UY-A8OD	Luminal	Differentiated	Luminal_infiltrated	p53-like	GU-Inf	MC4	Stroma-rich	C2	Low
TCGA-UY-A9PD	Luminal	Differentiated	Luminal	luminal	UroC	MC2	LumNS	C2	Low
TCGA-UY-A9PE	Luminal	Differentiated	Luminal	p53-like	UroC	MC2	LumNS	C2	Low
TCGA-UY-A9PF	Luminal	Differentiated	Luminal	luminal	UroA-Prog	MC1	LumP	C1	Low
TCGA-UY-A9PH	Luminal	Differentiated	Luminal_papillary	p53-like	UroC	MC1	LumP	C1	Low
TCGA-XF-A8HC	Luminal	Differentiated	Luminal_papillary	luminal	GU	MC1	LumU	C2	Low
TCGA-XF-A8HF	Luminal	Differentiated	Luminal	luminal	UroC	MC1	LumNS	C1	Low
TCGA-XF-A8HG	Luminal	Differentiated	Luminal_papillary	luminal	UroA-Prog	MC1	LumP	C1	Low
TCGA-XF-A9SH	Luminal	Differentiated	Luminal_papillary	p53-like	UroA-Prog	MC1	LumP	C1	Low
TCGA-XF-A9SI	Basal	Basal	Basal_squamous	basal	Mes-like	MC4	Stroma-rich	C1	Low
TCGA-XF-A9SJ	Luminal	Differentiated	Luminal_infiltrated	p53-like	GU-Inf	MC7	Ba/Sq	C1	Low
TCGA-XF-A9ST	Basal	Differentiated	Neuronal	p53-like	Sc/NE-like	MC7	Ba/Sq	C2	Low
TCGA-XF-A9SU	Luminal	Differentiated	Luminal_infiltrated	p53-like	Uro-Inf	MC5	LumNS	C2	Low
TCGA-XF-A9SV	Luminal	Differentiated	Luminal	p53-like	UroC	MC2	LumNS	C2	Low
TCGA-XF-A9SZ	Basal	Differentiated	Luminal_infiltrated	luminal	GU-Inf	MC2	LumNS	C2	Low
TCGA-XF-A9T2	Basal	Differentiated	Neuronal	basal	Sc/NE-like	MC7	Ba/Sq	C2	Low
TCGA-XF-A9T5	Basal	Basal	Basal_squamous	basal	Ba/Sq-Inf	MC7	Ba/Sq	C1	Low
TCGA-XF-A9T6	Basal	Differentiated	Basal_squamous	basal	Ba/Sq-Inf	MC7	Ba/Sq	C1	Low
TCGA-XF-AAMG	Luminal	Basal	Neuronal	p53-like	Sc/NE-like	MC3	LumU	C2	Low
TCGA-XF-AAML	Luminal	Differentiated	Luminal_papillary	luminal	GU	MC1	LumU	C1	Low
TCGA-XF-AAMQ	Luminal	Differentiated	Luminal_papillary	p53-like	UroA-Prog	MC1	LumP	C1	Low
TCGA-XF-AAMX	Luminal	Differentiated	Luminal	luminal	UroC	MC1	LumNS	C2	Low
TCGA-XF-AAMZ	Luminal	Differentiated	Luminal_papillary	luminal	UroC	MC1	LumP	C1	Low
TCGA-XF-AAN0	Basal	Basal	Luminal_infiltrated	basal	GU-Inf	MC7	Ba/Sq	C1	Low
TCGA-XF-AAN5	Basal	Basal	Basal_squamous	basal	Ba/Sq-Inf	MC7	Ba/Sq	C1	Low
TCGA-XF-AAN7	Basal	Basal	Neuronal	basal	Sc/NE-like	MC6	NE-like	C2	Low
TCGA-YF-AA3L	Luminal	Differentiated	Luminal_papillary	p53-like	UroA-Prog	MC1	LumP	C1	Low
TCGA-ZF-A9R1	Luminal	Differentiated	Luminal_papillary	p53-like	UroA-Prog	MC1	LumP	C2	Low
TCGA-ZF-A9R2	Luminal	Basal	Luminal_papillary	luminal	UroA-Prog	MC1	LumP	C2	Low
TCGA-ZF-A9R4	Luminal	Differentiated	Luminal_papillary	luminal	UroC	MC1	LumP	C1	Low
TCGA-ZF-A9R7	Luminal	Basal	Luminal_papillary	p53-like	UroA-Prog	MC1	LumP	C1	Low
TCGA-ZF-A9R9	Luminal	Differentiated	Luminal_infiltrated	p53-like	Uro-Inf	MC4	LumNS	C2	Low
TCGA-ZF-A9RC	Luminal	Differentiated	Luminal	p53-like	Uro-Inf	MC5	Stroma-rich	C2	Low
TCGA-ZF-A9RD	Basal	Basal	Basal_squamous	basal	Ba/Sq	MC7	Ba/Sq	C1	Low
TCGA-ZF-A9RL	Luminal	Differentiated	Luminal_papillary	luminal	UroA-Prog	MC1	LumP	C2	Low
TCGA-ZF-A9RM	Luminal	Differentiated	Luminal_papillary	luminal	UroC	MC1	LumP	C2	Low
TCGA-ZF-A9RN	Basal	Basal	Basal_squamous	p53-like	Sc/NE-like	MC7	Ba/Sq	C1	Low
TCGA-ZF-AA4T	Luminal	Differentiated	Luminal_papillary	luminal	GU	MC3	LumU	C2	Low
TCGA-ZF-AA4V	Basal	Differentiated	Basal_squamous	basal	Ba/Sq-Inf	MC7	Ba/Sq	C2	Low
TCGA-ZF-AA51	Luminal	Differentiated	Luminal_infiltrated	luminal	UroC	MC1	LumP	C1	Low
TCGA-ZF-AA52	Basal	Differentiated	Luminal_infiltrated	p53-like	GU-Inf	MC4	Stroma-rich	C2	Low
TCGA-ZF-AA5H	Basal	Differentiated	Basal_squamous	basal	Ba/Sq-Inf	MC7	Ba/Sq	C2	Low

## Sheet: Table S6
Table S6. Genes and coefficients for calculating T-cell inflammation scores
gene	coefficient
CCL5	0.008346
CD27	0.072293
CD274	0.042853
CD276	-0.0239
CD8A	0.031021
CMKLR1	0.151253
CXCL9	0.074135
CXCR6	0.004313
HLA-DQA1	0.020091
HLA-DRB1	0.058806
HLA-E	0.07175
IDO1	0.060679
LAG3	0.123895
NKG7	0.075524
PDCD1LG2	0.003734
PSMB10	0.032999
STAT1	0.250229
TIGIT	0.084767

## Sheet: Table S7
Table S7. Therapeutic predicted pathways
IFN-γ_signature-Anticancer_immunotherapy	PMID: 28650338	TIGIT	CD27	CD8A	PDCD1LG2	LAG3	CD274	CXCR6	CMKLR1	NKG7	CCL5	PSMB10	IDO1	CXCL9	HLA-DQA1	CD276	STAT1	HLA-DRB1	HLA-E
APM_signal-Anticancer_immunotherapy	PMID: 31563503	B2M	HLA-A	HLA-B	HLA-C	TAP1	TAP2
Base_excision_repair-Anticancer_immunotherapy	PMID:29443960	FEN1	LIG1	NEIL3	PARP1	PARP2	PCNA	POLE	POLE2	UNG
Cell_cycle-Anticancer_immunotherapy	PMID:29443960	BUB1	BUB1B	CCNA2	CCNB2	CCNE1	CCNE2	CDC20	CDC25A	CDC25C	CDC6	CDK1	CDK2	CDKN2A	DBF4	E2F1	E2F2	ESPL1	MAD2L1	MAD2L2	MCM2	MCM4	MCM6	MCM7	ORC1	ORC6	PCNA	PLK1	SKP2	SMC3	TFDP1	TTK	YWHAB
DNA_replication-Anticancer_immunotherapy	PMID:29443960	DNA2	FEN1	LIG1	MCM2	MCM4	MCM6	MCM7	PCNA	POLA2	POLE	POLE2	PRIM1	PRIM2	RFC2	RFC3	RFC4	RFC5	RNASEH2A	RPA1	RPA3
Fanconi_anemia_pathway-Anticancer_immunotherapy	PMID:29443960	BLM	BRCA1	BRCA2	BRIP1	EME1	ERCC4	FANCA	FANCB	FANCD2	FANCI	PALB2	RAD51	RAD51C	RMI1	RMI2	RPA1	RPA3	TOP3A	UBE2T
Homologous_recombination-Anticancer_immunotherapy	PMID:29443960	BLM	BRCA2	EME1	RAD51	RAD51C	RAD54L	RPA1	RPA3	TOP3A	XRCC2	XRCC3
MicroRNAs_in_cancer-Anticancer_immunotherapy	PMID:29443960	BRCA1	CCNE1	CCNE2	CDC25A	CDC25C	CDCA5	CDKN2A	DNMT1	E2F1	E2F2	EZH2	KIF23	STMN1	TRIM71
Mismatch_repair-Anticancer_immunotherapy	PMID:29443960	EXO1	LIG1	PCNA	RFC2	RFC3	RFC4	RFC5	RPA1	RPA3
Nucleotide_excision_repair-Anticancer_immunotherapy	PMID:29443960	CETN2	ERCC4	LIG1	PCNA	POLE	POLE2	RFC2	RFC3	RFC4	RFC5	RPA1	RPA3
Oocyte_meiosis-Anticancer_immunotherapy	PMID:29443960	AURKA	BUB1	CCNB2	CCNE1	CCNE2	CDC20	CDC25C	CDK1	CDK2	ESPL1	FBXO5	MAD2L1	MAD2L2	PLK1	SGOL1	SMC3	YWHAB
p53_signaling_pathway-Anticancer_immunotherapy	PMID:29443960	CCNB2	CCNE1	CCNE2	CDK1	CDK2	CDKN2A	GTSE1	PPM1D	RFWD2	RRM2
Progesterone-mediated_oocyte_maturation-Anticancer_immunotherapy	PMID:29443960	BUB1	CCNA2	CCNB2	CDC25A	CDC25C	CDK1	CDK2	MAD2L1	MAD2L2	PLK1
Proteasome-Anticancer_immunotherapy	PMID:29443960	IFNG	PSMA4	PSMB2	PSMB4	PSMC4	PSMD4	PSMD7
Pyrimidine_metabolism-Anticancer_immunotherapy	PMID:29443960	CTPS1	DTYMK	POLA2	POLE	POLE2	PRIM1	PRIM2	RRM2	TYMS
Spliceosome-Anticancer_immunotherapy	PMID:29443960	HNRNPM	LSM3	LSM4	LSM5	MAGOHB	PRPF19	SF3B2	SF3B3	SF3B4	SNRNP40	SNRPA1	SNRPC	USP39	WBP11
Systemic_lupus_erythematosus-Anticancer_immunotherapy	PMID:29443960	H2AFV	H2AFZ	HIST1H2AB	HIST1H2AG	HIST1H2AH	HIST1H2AI	HIST1H2AM	HIST1H2BC	HIST1H2BD	HIST1H2BF	HIST1H2BJ	HIST1H2BK	HIST1H2BL	HIST1H2BN	HIST1H2BO	HIST1H3B	HIST1H3D	HIST1H3H	HIST1H4A	HIST1H4B	HIST2H2AB	HIST2H2AC	HIST2H2BE	HIST2H2BF	HIST
Viral_carcinogenesis-Anticancer_immunotherapy	PMID:29443960	CCNA2	CCNE1	CCNE2	CDC20	CDK1	CDK2	CDKN2A	CREB3L4	GTF2E1	HIST1H2BC	HIST1H2BD	HIST1H2BF	HIST1H2BJ	HIST1H2BK	HIST1H2BL	HIST1H2BN	HIST1H2BO	HIST1H4A	HIST1H4B	HIST2H2BE	HIST2H2BF	SKP2	YWHAB
EGFR_ligands-Anti-EGFR_therapy	PMID: 31563503	EGFR	AREG	AREGB	EREG	HBEGF	TGFA
FGFR3-coexpressed_genes-Anti-FGFR3_therapy	PMID: 31563503	FGFR3	TP63	IRS1	SEMA4B	PTPN13	TMPRSS4
PPARG_network-Anti-PPARG_therapy	PMID: 27197067	PPARG	IGFBP3	GDF15	MYH14	IHH	OCLN	AQP3	SCNN1G	PLIN5	KRT19	GPT	CYP4B1	UGT1A7	DGAT2	KRT20	SNCG	GSTA1	ACADL	BDH1	HMGCS2	LIPE
WNT-β-catenin_network-Oncogenic_pathway_inhibit_CD8_T_cell_infiltration	PMID: 27197067	CTNNB1	TFF1	HAPLN1	IHH	WNT7B	BMP7	SEMA5A	SCN5A	ERBB3	TSPAN8	EPCAM	TH	GPX2	GAD1	HSD17B2	KRT7	NOX1	CYB5A	CYP4F12	ID4	SIM2	MECOM	MSX2	KLF5	SMAD6	POU5F1	FOXQ1	GATA2	GATA3	EMX2
IDH1-Oncogenic_pathway_inhibit_CD8_T_cell_infiltration	PMID: 29326431	IDH1
KDM6B-Oncogenic_pathway_inhibit_CD8_T_cell_infiltration	PMID: 26503055	KDM6B
VEGFA-Oncogenic_pathway_inhibit_CD8_T_cell_infiltration	PMID: 24793239	VEGFA
Hypoxia-Radiotherapy	PMID: 31563503	CAV1	COL5A1	ITGA5	P4HA2	SLC16A1	TGFBI	DPYSL2	SRPX	TRAM2	SYDE1	LRP1	PDLIM2	SAV1	AHNAK2	CAD	CYP1B1	DAAM1	DSC2	SLC2A3	FUT11	GLG1	GULP1	LDLR	THBS4
Cell_cycle-Radiotherapy	PMID: 31563503	ABL1	ANAPC1	ANAPC10	ANAPC11	ANAPC13	ANAPC2	ANAPC4	ANAPC5	ANAPC7	ATM	ATR	BUB1	BUB1B	BUB3	CCNA1	CCNA2	CCNB1	CCNB2	CCNB3	CCND1	CCND2	CCND3	CCNE1	CCNE2	CCNH	CDC14A	CDC14B	CDC16	CDC20	CDC23	CDC25A	CDC25B	CDC25C	CDC26	CDC27	CD
DNA_replication-Radiotherapy	PMID: 31563503	DNA2	FEN1	LIG1	MCM2	MCM3	MCM4	MCM5	MCM6	MCM7	PCNA	POLA1	POLA2	POLD1	POLD2	POLD3	POLD4	POLE	POLE2	POLE3	POLE4	PRIM1	PRIM2	RFC1	RFC2	RFC3	RFC4	RFC5	RNASEH1	RNASEH2A	RNASEH2B	RNASEH2C	RPA1	RPA2	RPA3	RPA4	SSBP1

## Sheet: Table S8
Table S8.Bladder cancer signatures
Signature	Description	Reference	Genes
Urothelial_differentiation	Urothelial_differentiation	PMID: 31563503	TMEM163, FMO9P, EPB41, IDH1, GCLC, POF1B, TBC1D1, TRAK1, BAMBI, PLCE1, SCNN1B, BHMT, DHRS2, CYB5A, PPARG, SLC9A2, TOP2B, TMEM97, NTAN1, SEMA5A, KRT20, MYCL, UPK1A, TOX3, RNF128, DAB1, ZNF436, LYPD6, ACOX1, KSR2, DMGDH, GRHL3, NIPAL1, RALGAPA2, SCNN1G, SNX
Ta_pathway	Ta_pathway	PMID: 31563503	PLCD3, BTBD16, ANKRD20A5P, CTB-174D11.3 , PROM2, SPOCD1, IGBP1, ST3GAL5, DGKA, AQP3, MAP3K5, FABP4, HNMT, MGST2, KCNQ1, IRS1, HSD17B2, ALDH1L1, SMAD3, MST1R, TCN1, CYP3A5, CTSE, HOXD1, PLCH2, SLC24A1, UGT1A1 , ID3, ABCC3, PDLIM1, AGR2, NSG1, ANXA10, MR1,
Luminal_differentiation	Luminal_differentiation	PMID:?32165065, PMID: 30224344	FGFR3,GATA3,FOXA1,UPK2,PPARG,KRT20,SNX31,UPK1A
Basal_differentiation	Basal_differentiation	PMID: 31563503	LYNX1, SCEL, CTB-113P19.4 , S100A8, SLPI, S100A9, PI3, CEACAM6, VSNL1, SERPINB2, CSTA, FGFBP1, SPRR1B, DSG3, KRT1, S100A7, CLCA2, LGALS7 , SPRR2B, KRT6A, KRT6B, SFN, SERPINB3, KRT16, SERPINB3 , SERPINB13, SERPINB4, KRT4, SPRR1A, KRT6A , ABCA12, SPRR3, TME
EMT_differentiation	EMT_differentiation	PMID:?32165065, PMID: 30224344	ZEB1,ZEB2,NOTCH2,TGFB1,CDH1,SNAI2,VIM,TWIST1,SNAI1
Immune_differentiation	Immune_differentiation	PMID:?32165065, PMID: 30224344	CTLA4,CD274,PDCD1LG2,CD47,PDCD1,IDO1,MPEG1,COL17A1,CXCL11,L1CAM,SAA1
Smooth_muscle	Smooth_muscle	PMID: 31563503	NEXN, PRUNE2, PDE5A, NEGR1, ITIH5, MSRB3, MOXD1, FGF7 , FILIP1L, PTGFR, FGF7, C1S, RHOJ, TAGLN, FILIP1, ADAMTS9-AS2, LRRN4CL, NR2F1-AS1, RBPMS, PTRF, LOC100127983, PDE1A, AC131025.8 , MEIS1, PELO, MYLK, ACTA2-AS1, OTTHUMG00000168867 , MYH11, PDLIM7, CSGAL
Myofibroblasts	Myofibroblasts	PMID: 31563503	FCER1G, FILIP1L, FGD6, C1S, ITGB2, SAMSN1, POSTN, COL1A1, BTBD19, PTRF, MSN, SPARC, CALU, DPYSL2, CTSB, PALLD, ANXA6, STOM, MMP2, LGALS1, BGN, IFITM2, VIM, COL6A3, TGFBI, CLIC4, IFITM1 , TNC, LAPTM5, CD14, LUM, AEBP1, COL3A1, DCN, NID1, SEC14L1, LAMA4, AR
Interferon_response	Interferon_response	PMID: 31563503	CTSB, UBE2L6, OPTN, MX1, CFB, PLSCR1, ICAM1, FCGR2A, IFIT5, CYBB, ALOX5AP, IFI44L, IFIT3, TLR2, OASL, IL15, XAF1, SP110, IFI35, NCF2, FCGR2C, CEBPB, RSAD2, IFI44, OTTHUMG00000003319 , LAP3, DDX60, IFIH1, HERC6, SAMD9, HERC5, CLEC4A, PARP9, DTX3L, SAMD9L,
Mitochondria	Mitochondria	PMID: 31563503	ALG14, SAR1B, PSMD10, TIMM10, PPA2, HNRNPC, ERH, DAD1, C1D, ATP6V0B, HINT1, DYNLL1, RAN, RPS15A, PSMB1, COX6A1, HSBP1, SERP1, EIF2S1, CAPZA2, COX7A2L, PSMA5, PSMA2, UBE2D2, VBP1, SUPT4H1, UBE2N, ZNHIT1, UQCRQ, NME1, COX7A2, COPS5, CNIH1, PSMA1, NDUFS3, NE
Keratinization	Keratinization	PMID: 31563503	VSNL1, KRT14, TGM1, SERPINB4, GSDMC, KRT6A, LGALS7, SFN, SPRR2A, BG205162, C12orf54, SPRR2D, HOXD11, KRT6C, KRT5, DSG3, KRT6B, HOXD10, IL20RB, RHCG, AHNAK2, SPRR2F, FGFBP1
Neuroendocrine_differentiation	Neuroendocrine_differentiation	PMID: 31563503	ZDHHC15, FAM184A, CACNA1A , EML5, SNAP25, CACNA2D2, DCX, PSIP1, ST18, RGS7, INSM1, SLC4A8, CAMK2B, ASCL1, RTN1, SCN3A, ADAM22, FAM105A, DPY19L2P2, ASRGL1, SLC1A2, MAP6, NRXN1, TTLL7, CNKSR2, RAB39B, KCNC1, GKAP1, TMEM170B, PPM1E, ELAVL4, STXBP5L, GPR137C,

## Sheet: Table S9
Table S9. BLCA-related drug target genes from DrugBank database
Durg	Target	Therapy
Bevacizumab	VEGFA	Antiangiogenic therapy
Sorafenib	BRAF	Antiangiogenic therapy
Sorafenib	RAF1	Antiangiogenic therapy
Sorafenib	FLT1	Antiangiogenic therapy
Sorafenib	KIT	Antiangiogenic therapy
Sorafenib	FLT3	Antiangiogenic therapy
Sorafenib	FLT4	Antiangiogenic therapy
Cisplatin	ATOX1	Chemotherapy
Cisplatin	MPG	Chemotherapy
Cisplatin	TF	Chemotherapy
Docetaxel	MAP2	Chemotherapy
Docetaxel	MAP4	Chemotherapy
Docetaxel	TUBB1	Chemotherapy
Docetaxel	BCL2	Chemotherapy
Doxorubicin	NOLC1	Chemotherapy
Epirubicin	CHD1	Chemotherapy
Gemcitabine	TYMS	Chemotherapy
Gemcitabine	CMPK1	Chemotherapy
Methotrexate	TYMS	Chemotherapy
Paclitaxel	MAP2	Chemotherapy
Paclitaxel	MAP4	Chemotherapy
Paclitaxel	TUBB1	Chemotherapy
Paclitaxel	BCL2	Chemotherapy
Pazopanib	SH2B3	Chemotherapy
Sunitinib	CSF1R	Chemotherapy
Sunitinib	FLT1	Chemotherapy
Sunitinib	FLT3	Chemotherapy
Sunitinib	FLT4	Chemotherapy
Vinblastine	TUBB	Chemotherapy
Vinblastine	TUBE1	Chemotherapy
Vinblastine	TUBD1	Chemotherapy
Vinblastine	TUBG1	Chemotherapy
Afatinib	ERBB4	ERBB therapy
Cetuximab	FCGR2A	ERBB therapy
Cetuximab	FCGR3A	ERBB therapy
Cetuximab	C1QC	ERBB therapy
Cetuximab	C1QB	ERBB therapy
Cetuximab	C1QA	ERBB therapy
Cetuximab	C1R	ERBB therapy
Cetuximab	C1S	ERBB therapy
Cetuximab	FCGR1A	ERBB therapy
Cetuximab	EGFR	ERBB therapy
Cetuximab	FCGR2C	ERBB therapy
Cetuximab	FCGR2B	ERBB therapy
Cetuximab	FCGR3B	ERBB therapy
Atezolizumab	CD274	Immunotherapy
Avelumab	CD274	Immunotherapy
Durvalumab	CD274	Immunotherapy
Trastuzumab	ERBB2	Immunotherapy
Trastuzumab	EGFR	Immunotherapy

## Sheet: Table S10
Table S10. Identification of hub genes associated with functional states of EMT, invasion and differentiation by WGCNA
Differentiation	EMT	Invasion
IFFO1	IFFO1	IFFO1
STAB1	STAB1	STAB1
TYROBP	TYROBP	TYROBP
VIM	VIM	VIM
LCP2	LCP2	LCP2
SPI1	SPI1	SPI1
PILRA	PILRA	PILRA
SIGLEC1	CD209	SIGLEC1
CD209	CYTH4	CD209
CYTH4	HCK	CYTH4
HCK	FAM20A	HCK
TLR8	MS4A6A	FAM20A
TNFSF13B	MS4A4A	MS4A6A
CD33	IL10RA	MS4A4A
FAM20A	SELPLG	IL10RA
MS4A6A	CLEC4A	SELPLG
MS4A4A	CD86	CLEC4A
IL10RA	NCF2	CD86
SELPLG	TGFBI	NCF2
BIN2	GLIPR2	TGFBI
CLEC4A	SRGN	GLIPR2
CD86	TNFAIP6	SRGN
NCF2	FGL2	TNFAIP6
CXorf21	SIGLEC9	FGL2
TGFBI	THEMIS2	SIGLEC9
GLIPR2	MPP1	THEMIS2
SRGN	LILRB2	MPP1
ARHGAP9	GFPT2	LILRB2
TNFAIP6	ALOX5AP	GFPT2
FGL2	IL2RA	ALOX5AP
SIGLEC9	HAVCR2	IL2RA
THEMIS2	SLCO2B1	HAVCR2
MPP1	GLIPR1	SLCO2B1
LILRB2	COL6A1	GLIPR1
GFPT2	COL6A2	COL6A1
ALOX5AP	EMP3	COL6A2
IL2RA	MYO1F	EMP3
HAVCR2	SIGLEC10	MYO1F
AOAH	C1orf162	SIGLEC10
MYO1G	FCGR2A	C1orf162
SLCO2B1	DOK2	FCGR2A
PARVG	FCGR1A	DOK2
GLIPR1	LY96	FCGR1A
GPR65	SLC7A7	LY96
PIK3R5	VSIG4	SLC7A7
COL6A1	SLA	VSIG4
COL6A2	SLAMF8	SLA
EMP3	FCER1G	SLAMF8
MYO1F	C1QC	FCER1G
SIGLEC10	C1R	C1QC
C1orf162	ITGB2	C1R
FCGR2A	HK3	ITGB2
DOK2	NLRP3	HK3
FERMT3	TNFAIP8L2	NLRP3
FCGR1A	NNMT	TNFAIP8L2
LY96	AXL	NNMT
SLC7A7	LAIR1	AXL
VSIG4	CD300C	LAIR1
SLA	CD300A	CD300C
SLAMF8	RAB3IL1	CD300A
FCER1G	IL7R	RAB3IL1
C1QC	SIGLEC7	IL7R
C1R	RNASE6	SIGLEC7
GAB3	CD14	RNASE6
ITGB2	OSCAR	CD14
HK3	FPR1	OSCAR
NLRP3	RASGRP4	FPR1
TNFAIP8L2	C3AR1	RASGRP4
NNMT	C1QB	C3AR1
AXL	C1QA	C1QB
LAIR1	CMKLR1	C1QA
CD300C	LRRC25	CMKLR1
CD300A	CAVIN1	LRRC25
RAB3IL1	CD163	CAVIN1
IL7R	FAM20C	CD163
SIGLEC7	C1S	FAM20C
RNASE6	CSF1R	C1S
CD14	CD300LF	CSF1R
OSCAR	LILRB4	CD300LF
FPR1	LILRA5	LILRB4
RASGRP4	FPR3	LILRA5
C3AR1	ANXA6	FPR3
C1QB	C5AR1	ANXA6
C1QA	MPEG1	C5AR1
CMKLR1	PDCD1LG2	MPEG1
LRRC25	SIRPA	PDCD1LG2
CAVIN1	FCGR3A	SIRPA
CD163	AIF1	FCGR3A
FAM20C	LST1	AIF1
TMEM150B	LILRB3	LST1
C1S	TSPAN4	LILRB3
CSF1R	NFAM1	TSPAN4
CSF1	PLEKHO2	NFAM1
CD300LF	LILRA6	PLEKHO2
LILRB4	PIK3R6	LILRA6
LILRA5		PIK3R6
FPR3
ANXA6
C5AR1
MPEG1
PDCD1LG2
SIRPA
FCGR3A
AIF1
LST1
LILRB3
TSPAN4
NFAM1
PLEKHO2
LILRA6
PIK3R6
